# Supplementary material for: Cervical cancer screening programmes and age-specific coverage estimates for 202 countries and territories worldwide: a review and synthetic analysis
Source: PubMed Central journal article supplement — Lancet Glob Health. 2022 Jul 12;10(8):e1115–27. doi: 10.1016/S2214-109X(22)00241-8 (PMC9296658; doi:10.1016/s2214-109x(22)00241-8), 2022-07-12
Supplement: mmc1.pdf [file mmc1.pdf]

# THE LANCET

## Global Health

### Supplementary appendix 1

This translation in French was submitted by the authors and we reproduce it as supplied. It has not been peer reviewed. *The Lancet's* editorial processes have only been applied to the original in English, which should serve as reference for this manuscript.

Cette traduction en français a été proposée par les auteurs et nous l'avons reproduite telle quelle. Elle n'a pas été examinée par des pairs. Les processus éditoriaux du *Lancet* n'ont été appliqués qu'à l'original en anglais et c'est cette version qui doit servir de référence pour ce manuscrit.

Supplement to: Bruni L, Serrano B, Roura E, et al. Cervical cancer screening programmes and age-specific coverage estimates for 202 countries and territories worldwide: a review and synthetic analysis. *Lancet Glob Health* 2022; **10**: e1115–27.

## RÉSUMÉ

**Contexte :** La couverture du dépistage du cancer du col de l'utérus est un indicateur de surveillance essentiel du plan de l'Organisation mondiale de la Santé (OMS) pour l'élimination du cancer du col de l'utérus. Nous présentons des estimations de la couverture mondiale, régionale et nationale du dépistage du cancer du col de l'utérus, dans le cadre de l'objectif de couverture de 70% fixé par l'OMS.

**Méthodes :** Dans cette revue et analyse synthétique nous avons recherché dans la littérature scientifique, les sites Web gouvernementaux et la documentation officielle afin d'identifier les recommandations nationales officielles et les données de couverture pour le dépistage du cancer du col de l'utérus pour les 194 États membres de l'OMS et huit pays et territoires associés, publiés depuis leur mise en place jusqu'au Octobre 30, 2020 ; complétée par l'organisation par l'OMS d'une consultation officielle des pays du Novembre 27, 2020, au Février 12, 2021. Nous avons extrait des données sur l'année d'introduction des recommandations, l'existence d'invitations individuelles à participer, le financement des tests de dépistage, les tests de dépistage primaires et de triage utilisés, les âges et les intervalles de dépistage recommandés, l'utilisation de l'auto-échantillonnage et l'utilisation de la stratégie de dépister et traiter. Nous avons recueilli des données de couverture, soit administratives, soit basées sur des enquêtes, désagrégées par âge et pour tous les intervalles de dépistage disponibles. En fonction de l'exhaustivité et de la représentativité des données, différents modèles statistiques ont été élaborés pour calculer des couvertures nationales par âge et par intervalle de dépistage, qui ont été transformées en points de données à un seul âge. Les données manquantes ont été imputées. Les estimations ont été appliquées à la population de 2019 et agrégées par région et par niveau de revenu.

**Résultats :** Nous avons identifié des recommandations officielles pour le dépistage du cancer du col de l'utérus dans 139 (69%) des 202 pays et territoires. La cytologie était la principale méthode de dépistage dans 109 (78%) des 139 pays. 48 (35%) des 139 pays recommandaient le dépistage primaire basé sur le test HPV. L'inspection visuelle à l'acide acétique était le test le plus recommandé dans les environnements à ressources limitées. La couverture mondiale estimée chez les femmes âgées de 30 à 49 ans, en 2019, était de 15% sur un an, de 28% sur trois ans, de 32% sur cinq ans et de 36% au moins une fois dans la vie. On estime que 1,6 (67 %) milliard des 2,3 milliards de femmes âgées de 20 à 70 ans, dont 662 (64 %) millions des 1,0 milliard de femmes âgées de 30 à 49 ans, n'avaient jamais été dépistées pour le cancer du col de l'utérus. 133 (84%) millions des 158 millions de femmes âgées de 30 à 49 ans vivant dans les pays à revenu élevé avaient été dépistées au cours de leur vie, contre 194 (48%) millions des 404 millions de femmes vivant dans les pays à revenu intermédiaire supérieur, 34 (9%) millions des 397 millions de femmes vivant dans les pays à revenu intermédiaire inférieure et 8 (11%) millions des 74 millions vivant dans les pays à faible revenu.

**Interprétation :** Deux femmes sur trois âgées de 30 à 49 ans n'ont jamais bénéficié d'un test de dépistage du cancer du col de l'utérus. Dans les pays à revenu faible ou intermédiaire, où la charge de morbidité est la plus élevée, le dépistage est peu disponible. L'intensification des efforts déployés dans le cadre des systèmes de surveillance en matière de couverture et de contrôle de la qualité est un enjeu important pour atteindre l'objectif d'élimination fixé par l'OMS.

Financement : Instituto de Salud Carlos III, Fonds européen de développement régional, Secrétariat des universités et de la recherche du Département des affaires et de la connaissance du gouvernement de Catalogne et, Horizon 2020.

**Mots-clés :** cancer du col de l'utérus, recommandations en matière de dépistage, élimination, couverture du dépistage.
