# Supplementary material for: Cervical cancer screening programmes and age-specific coverage estimates for 202 countries and territories worldwide: a review and synthetic analysis
Source: PubMed Central journal article supplement — Lancet Glob Health. 2022 Jul 12;10(8):e1115–27. doi: 10.1016/S2214-109X(22)00241-8 (PMC9296658; doi:10.1016/s2214-109x(22)00241-8), 2022-07-12
Supplement: mmc2.pdf [file mmc2.pdf]

# THE LANCET

## Global Health

### Supplementary appendix 2

This translation in Spanish was submitted by the authors and we reproduce it as supplied. It has not been peer reviewed. *The Lancet's* editorial processes have only been applied to the original in English, which should serve as reference for this manuscript.

Los autores nos proporcionaron esta traducción al español y la reproducimos tal como nos fue entregada. No la hemos revisado. Los procesos editoriales de *The Lancet* se han aplicado únicamente al original en inglés, que debe servir de referencia para este manuscrito.

Supplement to: Bruni L, Serrano B, Roura E, et al. Cervical cancer screening programmes and age-specific coverage estimates for 202 countries and territories worldwide: a review and synthetic analysis. *Lancet Glob Health* 2022; **10**: e1115–27.

## RESUMEN

**Introducción:** La cobertura del cribado de cáncer de cuello uterino es un indicador clave de seguimiento del plan de la Organización Mundial de la Salud (OMS) para la eliminación del cáncer de cuello uterino. Se presentan estimaciones mundiales, regionales y nacionales de cobertura del cribado de cáncer de cuello de útero en el marco del objetivo de cobertura del 70% establecido por la OMS.

**Métodos:** En esta revisión y análisis sintético, se hizo una búsqueda en la literatura científica, sitios web gubernamentales y documentos para identificar las recomendaciones nacionales oficiales y los datos de cobertura del cribado de cáncer de cuello uterino para los 194 estados miembros de la OMS y ocho países y territorios asociados, publicados desde su inicio hasta el 30 de octubre de 2020, complementado con una consulta oficial de la OMS a los países realizada desde el 27 de noviembre de 2020 al 12 de febrero de 2021. Se extrajeron datos relativos al año de introducción de las recomendaciones, la existencia de invitación para participar en el cribado, la financiación de las pruebas, las pruebas de cribado primario y de triaje utilizadas, las edades e intervalos de cribado recomendados, el uso de la autotoma, así como el uso de estrategias de ver y tratar. Los datos de cobertura de cribado, procedentes de encuestas de salud o de datos administrativos, se recogieron desglosados por edad y para cualquier intervalo de cribado disponible. Según la exhaustividad y representatividad de los datos, se desarrollaron diferentes modelos estadísticos para producir coberturas nacionales específicas por edad y por intervalo de cribado, que se transformaron en coberturas para cada año de edad. Los datos faltantes se imputaron. Estas estimaciones se aplicaron a la población de 2019 y se agregaron por región y por nivel de ingresos.

**Resultados:** Identificamos recomendaciones oficiales de cribado de cáncer de cuello de útero en 139 (69%) de los 202 países y territorios. La citología fue la principal prueba de cribado en 109 (78%) de los 139 países. 48 (35%) de los 139 países recomendaban el cribado primario con la prueba de detección del virus del papiloma humano (VPH). La inspección visual con ácido acético fue la prueba más recomendada en entornos de recursos limitados. La cobertura mundial estimada en mujeres de 30 a 49 años fue del 15% en el último año, del 28% en los últimos 3 años, del 32% en los últimos 5 años y del 36% alguna vez en la vida. Un total de 1600 (67%) millones de los 2300 millones de mujeres de 20 a 70 años, incluyendo 662 millones de los 1000 millones de mujeres de 30 a 49 años, nunca se habían sometido a cribado del cáncer de cuello uterino. 133 (84%) millones de los 158 millones de mujeres de 30 a 49 años que vivían en países de ingresos altos se habían sometido a cribado al menos una vez en la vida, en comparación con 194 (48%) millones de los 404 millones de mujeres que vivían en países de ingresos medios-altos, 34 (9%) millones de los 397 millones de mujeres que vivían en países de ingresos medios-bajos, y 8 (11%) millones de los 74 millones de mujeres que vivían en países de ingresos bajos.

**Interpretación:** Dos de cada tres mujeres de 30 a 49 años nunca se han sometido a cribado de cáncer de cuello uterino. La implementación del cribado es muy limitada en países de ingresos medios y bajos, que son los que tienen una mayor carga de la enfermedad. La intensificación de los sistemas de vigilancia tanto respecto la cobertura y el control de la calidad son los principales desafíos para alcanzar la meta de eliminación establecida por la OMS.

Financiación: Instituto de Salud Carlos III, Fondo Europeo de Desarrollo Regional, Secretaría de Universidades e Investigación del Departamento de Empresa y Conocimiento de la Generalitat de Catalunya y, Horizonte 2020.

**Palabras clave:** cáncer de cuello uterino, recomendaciones de cribado, eliminación, cobertura de cribado
