# Supplementary material for: Cervical cancer screening programmes and age-specific coverage estimates for 202 countries and territories worldwide: a review and synthetic analysis
Source: PubMed Central journal article supplement — Lancet Glob Health. 2022 Jul 12;10(8):e1115–27. doi: 10.1016/S2214-109X(22)00241-8 (PMC9296658; doi:10.1016/s2214-109x(22)00241-8), 2022-07-12
Supplement: mmc3.pdf [file mmc3.pdf]

# THE LANCET

## Global Health

### Supplementary appendix 3

This appendix formed part of the original submission and has been peer reviewed. We post it as supplied by the authors.

Supplement to: Bruni L, Serrano B, Roura E, et al. Cervical cancer screening programmes and age-specific coverage estimates for 202 countries and territories worldwide: a review and synthetic analysis. *Lancet Glob Health* 2022; **10**: e1115–27.

## Contents

|                                                                                                                                                                                                                            |    |
|----------------------------------------------------------------------------------------------------------------------------------------------------------------------------------------------------------------------------|----|
| Methods S1. Search terms, translations.....                                                                                                                                                                                | 3  |
| S1.1. Search terms.....                                                                                                                                                                                                    | 3  |
| S1.2. Data extraction and translations.....                                                                                                                                                                                | 3  |
| Methods S2. Data pre-processing.....                                                                                                                                                                                       | 4  |
| S2.1. Data cleaning.....                                                                                                                                                                                                   | 4  |
| S2.1.1. Country-specific corrections and assumptions for coverage data.....                                                                                                                                                | 4  |
| S2.1.2. Country-specific assumptions in programme data:.....                                                                                                                                                               | 5  |
| S2.2. Data transformation.....                                                                                                                                                                                             | 5  |
| S2.2.1. Country-specific disaggregation of coverage data by age.....                                                                                                                                                       | 6  |
| Methods S3. Statistical procedures.....                                                                                                                                                                                    | 8  |
| S3.1. Linear interpolation.....                                                                                                                                                                                            | 8  |
| S3.2. Predictive Mean Matching using Multiple Imputation.....                                                                                                                                                              | 8  |
| S3.3. Last observation carried forward / Next observation carried backward.....                                                                                                                                            | 9  |
| S3.4. Bootstrapping to calculate confidence intervals (CIs).....                                                                                                                                                           | 9  |
| Methods S4. Treatment of missing coverage data.....                                                                                                                                                                        | 11 |
| S4.1. Stepwise algorithm to impute missing specific single age data coverage.....                                                                                                                                          | 11 |
| S4.1.1. Algorithm in countries with at least one coverage datapoint.....                                                                                                                                                   | 11 |
| S4.1.2. Algorithm in countries without coverage datapoints.....                                                                                                                                                            | 12 |
| S4.2. Validation of the algorithm.....                                                                                                                                                                                     | 12 |
| S4.2.1. Simulations.....                                                                                                                                                                                                   | 12 |
| S4.2.2. Sensitivity analyses for the imputation algorithm.....                                                                                                                                                             | 13 |
| S4.2.3. Impact of imputations in the results.....                                                                                                                                                                          | 14 |
| Methods S5. WHO official country consultation.....                                                                                                                                                                         | 15 |
| Figures S1.1, S1.2 and S1.3. Distribution of original coverage data by age and screening interval.....                                                                                                                     | 16 |
| Figure S1.1. Distribution of original coverage data by single age and screening interval among countries with similar pattern.....                                                                                         | 17 |
| Figure S1.2. Distribution of original coverage data by single age and screening interval among countries with different pattern in older ages for the ever in lifetime coverage compared to other screening intervals..... | 18 |
| Figure S1.3. Distribution of original coverage data by single age and screening interval among countries with different pattern for the ever in lifetime coverage compared to other screening intervals.....               | 19 |
| Figures S2.1 and S2.2. Density plots of missing data using Predictive Mean Matching.....                                                                                                                                   | 20 |
| Figure S2.1. Density plots of original and imputed data including in the model the 164 countries with at least one datapoint (Step 3a of the imputation algorithm).....                                                    | 20 |
| Figure S2.2. Density plots of original and imputed data including in the model all countries (Step 4 of the imputation algorithm).....                                                                                     | 20 |
| Figure S3. Imputation method used to estimate missing data by age and country.....                                                                                                                                         | 21 |
| Figure S4. Correlation between imputed data and original data for 50 simulations.....                                                                                                                                      | 27 |
| Figure S5. Differences between imputed data and original data, excluding one by one each country.....                                                                                                                      | 28 |

|                                                                                                                                                                                                  |    |
|--------------------------------------------------------------------------------------------------------------------------------------------------------------------------------------------------|----|
| Table S1. Data sources for screening coverage, by country.....                                                                                                                                   | 29 |
| Table S2. Data sources for cervical cancer screening recommendations by country. ....                                                                                                            | 39 |
| Tables S3.1 and S3.2. Coverage datapoints available by age and screening interval. ....                                                                                                          | 49 |
| Table S3.1. Number and percentage of single ages with coverage datapoints, and number of countries with and without coverage data by screening interval, among women aged 20 to 70 years. ....   | 49 |
| Table S3.2. Number and percentage of single ages with coverage datapoints, and number of countries with and without coverage data by screening interval, among women aged 30 to 49 years. ....   | 49 |
| Table S4. Stepwise algorithm to impute missing coverage data for each single age.....                                                                                                            | 50 |
| Table S5. Impact of the imputation algorithm in the estimations.....                                                                                                                             | 52 |
| Table S6. Sensitivity analysis of screening coverage estimates for women aged 30-49 years under different scenarios of age.....                                                                  | 54 |
| Figure S6.1. Screening coverage estimates for women aged 30-49 years under different scenarios of age, worldwide and by income level.....                                                        | 55 |
| Table S7. Sensitivity analysis of the screening coverage estimates for women aged 30-49 years under different scenarios of income and region.....                                                | 56 |
| Figure S7.1. Screening coverage estimates for women aged 30-49 years under different scenarios of income level. ....                                                                             | 57 |
| Figure S7.2. Screening coverage estimates for women aged 30-49 years under different scenarios of SDG regions. ....                                                                              | 58 |
| Table S8. Sensitivity analysis of screening coverage estimates for women aged 30-49 years under different missing imputation algorithms.....                                                     | 59 |
| Figure S8.1. Screening coverage estimates for women aged 30-49 years under different missing imputation algorithms, worldwide and by income level.....                                           | 61 |
| Table S9. Sensitivity analysis of screening coverage estimates for women aged 30-49 years under different assumptions of screening coverages (from 0% to 100%) for missing values. ....          | 62 |
| Figure S9.1. Screening coverage estimates for women aged 30-49 years under different assumptions of screening coverages (from 0% to 100%) for missing values, worldwide and by income level..... | 64 |
| Table S10. Estimates of cervical cancer screening coverage in women aged 25-65 years by 2019.....                                                                                                | 65 |
| References .....                                                                                                                                                                                 | 67 |

## **Methods S1. Search terms, translations.**

### **S1.1. Search terms**

The systematic review included an initial search in official websites of countries that publish information on cancer control plans, screening policies and coverage statistics (e.g., health departments and national epidemiological centres) followed by a global review using web search engines to look for additional web-based materials. Search terms included specific country names and the following keywords “HPV”, “screening”, “cervical cancer”, “cytology”, “pap smear”, “papanicolau”, “VIA”, “VILI”, “coverage”, “uptake”, including the abbreviated versions and its variations (e.g. “VIA”, Visual Inspection with Acetic Acid, early detection of cancer...)

The algorithm also included a systematic search in PubMed using a combination of MESH terms and keywords relevant to “cervical cancer”, “screening”, and “coverage” for each specific country.

### **S1.2. Data extraction and translations**

Six reviewers were involved in the search and data extraction. This process was done directly, without the help of translation, for publications in Romance languages or English. Eleven professional translators assisted investigators in the search of information and the interpretation of the data for 37 countries in which official languages are Arabic, Russian, Ukrainian, Armenian, Serbian, Croatian, Bosnian, Macedonian, Montenegrin, Slovenian, Polish, Romanian, Greek, Czech, Slovak, Hindi, Urdu, Persian, and Standard Chinese.

## Methods S2. Data pre-processing.

Official cervical cancer screening recommendations and coverage data (for at least one of the five screening intervals: previous year, previous two years, previous three years, previous five years, ever in lifetime) were identified in 139 and 164 out of 202 WHO member states and associated countries and territories, respectively (Tables S1-S2).

A global database with 10 302 single ages from 20 to 70 years and 202 countries was constructed including the identified information on screening recommendations and coverages. Below we describe the process of data selection and transformation.

### S2.1. Data cleaning

#### S2.1.1. Country-specific corrections and assumptions for coverage data

For five countries, the coverage of an interval different from those included in the analysis was assigned as the country coverage (Table MS2.1.1.1). For Sweden, Papua New Guinea, and Norway, we assigned the previous eight-, 10- and 25-year coverage, respectively, as the ever in lifetime coverage. For France and England-United Kingdom, we assigned the previous 3.5 years coverage as the previous three years coverage.

**Table MS2.1.1.1. Summary of original and new assigned screening intervals among countries with screening intervals not included in the analysis.**

| Country                  | Age Range | Original screening interval |   | New screening interval |
|--------------------------|-----------|-----------------------------|---|------------------------|
| Sweden                   | 23-60 y   | Previous 8 years            | → | Ever in lifetime       |
| Papua New Guinea         | 20-59 y   | Previous 10 years           | → | Ever in lifetime       |
| Norway                   | 16+ y     | Previous 25 years           | → | Ever in lifetime       |
| France                   | 25-65 y   | Previous 3.5 years          | → | Previous 3 years       |
| England (United Kingdom) | 20+ y     | Previous 3.5 years          | → | Previous 3 years       |

y: years.

For United Kingdom we did not have a global national coverage, but four regional coverages (England, Scotland, Wales, Northern Ireland). We calculated the national coverage applying the proportion of population that each region contributes to the national coverage (82.3% England, 8.1% Scotland, 4.7% Wales, 2.8% Northern Ireland). For ages 20-24 years and 65-70 years, and for screening intervals of three- and five-years, we only had screening coverage from England, so we assumed this coverage as the national one.

For each single-age and country, we verified that no original coverage exceeded that of its upper screening interval (coverage previous year < coverage previous two years < coverage previous three years < coverage previous five years < coverage ever in lifetime). This rule was not satisfied in seven countries (Table MS2.1.1.2). For Germany (cov 1-year > cov 3-year and ever, age group 20-24 years), Uruguay (cov 1-, 3-, 5-year > cov ever, age 20 years; cov 1-year > cov 3-year, age 70 years), Belgium (cov 2-year > cov ever, age group 20-24 years), Estonia (cov 3-, 5-year > cov ever, age group 20-24 years), and Czechia (cov 5-year > cov ever, age group 20-24 years) the aggregated coverage for the mentioned age groups (in brackets) systematically included ages outside 20 to 70 years and therefore we decided to not use this data when discrepancies appeared and treat this coverage as missing. For Iceland and Kenya, the rule was satisfied when the disaggregated ever in lifetime distribution was applied to disaggregate the 1-, 3-, and 5-year aggregated coverages (see section S2.2).

**Table MS2.1.1.2. Summary of the original and corrected screening data when the coverage rule was not satisfied, by country.**

| Country | Original screening data (%) |      |      |      |             |   | Corrected screening data (%) |           |           |           |             |
|---------|-----------------------------|------|------|------|-------------|---|------------------------------|-----------|-----------|-----------|-------------|
|         | Age                         | 1y   | 3y   | 5y   | Ever        |   | Age                          | 1y        | 3y        | 5y        | Ever        |
| Germany | 15-24 y                     | -    | 54.7 | -    | 56.5        | → | 20-24 y                      | 59.2      | NA        | -         | NA          |
|         | 20-24 y                     | 59.2 | -    | -    | -           |   |                              |           |           |           |             |
| Uruguay | 15-20 y                     | -    | -    | -    | 14.9        | → | 20 y                         | 20.7      | 46.3      | 55.6      | NA          |
|         | 18-29 y                     | 20.7 | 46.3 | 55.6 | -           |   |                              |           |           |           |             |
| Uruguay | 70-79 y                     | 3.2  | 2.1  | 3.4  | -           | → | 70 y                         | 3.2       | NA        | 3.4       | -           |
| Belgium | 15-24 y                     | -    | -    | -    | 33.7        | → | 20-24 y                      | See Sec.3 | 46.7      | -         | NA          |
|         | 20-24 y                     | -    | 46.7 | -    | -           |   |                              |           |           |           |             |
|         | 20-69 y                     | 33.3 | -    | -    | -           |   |                              |           |           |           |             |
| Estonia | 16-24 y                     | -    | -    | -    | 34.4        | → | 20-24 y                      | 28.7      | 53.7      | 62.3      | NA          |
|         | 20-29 y                     | 28.7 | 53.7 | 62.3 | -           |   |                              |           |           |           |             |
| Czechia | 15-24 y                     | -    | -    | -    | 66.6        | → | 20-24 y                      | 48.5      | -         | 69.7      | NA          |
|         | 15-29 y                     | 48.5 | -    | 69.7 | -           |   |                              |           |           |           |             |
| Iceland | 23-65 y                     | -    | 67.0 | -    | Data disag. | → | 23-65 y                      | -         | See Sec.2 | -         | Data disag. |
| Kenya   | 25-49 y                     | 2.9  | 7.3  | 12.3 | Data disag. | → | 25-49 y                      | See Sec.2 | See Sec.2 | See Sec.3 | Data disag. |

y: year; NA: Not Available; Data disag: Data disaggregated, Sec: Section.

### S2.1.2. Country-specific assumptions in programme data:

To perform the statistical analysis, we had to assign a missing screening interval for the recommendations in 10 countries. When the primary screening test was VIA (Guinea, Madagascar, Mozambique, and Timor-Leste) or cytology (Dominica, Cyprus, Vanuatu, Cook Islands, and Syria), we assumed a 5-year interval. Particularly for Sri Lanka, we assumed a 10-year interval because the screening recommendations indicate that cytology should be performed at ages 35 and 45 years.

For 11 countries (Belgium, Cyprus, Portugal, Romania, South Africa, Paraguay, Vanuatu, China, Syria, Timor-Leste, and Cook Islands) we assumed that there was no screening invitation as no data on screening invitation was identified in the original sources.

In eight countries, the antiquity of the screening programme (years since the introduction of the screening programme in the country) was missing (Cyprus, Guinea, Antigua & Barbuda, Grenada, St Lucia, Vanuatu, Timor-Leste, Cook Islands), and we assumed less than 10 years for all of them as a more conservative decision.

In eight countries (United Arab Emirates, Belgium, Canada, Italy, Portugal, Spain, and United Kingdom) more than one programme recommendation was registered (e.g., different regional recommendations, or recommendations only in some regions of the country). We selected the one considered more representative of the country population.

In 19 countries (American Samoa, Bermuda, Bolivia, Brunei, Chile, Colombia, Ecuador, El Salvador, Guatemala, Mexico, Myanmar, Malaysia, Nicaragua, Panama, Paraguay, Peru, Puerto Rico, USA and, South Africa) more than one screening test was recommended for a specific age group (e.g., cytology or VIA for women aged 30-49 years). We selected the most used test or the one preferred in national recommendations.

### S2.2. Data transformation

Screening coverages were reported aggregated by age groups of five years, ten years, or more. Coverages were transformed into single age datapoints by assigning the same coverage to all ages in the reported age group.

### S2.2.1. Country-specific disaggregation of coverage data by age

For seven countries (Belgium, Iceland, Israel, Kenya, Peru, Slovenia, and Turkey) with reporting coverages for wide age range groups (e.g., 30-65 years), we modified the aggregated data using the age disaggregated distribution from other screening intervals within the same country (Table MS2.2.1.1). We disaggregated the data multiplying the original aggregated data by the disaggregated distribution of other screening interval, and then dividing by the mean of the disaggregated data of another screening interval. For example, for a specific country, we have aggregated data for the previous year coverage interval among women aged 20-70 years, and disaggregated data for the previous three years coverage interval in a five-year age group. To calculate the new disaggregated data for the coverage of the previous year interval, we applied the following formula for each disaggregated age group:

New disaggregated previous year coverage for 20-24 years = Original aggregated previous year coverage for 20-70 years \* Original disaggregated previous three years coverage for 20-24 years / mean (Original disaggregated previous three years coverage for 20-70 years)

**Table MS2.2.1.1. Summary of countries and screening intervals with aggregated data that could be disaggregated.**

| Country  | Age Range | Screening intervals with aggregated data | Screening intervals with disaggregated data |
|----------|-----------|------------------------------------------|---------------------------------------------|
| Belgium  | 20-69 y   | 1-y, 2-y                                 | 3-y                                         |
| Iceland  | 23-65 y   | 3-y                                      | ever                                        |
| Israel   | 35-54 y   | 3-y                                      | 2-y                                         |
| Kenya    | 25-49 y   | 1-y, 3-y, 5-y                            | ever                                        |
| Peru     | 30-49 y   | 1-y                                      | 3-y                                         |
| Slovenia | 30-49 y   | 1-y, 5-y, ever                           | 3-y                                         |
| Turkey   | 30-65 y   | 1-y, 3-y, 5-y                            | 2-y                                         |

y: year.

Disaggregated data from other sources not included in the final database were also used to disaggregate data for the Republic of Moldova, Serbia, and Colombia (Table MS2.2.1.2).

**Table MS2.2.1.2. Summary of countries and screening intervals with aggregated data that could be disaggregated using disaggregated data from other sources not included in the final analysis.**

| Country             | Age Range | Screening intervals with aggregated data | Screening intervals with disaggregated data from sources not included in the final analysis |
|---------------------|-----------|------------------------------------------|---------------------------------------------------------------------------------------------|
| Republic of Moldova | 25-61 y   | 1-y, 3-y                                 | 1-y, 3-y                                                                                    |
| Serbia              | 25-64 y   | 3-y, ever                                | 3-y                                                                                         |
| Colombia            | 25-69 y   | 1-y                                      | 1-y                                                                                         |

y: year.

For one country (Gabon), we modified the aggregated out of programme data coverage using a corrected factor based on disaggregated data from countries with same income and antiquity of screening programme.

For Gabon we had aggregated data for the previous year and previous three years coverage among women aged 20-70 years. The screening programme recommends to screen women between 25-65 years, so ages 20-24 years and 66-70 years are out of programme. We calculated a correction factor including the mean disaggregated data of the previous year and previous three years intervals from those countries with the same income and antiquity of screening programme (Georgia, Jamaica, Romania). In summary, to calculate the new disaggregated out of programme data for the previous year and previous three years coverage intervals, we applied the following formula:

New disaggregated previous year and previous three years coverage for 20-24 years = Original aggregated previous year and previous three years coverage for 20-24 years \* mean (previous year and previous three years disaggregated coverage for 20-24 years from Georgia, Jamaica, Romania) / mean

(Original previous year and previous three years aggregated coverage for 20-70 years). We also recalculated the data for those ages included in the screening programme (25-65 years) to obtain the same mean aggregated data for 20-70 years.



## Methods S3. Statistical procedures.

To produce global estimates of screening coverage we developed a multi-step algorithm to impute missing datapoints based on the closest available data (Table S4). This algorithm included the following statistical procedures:

### S3.1. Linear interpolation

Linear interpolation is a mathematical method to estimate new datapoints within the range of a set of known datapoints using linear polynomials<sup>1</sup>. Linear interpolation between two known points is the straight line between these points. We can interpolate as many points as needed between the two known points.

#### *Application*

In our stepwise algorithm, imputation by linear interpolation between screening intervals within the same country was applied first (Table S4: Step 2). We selected ages with at least two coverage datapoints in different screening intervals, and then imputed missing values between them by linear interpolation. This is a conservative strategy that imputes plausible data assuming linear functions between the known coverage datapoints of the different screening intervals.

### S3.2. Predictive Mean Matching using Multiple Imputation

Predictive Mean Matching (PMM) is a semi-parametric statistical imputation method for missing values<sup>2-4</sup>. Imputation by PMM uses an observed value from one value with a similar predictive mean. Compared with standard methods based on linear regression and normal distribution, PMM produces imputed values that are much more like real values sampled from the data. The aim of this process is to reduce the bias introduced in a dataset through imputation. Compared to other imputation methods, it usually imputes less implausible values (e.g., negative incomes) and takes heteroscedastic data into account more appropriately.

The PMM algorithm builds a small subset of observations where the outcome variable matches the outcome of the observations with missing values. Multiple imputation is recommended, repeating the process iteratively at least five times, although it is advantageous to set higher iterations, ranging from 20 to 100<sup>5-6</sup>. It creates several different plausible imputed datasets and combines the results obtained from each of them.

#### *Application*

In our stepwise algorithm, the PMM was applied second when linear interpolation was not possible (Table S4: Step 3a). PMM includes as many relevant covariates in the model as possible to obtain better estimates of missing data. Overfitting (e.g., making it more dependent on your data) is not really a problem and any available associations, small or large, are used.

We included the following covariates:

- *Country characteristics:* Country, Income level (four and three categories), Human Development Index (HDI; four categories and quantitative), Fragile and Conflict affected Situations (FCS, dichotomous yes/no), Small State or territory (SST, dichotomous yes/no), Continent (five categories), Sustainable Development Goals (SDG) regions (eight categories), United Nations (UN) subregions (22 categories), Country (202 categories).
- *Coverage characteristics:* single age (20 to 70 years), range in years of the coverage figure (i.e., if coverage was reported for the age group of 25-29 years old, this corresponds to a range of five years), estimation year (year of estimation of the original coverage).
- *Programme characteristics:* existence of screening recommendations (dichotomous yes/no), use of personal invitation to screening (dichotomous yes/no), whether age was included in the recommended screening ages (dichotomous yes/no), whether the year of original reported coverage corresponds to the date of the current screening recommendations (dichotomous yes/no), antiquity of the programme (dichotomous  $\leq 10$  years/ $> 10$  years).

We built several models including a combination of the covariates. The final PMM model included the following covariates: single age (20 to 70 years), range in years of the age group in which the coverage was reported, existence of screening recommendations (dichotomous yes/no), whether the age was included in the recommended screening ages (dichotomous yes/no), individual invitation to screening (dichotomous yes/no), whether the year of the reported coverage corresponds to the date of the current recommendations (dichotomous yes/no), HDI (as quantitative), UN geographical subregion (22 categories), whether the country was under FCS (dichotomous yes/no), whether the country is an SST (dichotomous yes/no). Some covariates, such as country, could not be included in the model because the PMM model detected multi-collinearity and results could be instable.

Multiple imputation was applied, creating 40 imputed datasets from the interim dataset obtained after steps 3b and 3c (Table S4) in which all countries with at least one observed coverage datapoint had all datapoints filled. Resulting databases without missing data included the 202 (countries) \* 51 (single ages from 20 to 70) records, resulting on 10 302 records in each dataset (a total of 412 080 records).

### **S3.3. Last observation carried forward / Next observation carried backward**

Single imputation methods replace a missing datapoint by a single value, and analyses are conducted as if all the data were observed. In Last Observation Carried Forward (LOCF) and Next Observation Carried Backward (NOCB) single imputation methods, the single value used to fill in the missing datapoint comes from the observed values in the same subject<sup>7-8</sup>. LOCF imputes the last measured value before the missing value and carries it forward. NOCB is a similar approach to LOCF but works in the opposite direction, by imputing the first observation after the missing value and carrying it backward. These techniques are common statistical approaches to the analysis of longitudinal repeated measures where some follow-up observations may be missing.

#### *Application*

In our stepwise algorithm, LOCF or NOCB were applied third, if linear interpolation was no applicable and PMM was not used because we do not have any coverage for those ages (Table S4: Step 3b). Within countries with single ages with missing data, we carried forward or backward the mean of the last/first five observations as long as the ages had the same screening recommendations. Its use was restricted to a maximum carrying of 5 datapoints to avoid overrepresentation of one specific imputed datapoint.

### **S3.4. Bootstrapping to calculate confidence intervals (CIs)**

It is important to consider inference of the estimates after multiple imputation. When estimates are calculated using non-parametric models (e.g., PMM method), it is unclear how to obtain valid inference, meaning obtain standard errors, and therefore confidence intervals). Bootstrap estimation may be an option<sup>9</sup>.

In general, we can distinguish between two approaches for bootstrap inference when using multiple imputation: M imputed datasets are created and bootstrap estimation is applied to each of them, or B bootstrap samples of the original dataset (including missing values) are drawn and in each of these samples, the data is imputed. Taking this into account, there are four different approaches to combine results and calculate confidence intervals using bootstrap:

- Multiple Imputation Boot (pooled sample): Multiple imputation is utilized for the dataset D. For each of the M imputed dataset, B bootstrap samples are drawn. In each of these datasets, the point estimates are calculated. The pooled sample of ordered estimates is used to construct the confidence interval.
- Multiple Imputation Boot: Multiple imputation is utilized for the dataset D. For each of the M imputed dataset, B bootstrap samples are drawn. The bootstrap samples are used to estimate the standard error in each imputed dataset, resulting in M point estimates and M standard errors. Confidence interval is constructed using, possibly, t distribution.
- Boot Multiple Imputation (pooled sample): B bootstrap samples, including missing data, are drawn and multiple imputation is utilized in each bootstrap sample. There are B x M imputed datasets which can be used to obtain the corresponding point estimates, and then the set of pooled ordered estimates can be used to construct the confidence interval.

- **Boot Multiple Imputation:** B bootstrap samples, including missing data, are drawn and each of them is imputed M times. There are M imputed datasets associated with each bootstrap sample. They can be used to obtain the corresponding point estimates, and the set of ordered estimates can be used to construct the confidence interval.

#### *Application*

In our stepwise algorithm, we used the first approach of Multiple Imputation Boot (using pooled sample) to calculate the confidence intervals of our estimates. We had to decide in advance the ages and regions for which we wanted to produce the screening coverage estimates (i.e., worldwide among women aged 30-49 years, by income among women aged 25-65 years).

Therefore, from the complete database that included the 40 imputations (412 080 records), we calculated, for a previously defined age group and region, the number of women screened for each of the 40 imputed datasets. Then, we computed, for the 40 estimated numbers, 3 000 bootstrap estimations, we combined these 3 000 estimated numbers of screened women from the 40 imputations, and we computed the confidence interval using the 2.5% and 97.5% quantiles. The same process was done for each screening interval, and for each selected age group and region.

## Methods S4. Treatment of missing coverage data.

As previously mentioned, coverage data was available for at least one of the five screening intervals for 164 out of 202 WHO member states and associated countries and territories, covering a combination of 7 324 single age datapoints: 3 239 point estimates were available for the previous year, 1 110 for the previous two years, 3 451 for the previous three years, 1 580 for the previous five years, and 5 472 for the ever in lifetime.

From a total of 51 510 point estimates (202 countries x 51 single ages from 20 to 70 years x 5 screening intervals), we had available information for 14 852 (28.8%) point estimates. Coverage data was unavailable for 38 countries, corresponding to 1938 single age datapoints and 9960 point estimates (Table MS4).

**Table MS4. List of countries without information on screening coverage**

| CONTINENT   | COUNTRIES (N=38)                                                                                                                                                                                                                          |
|-------------|-------------------------------------------------------------------------------------------------------------------------------------------------------------------------------------------------------------------------------------------|
| Europe (3)  | North Macedonia, Monaco, San Marino                                                                                                                                                                                                       |
| Africa (20) | Angola*, Burundi*, Central African Republic*, DR Congo*, Djibouti*, Equatorial Guinea*, Eritrea*, Gambia*, Guinea, Guinea Bissau*, Liberia*, Libya*, Niger*, Nigeria*, Rwanda, Seychelles*, Sierra Leone*, South Sudan*, Tanzania*, Togo* |
| America (4) | Antigua & Barbuda, Panama, Suriname*, Venezuela                                                                                                                                                                                           |
| Asia (6)    | Afghanistan*, Bahrain, Cambodia, DPR Korea, Palestine*, Yemen*                                                                                                                                                                            |
| Oceania (5) | American Samoa, Cook Islands, Niue*, Samoa, Vanuatu                                                                                                                                                                                       |

\* Countries with no official recommendations for cervical cancer screening identified.

### S4.1. Stepwise algorithm to impute missing specific single age data coverage.

A multi-step algorithm was developed to impute missing datapoints based on the closest available data.

The imputation algorithm was different in countries with at least one coverage datapoint and in countries without any coverage datapoints.

#### S4.1.1. Algorithm in countries with at least one coverage datapoint

Imputation by linear interpolation between screening intervals was firstly applied (Table S4: Step 2). 3 606 single ages had at least two coverage datapoints reported with 6 976 missing coverage datapoints. 4 669 missing datapoints could be imputed by linear interpolation because coverage data was available in upper and lower screening intervals. 2 307 datapoints remained as missing because they could not be imputed by linear imputation (i.e., missing on coverage in the previous year).

For single ages with at least one coverage datapoint and when linear interpolation was not possible, we imputed missing data using the PMM method using the covariates explained in Methods S3 (Table S4: Step 3a). Using the PMM model, 40 imputed databases were created derived from the multiple imputation process. In total, 17 099 coverage datapoints without data from each imputed database were calculated, obtaining complete single ages for the five screening intervals for the 164 countries with at least one coverage datapoint. For each single-age specific imputation, it was verified that no coverage exceeded that of its upper screening interval (coverage 1-year <coverage 2-year <coverage 3-year <coverage 5-year <coverage ever). When this rule was not met, coverage was recalculated as follows: original data was preserved, imputed coverage datapoints were reordered assigning the minimum imputed value to the lowest screening interval and the maximum imputed value to the greatest screening interval, intermediate coverage datapoints without original data were assigned as missing (Table S4: Step 5). When the minimum or maximum imputed value assigned to a coverage datapoint was greater or lower respectively than the original coverage datapoint, the original coverage datapoint was assigned to the missing values. Finally, the remaining missing datapoints were imputed by linear interpolation between screening intervals. With this strategy 116 154 single ages were corrected among the 40 imputed datasets.

For single ages without coverage datapoints, last observation carried forward or next observation carried backward techniques were applied within the last five observations before or after the missing data (Table S4: Step 3b). This approach was only applied when programme characteristics were the same between single ages. To avoid overrepresentation of one specific imputed datapoint, we carried forward or backward the mean of the last/first five observations. With this strategy, 58 400 coverage datapoints were imputed among the 40 imputed datasets (1 460 datapoints in each imputation).

For the rest of single ages without coverage datapoints, a ponderation rate was applied. This ponderation rate was calculated using the imputed coverage database for each country and five-year age group (20-24, 25-29, ..., 60-64, 65-70) from countries with same income and same single ages included in the screening recommendations (Table S4: Step 3c). With this strategy, 149 600 coverage datapoints were imputed among the 40 imputed datasets (3 740 datapoints in each imputation).

Again, for each single-age specific imputation, it was verified that no coverage exceeded that of its upper screening interval. When the rule was not met, coverage data was reordered, and linear interpolation was applied as previously explained (Table S4: Step 5). A total of 3 544 single ages had to be changed among the 40 imputed datasets.

#### **S4.1.2. Algorithm in countries without coverage datapoints**

Missing screening coverage datapoints for the 38 countries without any original coverage data were imputed by the PMM method, directly applied to the original coverage dataset (Table S4: Step 4). This model included the same covariates used for countries with at least one coverage datapoint available. Using the PMM method, 40 imputed databases were created derived from the multiple imputation process. A total of 9 690 datapoints (38 countries x 51 single ages from 20 to 70 years x 5 screening intervals) from each database were imputed, obtaining complete single ages for the five screening intervals for the 38 countries without any original coverage data.

Again, for each single-age specific imputation, it was verified that no coverage exceeded that of its upper screening interval. When the rule was not met, coverage data was reordered, and linear interpolation was applied as previously explained (Table S4: Step 5). A total of 61 814 single ages were rectified among the 40 imputed databases.

Figure S3 shows the final coverage dataset by country and imputation method.

#### **S4.2. Validation of the algorithm**

Missing data imputation has many assumptions and may produce bias in the screening coverage estimates. Several sensitivity analyses and validations were performed to address and validate our methodological approach to treat missing data.

##### **S4.2.1. Simulations**

###### **a) Comparison between original and imputed data selected randomly**

Fifty simulations were performed taking a random sample of 200 original coverage data for each simulation. These 200 original coverages included different age groups and age ranges (e.g., original coverage data for the previous year was taken for one country for the age group 25-29 years, but for another country the original coverage data for the previous year was taken for the broader age group 25-64 years). After this, the stepwise algorithm to impute missing data was run again treating this data as missing. The 50 simulations performed resulted in 66 672 single age coverages to be imputed. When comparing the imputed data with the original coverage data not used, the correlation coefficient was 0.89 including all simulations combined (Figure S4). In 6 917 out of 66 672 (10.4%) imputed data, the difference with the original data was equal or greater than 15%. Among the rest of imputed data, 10.1% showed a difference between 10-15%, 23.6% a difference between 5-10%, and around 55.9% showed a difference lower than 5%.

###### **b) Comparison between original and imputed data, excluding one by one each country**

All the original coverages from the 164 countries with at least one datapoint were removed and treated as missing data, country by country. Missing data was imputed using the multi-step algorithm, including the imputation of the original removed data for each country. Screening coverages were then estimated worldwide, by income level and by region, obtaining almost identical estimation rates (Figure S5). Differences ranged from 0% to 1% in almost all countries. Despite this, differences between 5-10% depending on the screening interval were observed when data from countries with largest populations were put as missing and imputed (e.g., China, India).

#### **S4.2.2. Sensitivity analyses for the imputation algorithm**

Additionally, sensitivity analyses of the most uncertain assumptions of the stepwise algorithm were performed (Table S4).

##### **a) Restriction of coverage data by age and region**

First, we calculated the coverage estimates for the age group 30-49 years using three different age-scenarios. Scenario one used the complete database with individual coverages for single ages from 20 to 70 years, while scenario two and three restricted the database to individual coverages for the age group from 25 to 65 years and from 30 to 49 years, respectively. Estimations of screening coverage were very similar to the final estimates of our study, worldwide and by income and region (Table S6).

Second, we calculated the coverage estimates for the age group 30-49 years using two region-scenarios. Scenario one included the complete database with coverage data from all regions, while scenario two only included data for countries corresponding to each income level or SGD region. Coverage estimates were very similar compared to the final estimates of our study (Table S7). By income level, imputations including only upper middle-income countries showed differences in the coverage estimates in the previous year close to 7% (from 11% to 18%) compared to imputations including all countries. Differences close to 3% were also observed in all screening intervals when low-income countries were validated. By SGD regions, differences ranged from 2% to 5% in the estimation coverages for some screening intervals in Sub-Saharan Africa, Central & Southern Asia, Eastern & South-Eastern Asia, Latin America & Caribbean, Oceania, and Australia & New Zealand.

##### **b) Sensitivity analyses for steps 1 to 4 of the imputation algorithm**

We carried out a sensitivity analysis of each step of the imputation algorithm, including modification of aggregated and out-of-programme coverage, linear interpolation, LOCF and NOCB techniques, and application of a ponderation rate. Global estimates derived from the non-application of these four steps of the algorithm (Table S4) were consistent compared to the reference ones, with differences close to 1-2% compared to our reference estimates (Table S8). The main differences in the screening coverages were observed when linear interpolation was not used (scenario 3) and PMM was applied instead, where disparities of up to 10% were observed. Specifically, by income, the non-application of linear interpolation resulted in differences in screening coverages ranging from 2 to 4% in low-income countries, although results were similar for the other income regions. By region, the greatest differences were observed in Western Africa (close to 10%) and ranging from 4 and 5% in Western Asia and Australia & New Zealand.

We also did a sensitivity analysis considering a group of scenarios where all coverages from countries without data were set to 0%, 25%, 50%, and 75-100%. We applied these values to each screening interval. In the most extreme scenarios, global estimates were 1% lower when missing data was set to 0 (scenario 2) and 6% higher when missing data was set to 75-100% (scenario 5) (Table S9). The impact of these assumptions was more prominent in low-income countries, with estimates between 2 to 6% lower (scenario 2) or between 33 to 39% higher (scenario 5). This impact was almost negligible in high- and upper-middle-income countries. Differences by income could be explained by a higher number of missing data in lower-middle- and low-income countries compared to high- and upper-middle-income countries. By region, we observed similar patterns, with estimates 56 to 60% higher (scenario 5) in Sub-Saharan Africa (excluding Southern Africa), 19 to 23% higher (scenario 5) in Polynesia and 8 to 9% higher (scenario 5) in Western Asia.

### **S4.2.3. Impact of imputations in the results**

The impact of the imputation algorithm in the global estimates varied substantially depending on the population of the country for each single age between 20 and 70 years old (Table S5). We could obtain coverage data from original sources for 7 324 single ages, corresponding to 14 852 datapoints considering all the screening intervals (29%) (Table S3). When population weights are considered, the 14 852 datapoints represented 59% of the targeted women instead of 29%, meaning that more than half of coverage data used to estimate the number of screened women came from the original sources.

Regarding the imputed datapoints (71%), 9% were derived from linear interpolation, representing 13% of targeted population (Step 2). 33% of datapoints were imputed by the PMM method, corresponding to 36% of targeted population (Step 3a). Around 10% of datapoints were imputed using the approach of LOCF and NOCB, or a ponderation rate based on other country coverage datapoints with similar characteristics, representing less than 0.1% (Steps 3b and 3c) of targeted population. Step 4, that included PMM imputation for countries without data, was the one with more associated uncertainty because imputation of coverages came from the rest of countries. About 19% of datapoints were imputed through this methodology, representing 3% of targeted population.

## Methods S5. WHO official country consultation.

Following WHO's quality standards for data publication an official consultation round with WHO member states and associated countries was conducted from November 27th, 2020, to February 12th, 2021, to review, comment and provide insight on the estimates. Countries were presented with draft estimates and sources of data. The country consultation was responded by 83 countries, resulting in an update of screening policies and coverages in 33 and 42 countries, respectively.

**Table MS5.1. List of countries that responded to the WHO country consultation**

| Continent           | Countries (N=83)                                                                                                                                                                                                                                                                                                         |
|---------------------|--------------------------------------------------------------------------------------------------------------------------------------------------------------------------------------------------------------------------------------------------------------------------------------------------------------------------|
| <b>Europe (27)</b>  | Austria, Belarus, Belgium, Bulgaria, Croatia, Czechia, Denmark, Estonia, Finland, France, Germany, Greece, Hungary, Latvia, Lithuania, Luxembourg, Netherlands, North Macedonia, Norway, Poland, Portugal, Russian Federation, Slovakia, Slovenia, Spain, United Kingdom (England - Scotland - Northern Ireland - Wales) |
| <b>Africa (13)</b>  | Burkina Fasso, Côte d'Ivoire, Egypt, Ethiopia, Gabon, Kenya, Madagascar, Mali, Mauritius, Morocco, Niger, Tchad, Uganda                                                                                                                                                                                                  |
| <b>America (16)</b> | Bahamas, Brazil, Canada, Chile, Colombia, Costa Rica, Cuba, Ecuador, Guyana, Haiti, Jamaica, Panama, Peru, Trinidad & Tobago, Uruguay, United States of America                                                                                                                                                          |
| <b>Asia (23)</b>    | Afghanistan, Brunei, Cambodia, China, Hong Kong SAR, India, Iran, Israel, Japan, Jordan, Republic of Korea, Lebanon, Malaysia, Myanmar, Nepal, Oman, Philippines, Qatar, Singapore, Syria, Thailand, Turkey, Viet Nam                                                                                                    |
| <b>Oceania (4)</b>  | Australia, French Polynesia, Niue, Solomon Islands                                                                                                                                                                                                                                                                       |

**Table MS5.2. List of countries providing additional information on screening recommendations**

| Continent          | Countries (N=33)                                                                                                                      |
|--------------------|---------------------------------------------------------------------------------------------------------------------------------------|
| <b>Europe (14)</b> | Belarus, Bulgaria, Croatia, Denmark, Finland, France, Germany, Greece, Hungary, Poland, Portugal, Russian Federation, Slovakia, Spain |
| <b>Africa (4)</b>  | Gabon, Kenya, Mauritius, Uganda                                                                                                       |
| <b>America (6)</b> | Bahamas, Canada, Colombia, Guyana, Peru, Trinidad & Tobago                                                                            |
| <b>Asia (9)</b>    | Brunei, Hong Kong SAR, Japan, Republic of Korea, Malaysia, Myanmar, Qatar, Singapore, Thailand                                        |
| <b>Oceania (0)</b> | -                                                                                                                                     |

**Table MS5.3. List of countries providing additional information on screening coverages**

| Data                      | Countries (N=42)                                                                                                                                                                                                                                                                       |
|---------------------------|----------------------------------------------------------------------------------------------------------------------------------------------------------------------------------------------------------------------------------------------------------------------------------------|
| <b>New data (4)</b>       | Gabon, Madagascar, French Polynesia, Syria                                                                                                                                                                                                                                             |
| <b>Updated data (38)*</b> | Austria, Czechia, Denmark, Estonia, Finland, France, Greece, Hungary, Latvia, Luxembourg, Republic of Moldova, Netherlands, Norway, Slovenia, United Kingdom, Ethiopia, Kenya, Morocco, Bahamas, Brazil, Canada, Colombia, Jamaica, Peru, Uruguay, United States of America, Australia |

\*38 countries with previous data (updated or more disaggregated data)



### **Figures S1.1, S1.2 and S1.3. Distribution of original coverage data by age and screening interval.**

To assess whether the pooled coverage data for one screening interval could be disaggregated using the distribution from other screening intervals with more disaggregated data within the same country, we compared the distribution of the original data among screening intervals in the 63 countries with original disaggregated data for more than one screening interval. We specifically assessed whether the ever in lifetime distribution was comparable to the other screening intervals distribution.

Visually, we identified 40 countries with the ever in lifetime distribution comparable to other screening intervals distributions (Armenia, Bangladesh, Barbados, Belgium, Benin, Bermuda, Bulgaria, Cabo Verde, Cameroon, Canada, China, Costa Rica, Germany, Denmark, Dominica, Dominican Republic, Grenada, Haiti, Hong Kong, Israel, Korea, Latvia, Lesotho, Marshall Islands, Nepal, Nicaragua, Palau, Paraguay, Portugal, Romania, Russian Federation, Sweden, Trinidad and Tobago, Tunisia, Saint Kitts and Nevis, Saint Lucia, Saint Vincent and the Grenadines, South Africa, Switzerland, Zimbabwe) (Figure S1.1). In 22 countries different distributions were observed, mainly among older ages (from 50-60 years) (Austria, Brunei Darussalam, Croatia, Cyprus, Czechia, El Salvador, Estonia, France, Greece, Honduras, Hungary, Jamaica, Lithuania, Luxembourg, Malta, Norway, Poland, Singapore, Slovakia, Spain, Uruguay, United States) (Figure S1.2), and only one country had different distribution for all age groups (The Netherlands) (Figure S1.3). Considering this, we assumed that age-distribution was similar among screening intervals. Statistical tests could not be performed to verify this assumption because coverage data was not independent among screening intervals and the number of datapoints was too small.

**Figures S1.1, S1.2 and S1.3** show the distribution of ever in lifetime coverage (y-axis) compared with other screening intervals, by single age (x-axis) and screening interval (lines).

**Figure S1.1. Distribution of original coverage data by single age and screening interval among countries with similar pattern.**

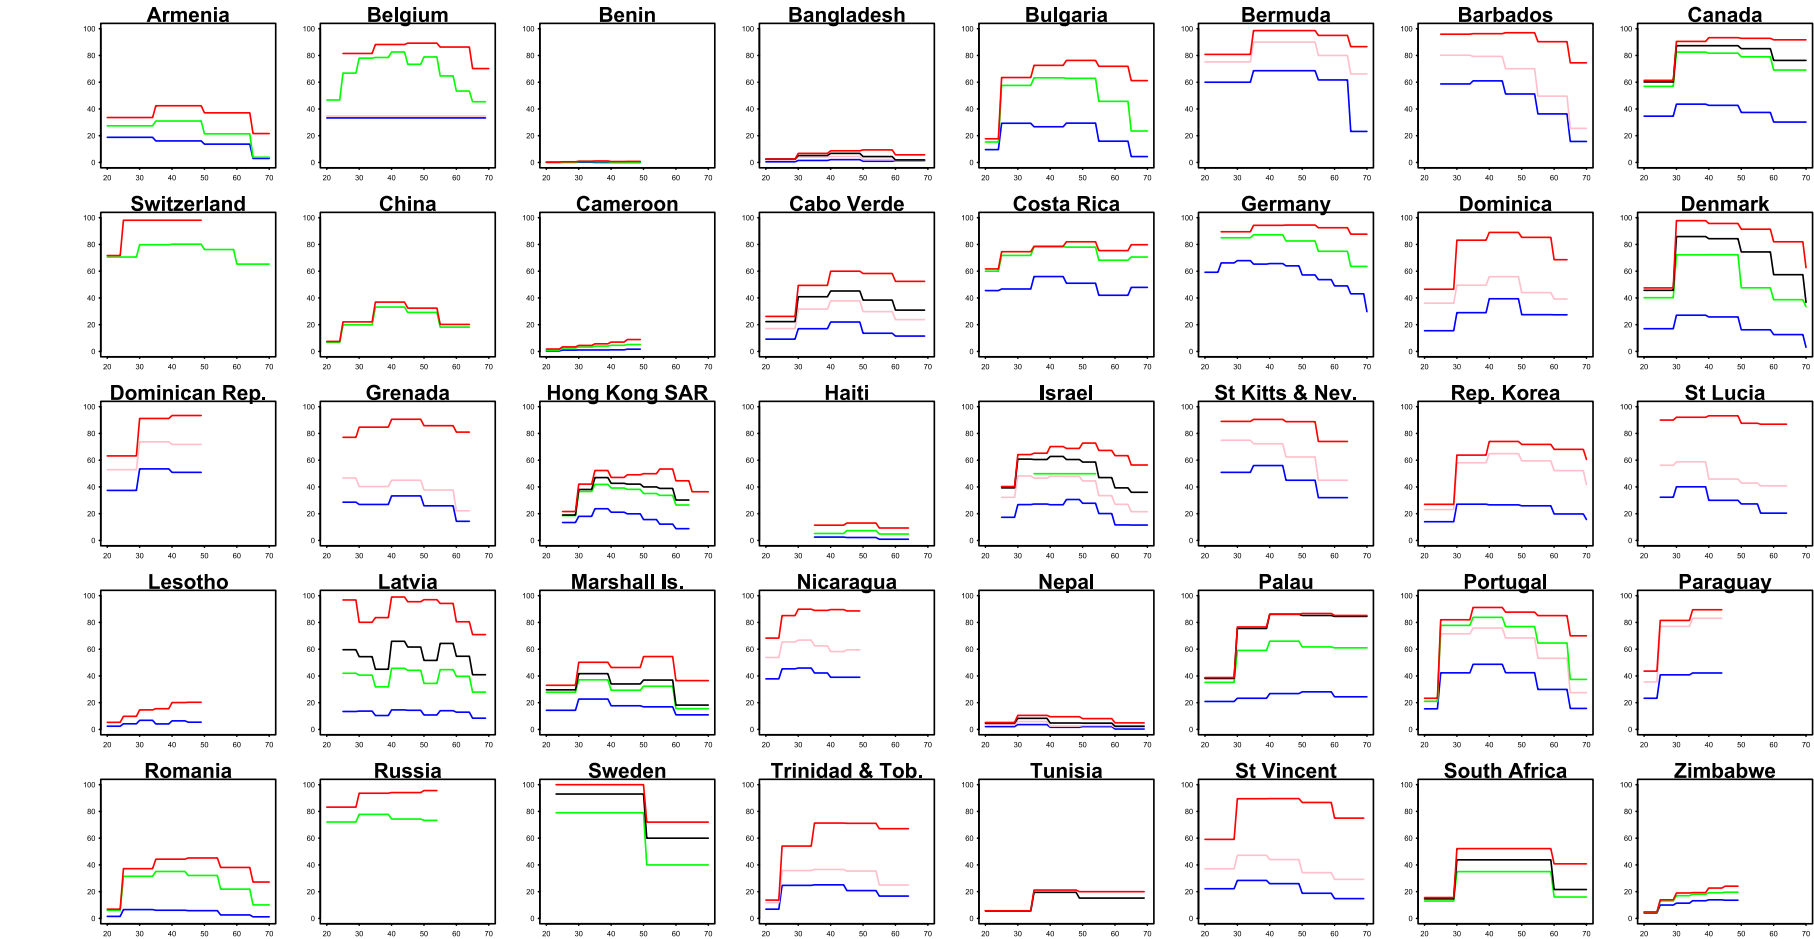

Blue line: previous year; Pink line: previous two years; Green line: previous three years; Black line: previous five years; Red line: ever in lifetime.

**Figure S1.2. Distribution of original coverage data by single age and screening interval among countries with different pattern in older ages for the ever in lifetime coverage compared to other screening intervals.**

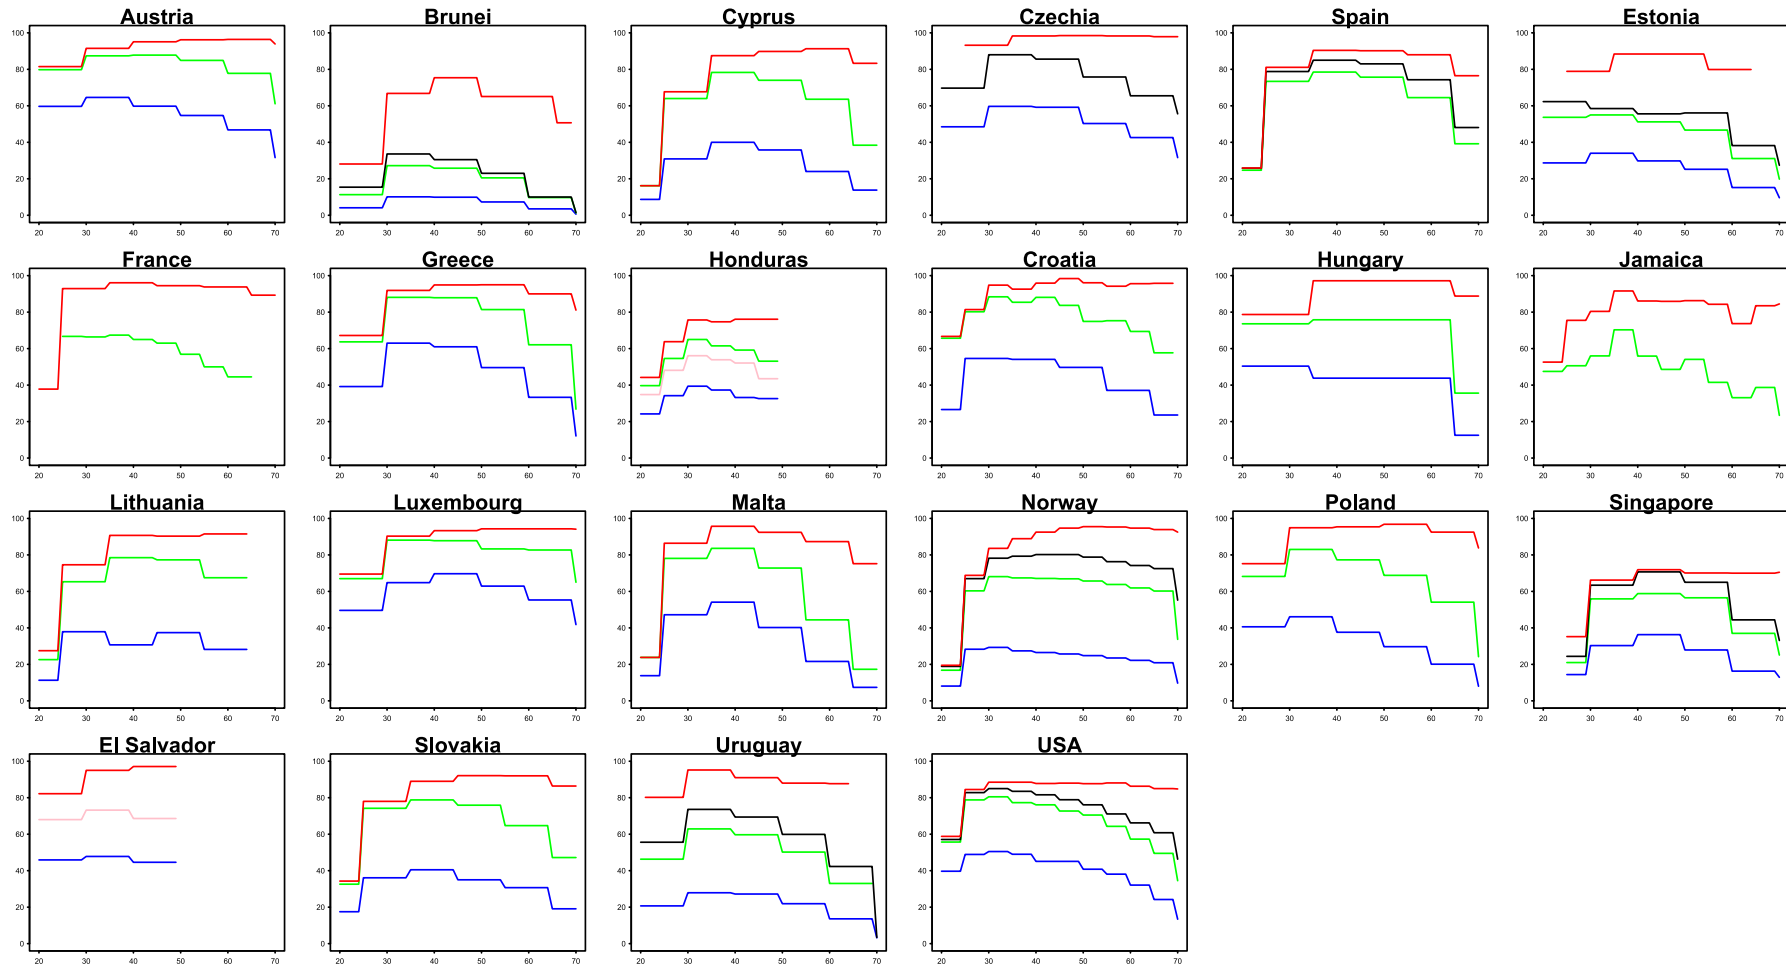

Blue line: previous year; Pink line: previous two years; Green line: previous three years; Black line: previous five years; Red line: ever in lifetime.

**Figure S1.3. Distribution of original coverage data by single age and screening interval among countries with different pattern for the ever in lifetime coverage compared to other screening intervals.**

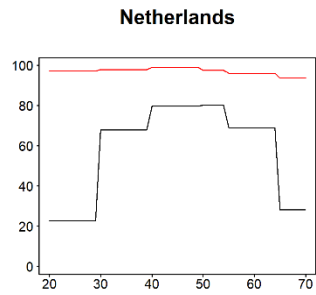

Black line: previous five years; Red line: ever in lifetime.

## Figures S2.1 and S2.2. Density plots of missing data using Predictive Mean Matching.

We plotted below the density plots of original and imputed data using the Predictive Mean Matching method for each screening period (Figures S2.1 and S2.2). In blue we drew the original data and in red we drew the 40 imputed data. As displayed in the plots, PMM imputes lower coverages to the original data for all screening intervals except for the ever in lifetime coverage, suggesting that screening data was missing in countries with small coverages.

**Figure S2.1. Density plots of original and imputed data including in the model the 164 countries with at least one datapoint (Step 3a of the imputation algorithm).**

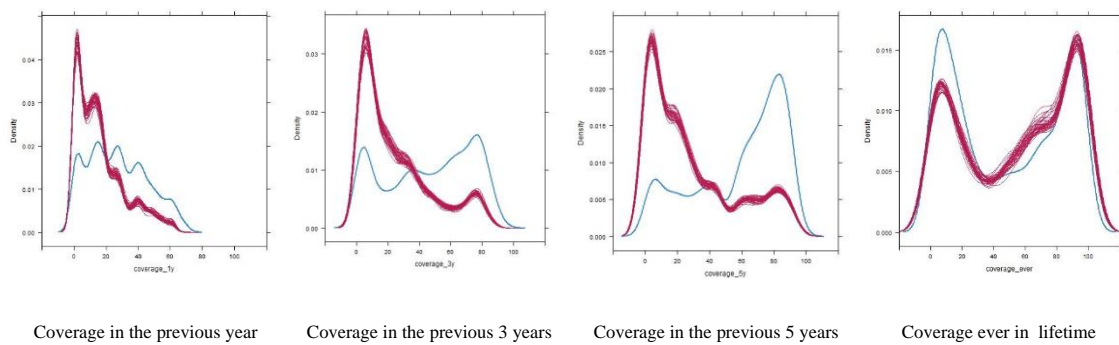

Blue line: original data; Red line: imputed data.

**Figure S2.2. Density plots of original and imputed data including in the model all countries (Step 4 of the imputation algorithm).**

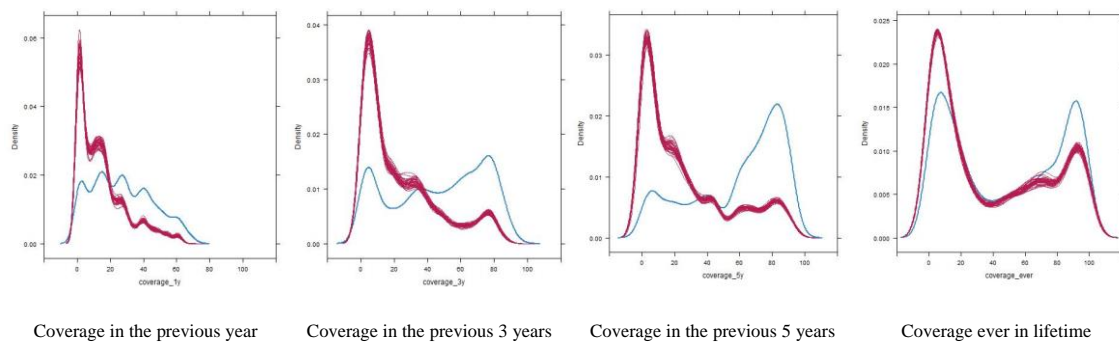

Blue line: original data; Red line: imputed data.

### Figure S3. Imputation method used to estimate missing data by age and country

The figure below presents the imputation method used to estimate missing data for the previous year, previous three years, previous five years and ever in lifetime among women aged 20-70 years by country. Green squares represent the original coverage data (Step 0), and the rest of estimations are coming from the multi-step imputation algorithm (Steps 1 to 4) (Table S4).

**Legend:**

|                                                       |                                                                                   |                                                                                |
|-------------------------------------------------------|-----------------------------------------------------------------------------------|--------------------------------------------------------------------------------|
| <b>Step 0</b>                                         |  | Original data coverage                                                         |
| <b>Countries with at least one coverage datapoint</b> |                                                                                   |                                                                                |
| <b>Step 1</b>                                         |  | Modification of aggregated/out of recommendations data                         |
| <b>Step 2</b>                                         |  | Linear interpolation                                                           |
| <b>Step 3a</b>                                        |  | Predictive Mean Matching method to records with at least one datapoint         |
| <b>Step 3b</b>                                        |  | Last observation carried forward / next observation carried backward technique |
| <b>Step 3c</b>                                        |  | Ponderation rate                                                               |
| <b>Countries without coverage datapoints</b>          |                                                                                   |                                                                                |
| <b>Step 4</b>                                         |  | Predictive Mean Matching method to all records of the database                 |

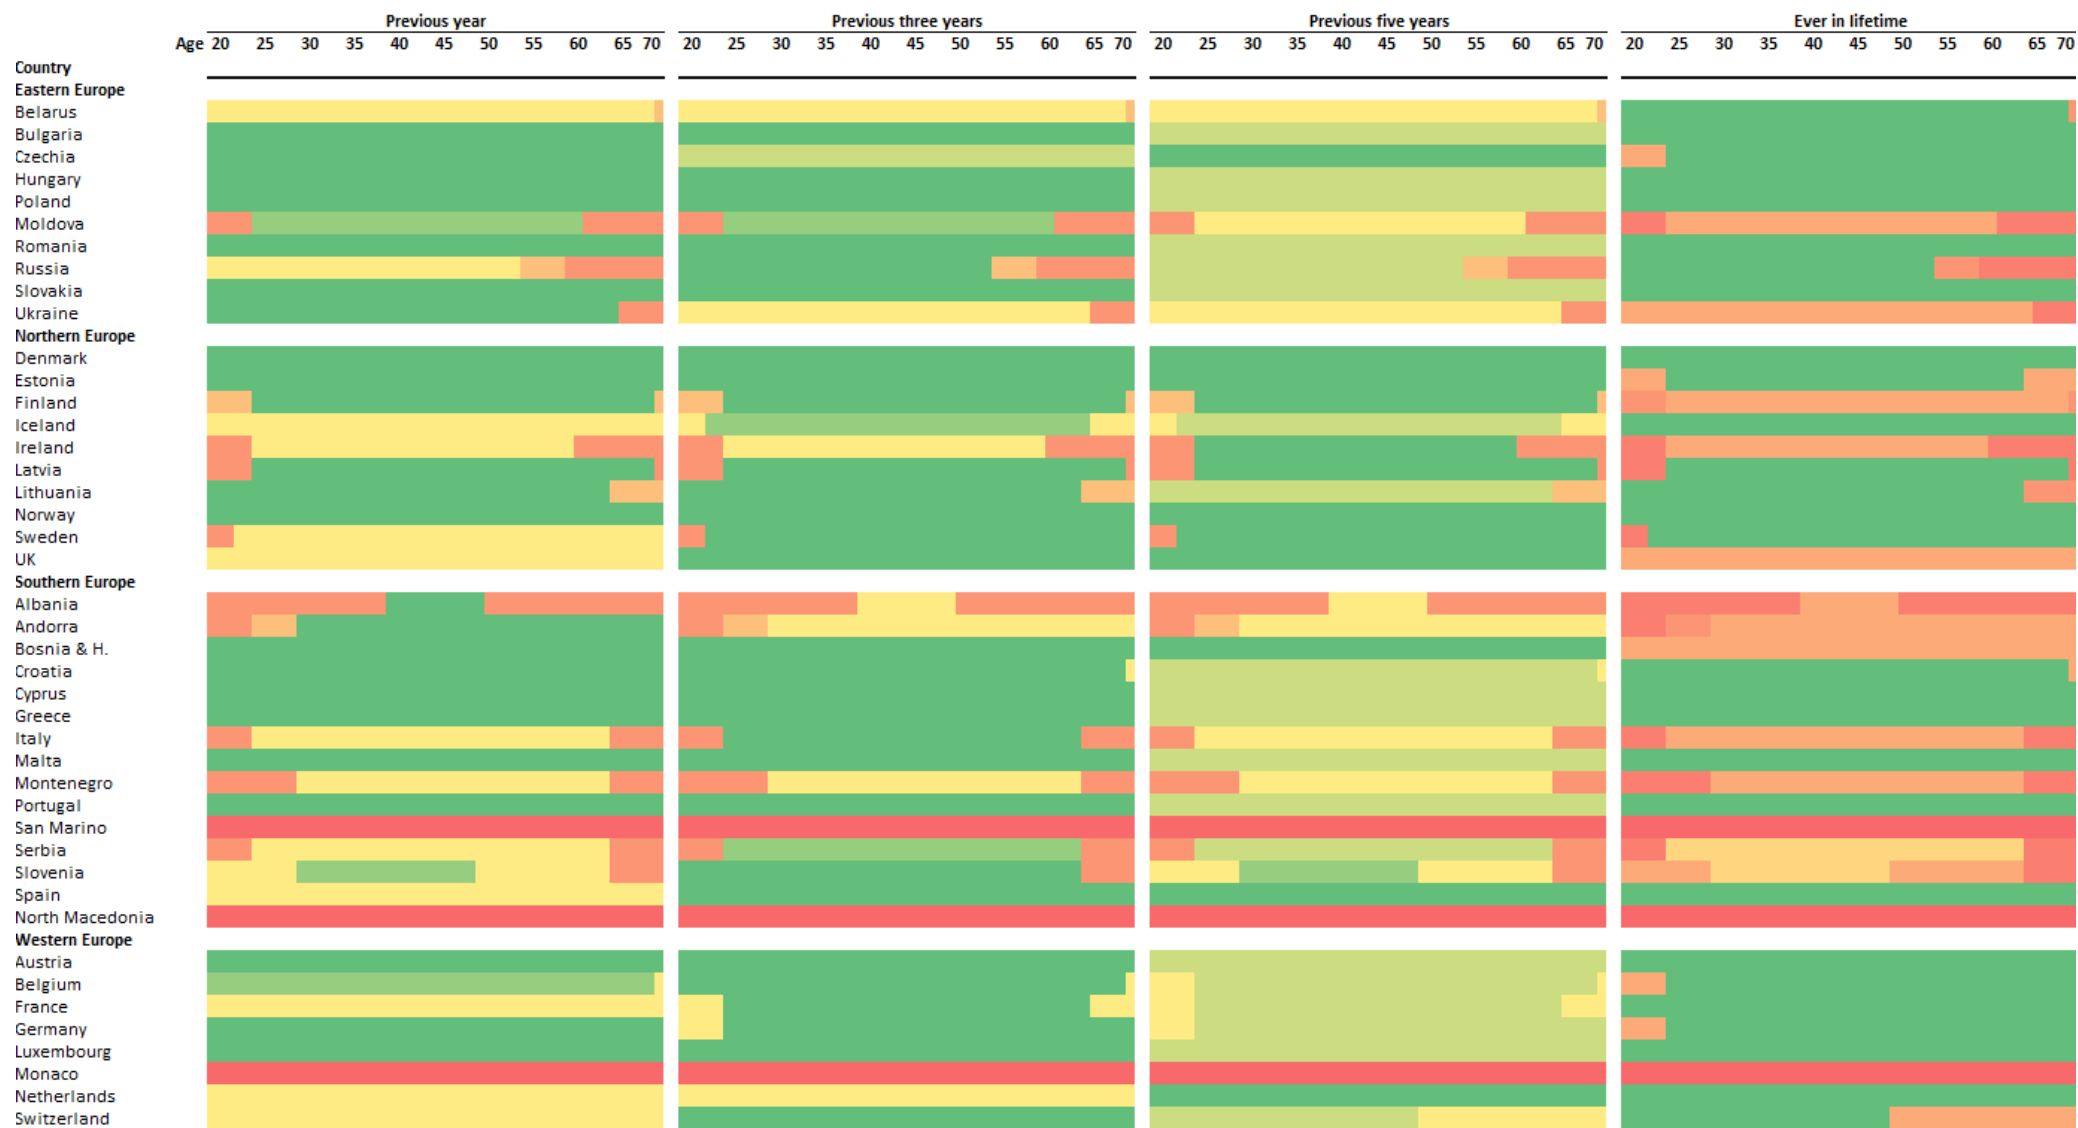

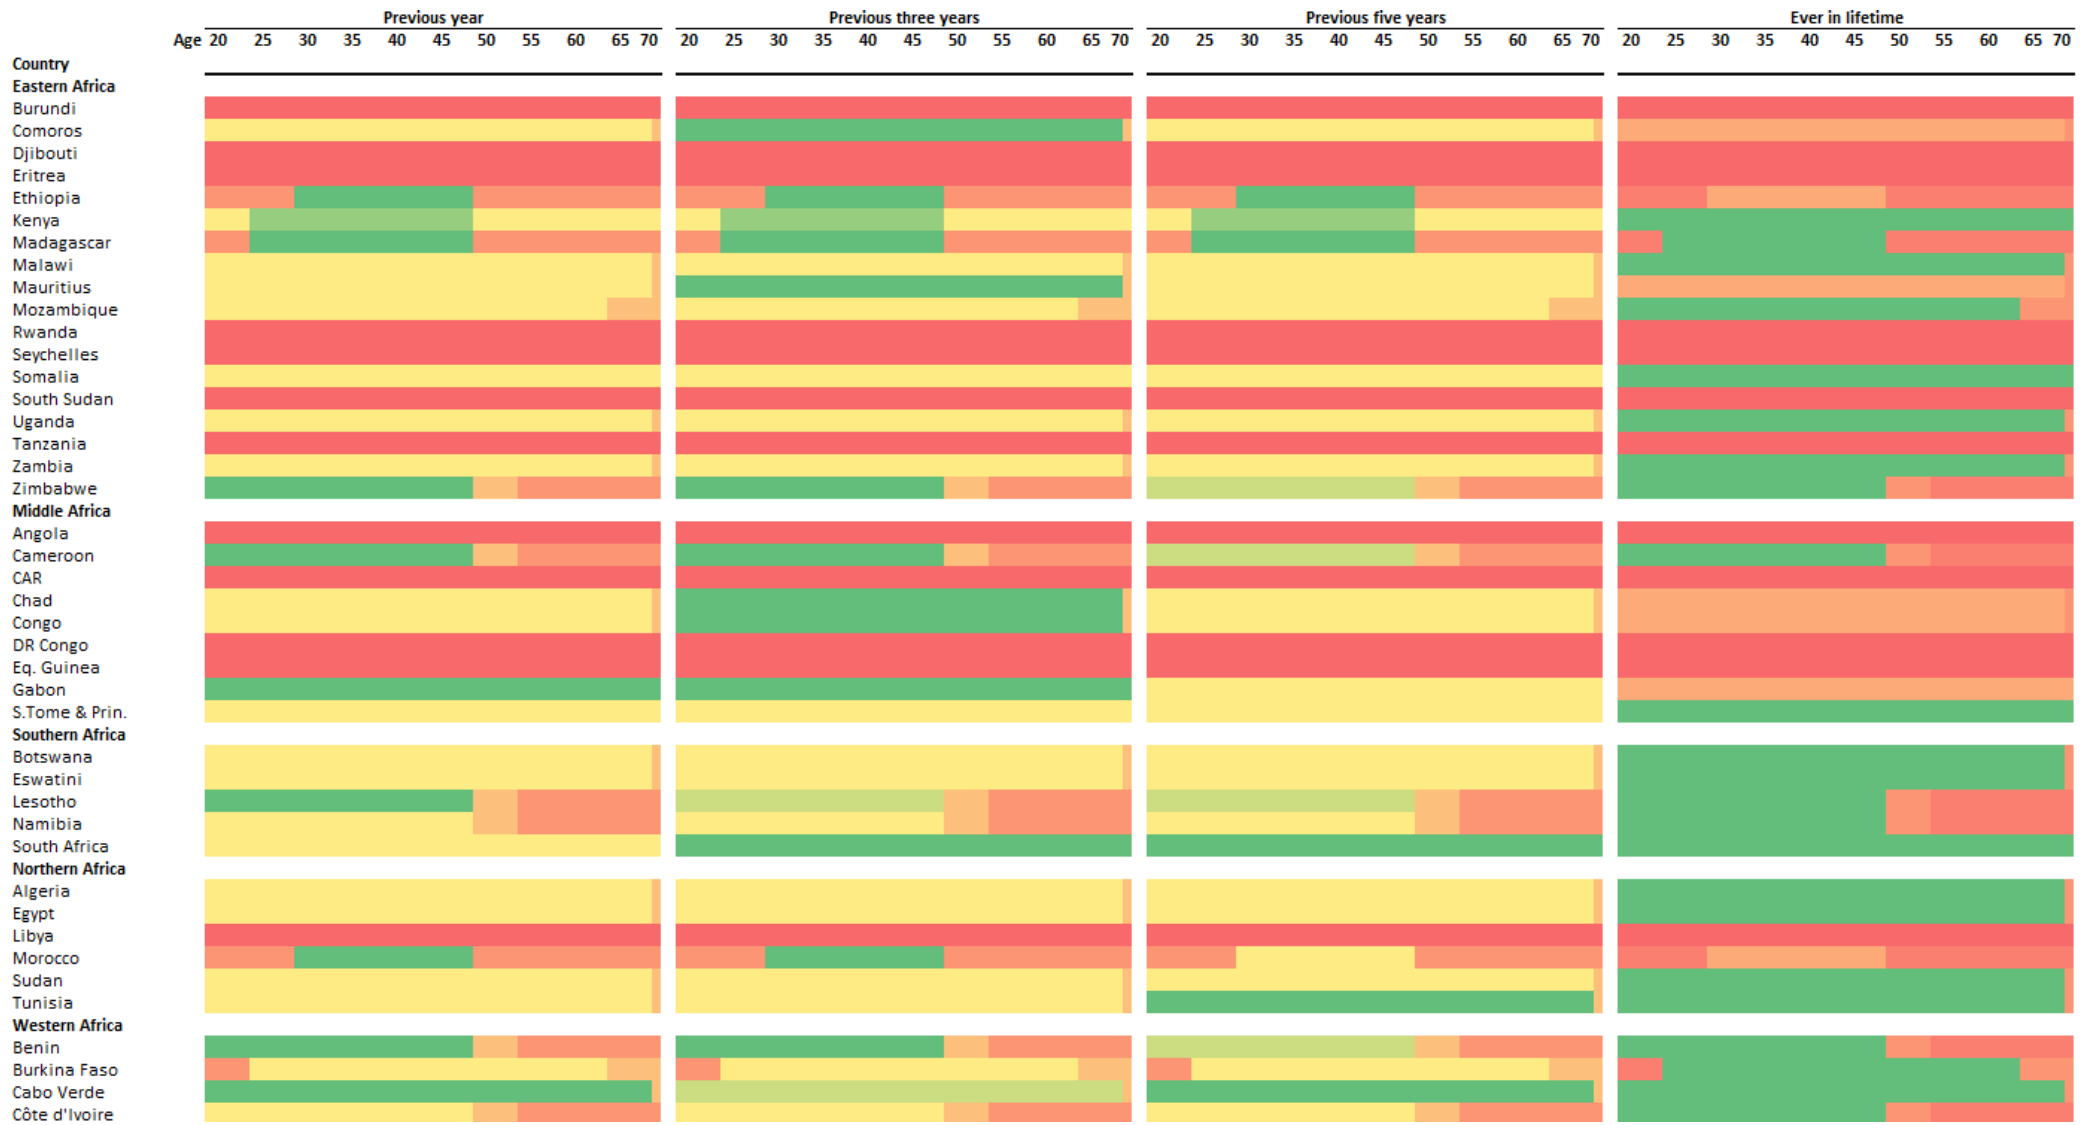



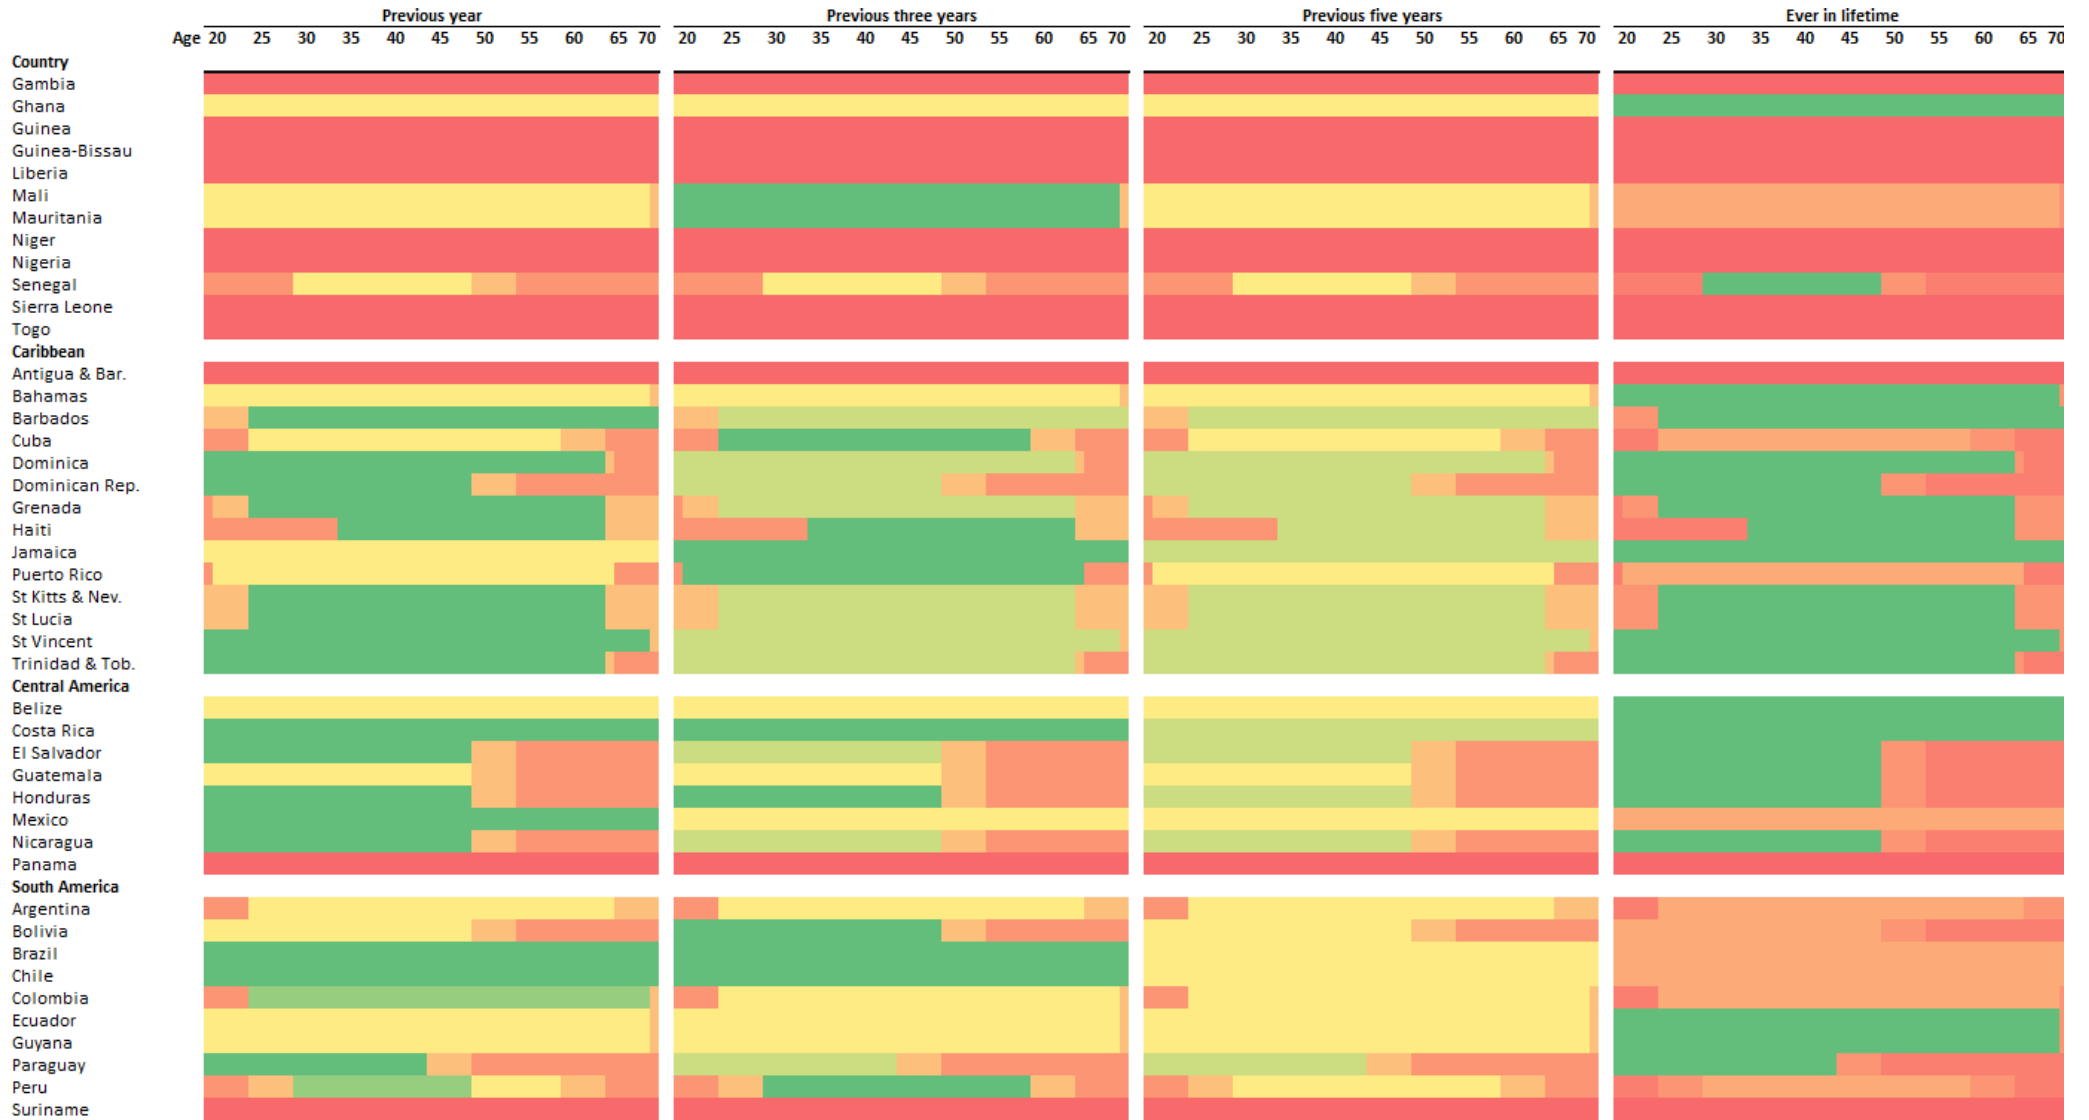

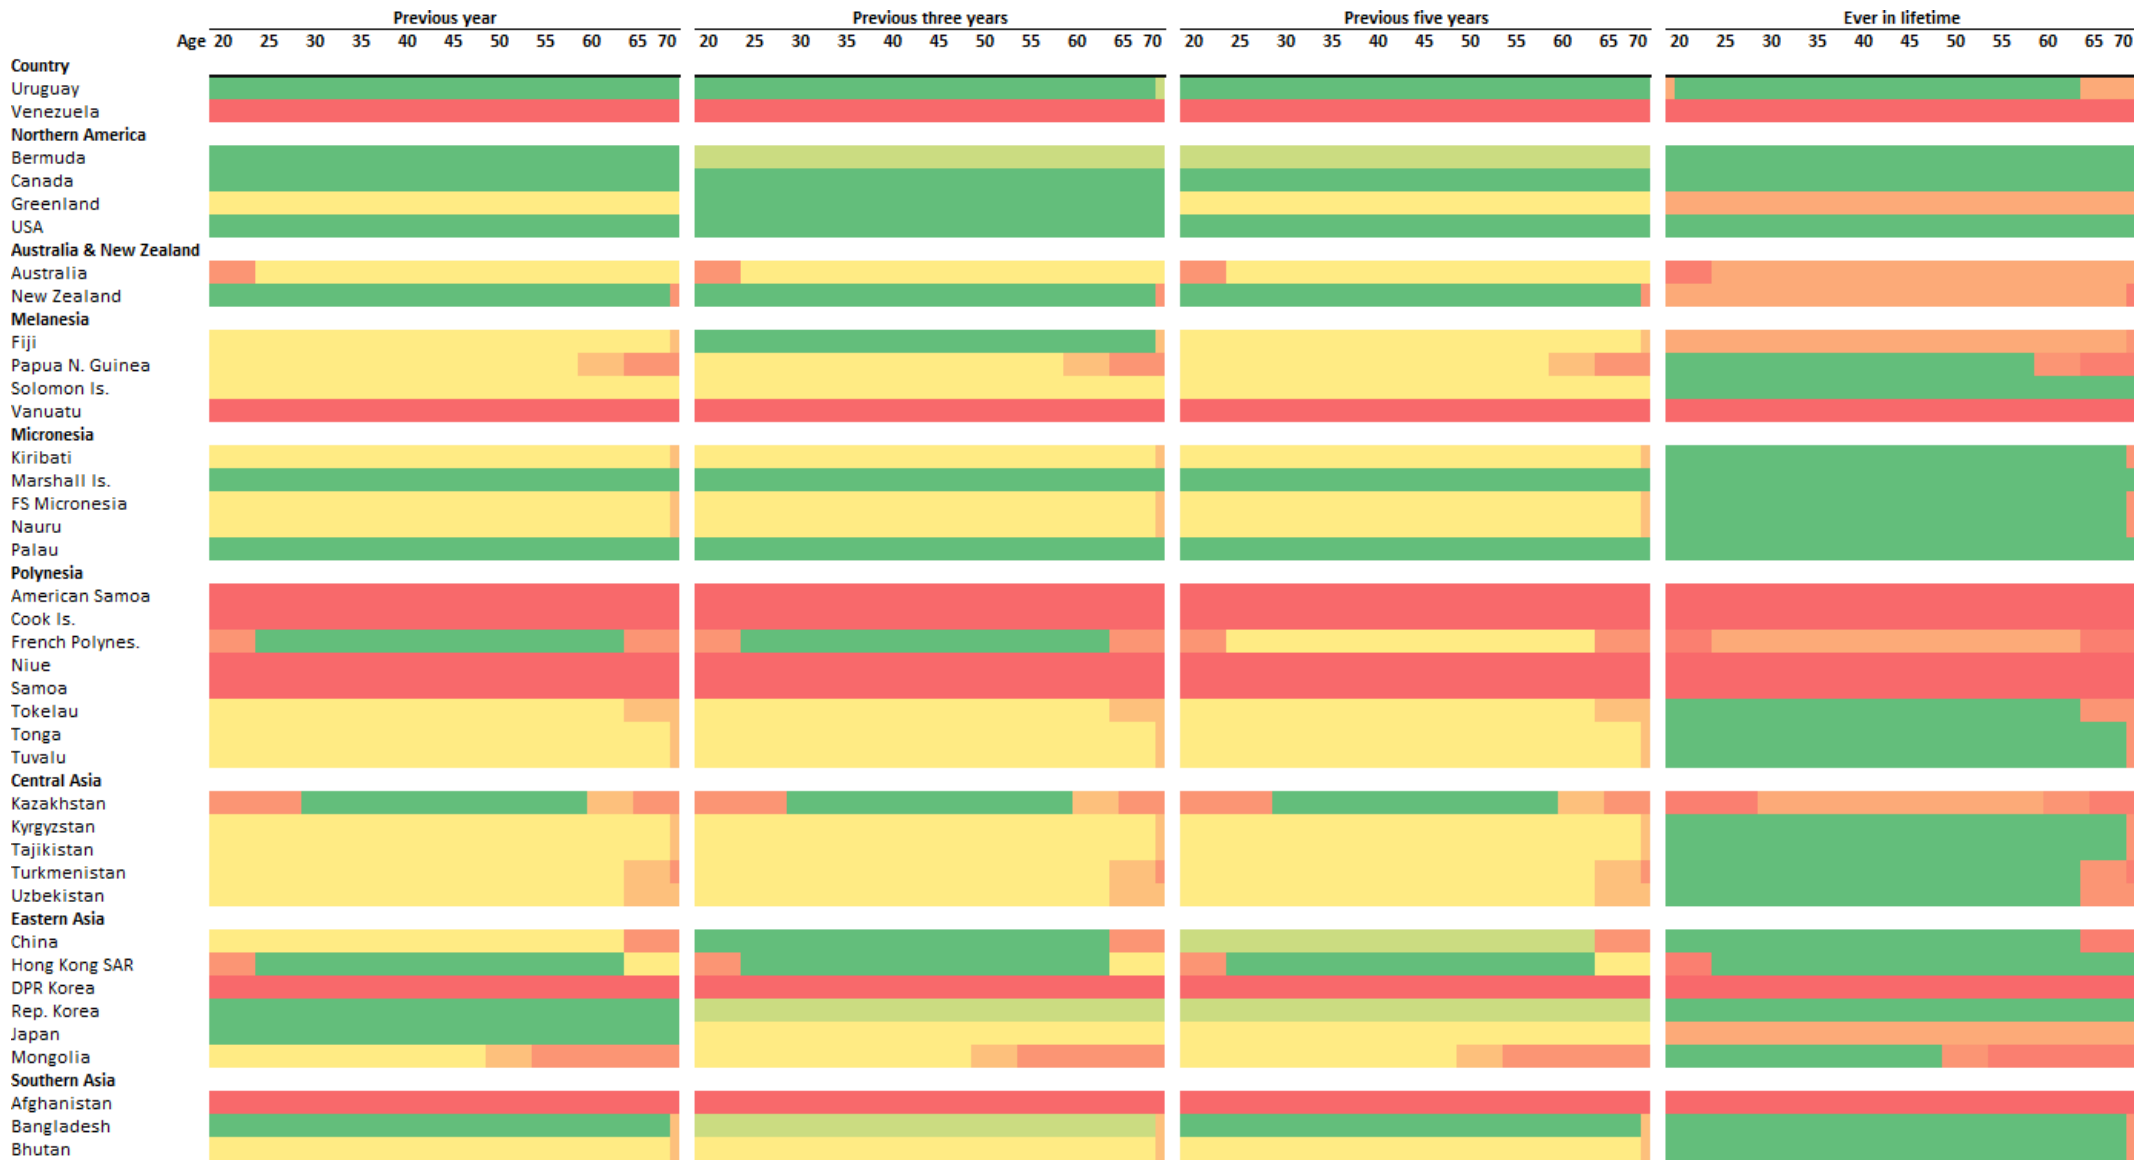

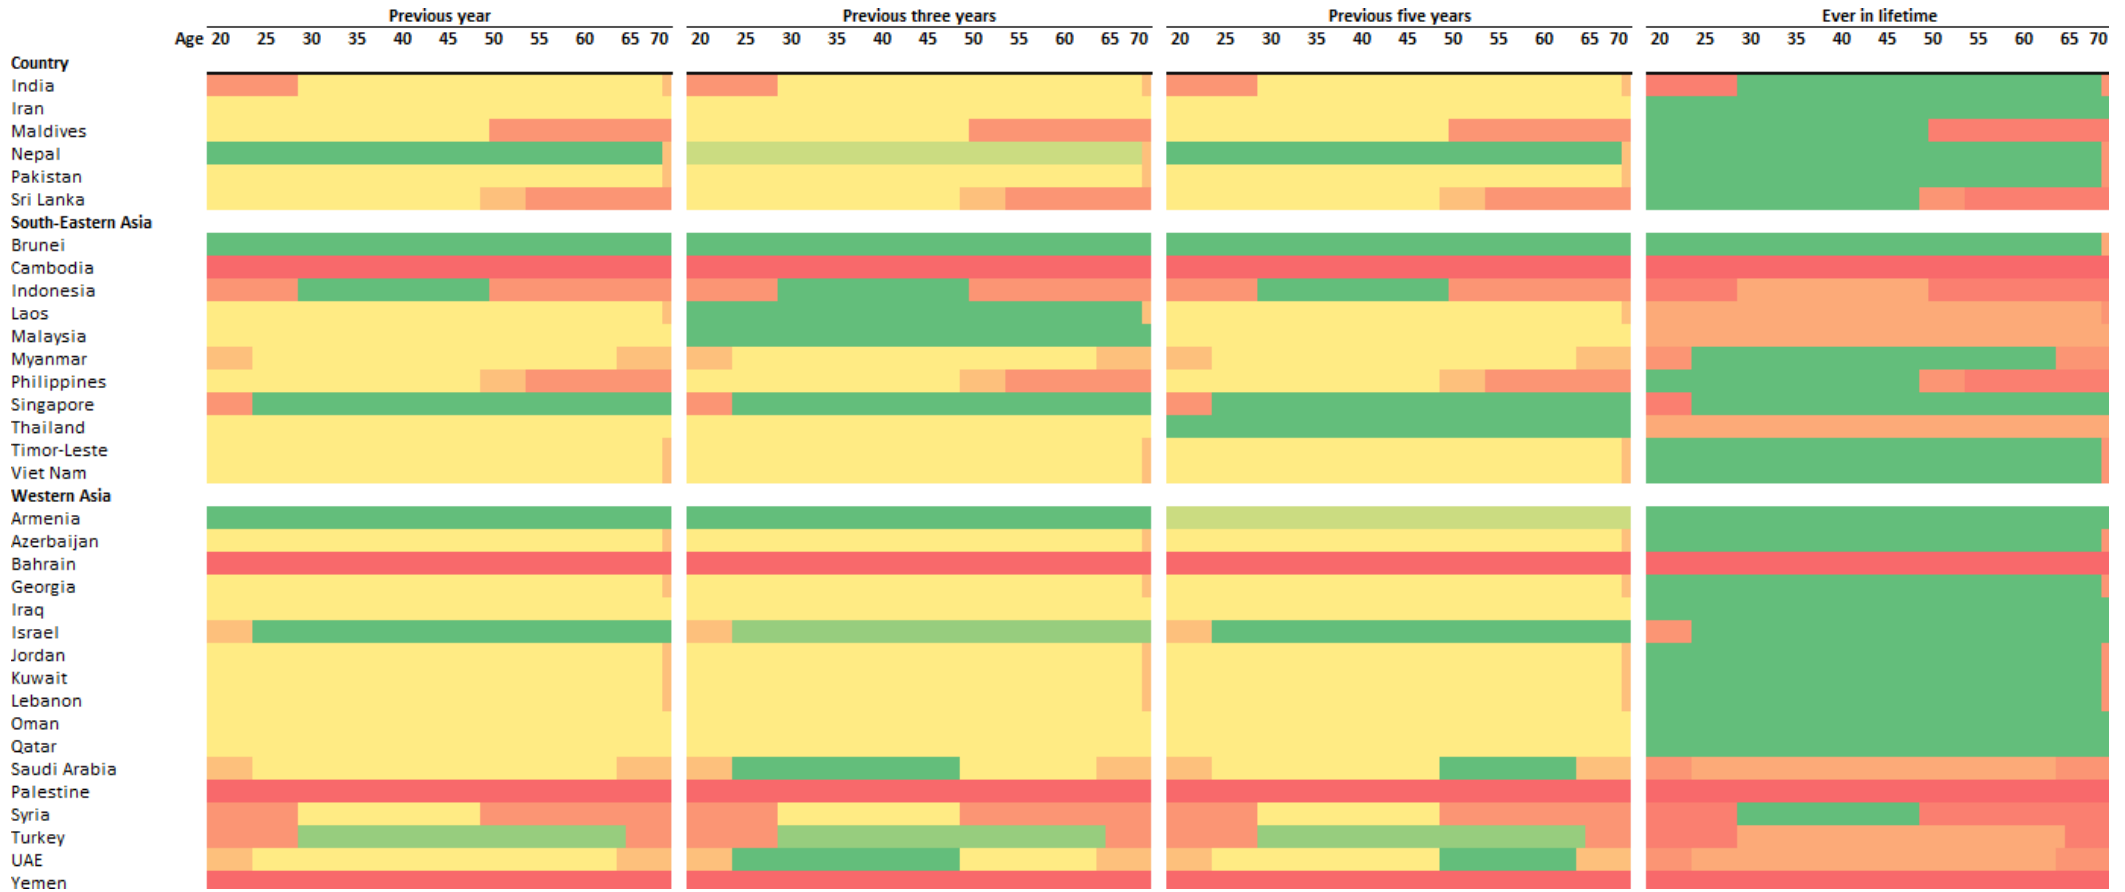

**Figure S4. Correlation between imputed data and original data for 50 simulations.**

One of the strategies to validate the imputation algorithm was to run 50 simulations in which in each simulation we selected a random sample of 200 age groups with original coverage data to be treated as missing, and we imputed the data following the stepwise algorithm (Table S4). The resulting plot of all simulations combined shows a correlation coefficient of 88.8%. 6 917 out of 66 672 single age datapoints imputed (10.4%) had distances equal or greater than 15% (coloured in red in the plot).

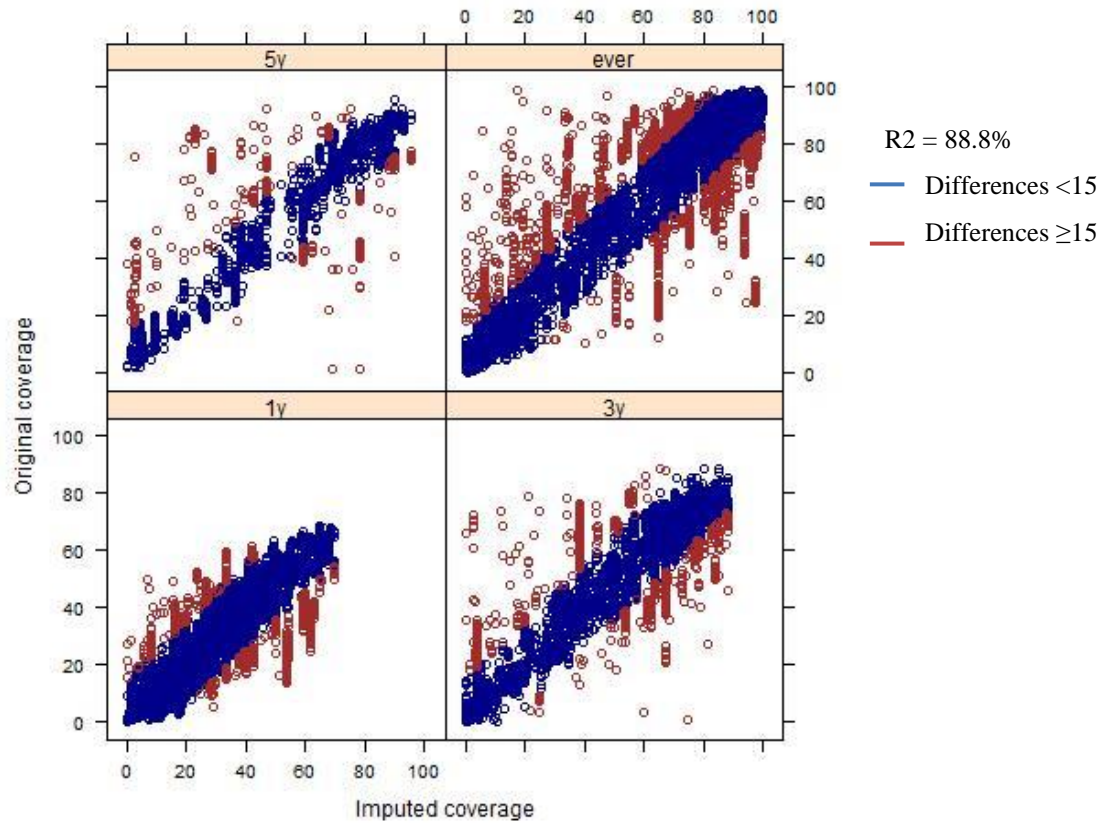

**Figure S5. Differences between imputed data and original data, excluding one by one each country.**

Another strategy to validate the imputation algorithm was to select one by one each country with original coverage data (164 countries), treat the country as missing and impute the data following the stepwise algorithm. The boxplot shows screening estimates worldwide and by income level, for each screening interval. Global estimates worldwide show differences between 1-4% and of maximum 11% by income level and region. The higher differences came from countries with larger populations, such as China, India, Brazil, or USA.

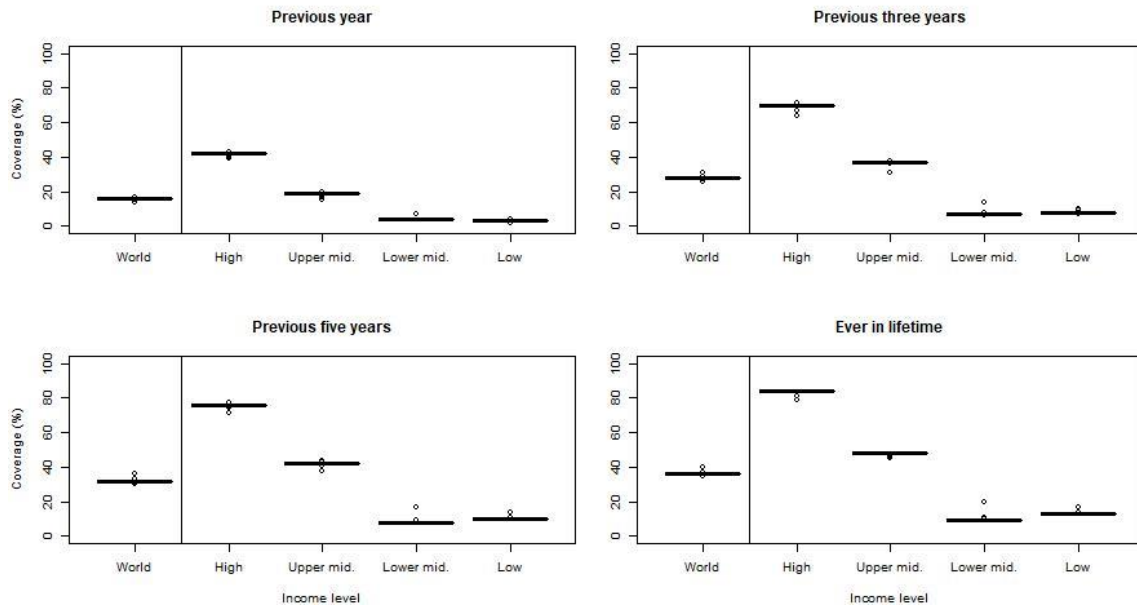

**Table S1. Data sources for screening coverage, by country.**

| Area                            | Coverage              | Setting | Year      | Source type | Source name                                                              | Reference                                                                                                                                                                              |
|---------------------------------|-----------------------|---------|-----------|-------------|--------------------------------------------------------------------------|----------------------------------------------------------------------------------------------------------------------------------------------------------------------------------------|
| <b>EUROPE</b>                   |                       |         |           |             |                                                                          |                                                                                                                                                                                        |
| <b>Albania</b>                  | National              | All     | 2019      | Admin       | Albania National Cervical Cancer Program Evaluation Report 2019          | Personal communication (*)                                                                                                                                                             |
| <b>Andorra</b>                  | National              | All     | 2011      | Survey      | National Health Survey (NHS) - Andorra                                   | Social Observatory Andorra ( <a href="https://observatorisocial.ad">https://observatorisocial.ad</a> )                                                                                 |
| <b>Austria</b>                  | National              | All     | 2019      | Survey      | Austrian Health Interview Survey (ATHIS)                                 | Statistic Austria ( <a href="http://www.statistik.at/web_de/statistiken/index.html">http://www.statistik.at/web_de/statistiken/index.html</a> )                                        |
| <b>Belarus</b>                  | National              | All     | 2016-2017 | Survey      | STEPS survey - Belarus                                                   | WHO NCD Microdata repository ( <a href="https://extranet.who.int/ncdsmicrodata/index.php/home">https://extranet.who.int/ncdsmicrodata/index.php/home</a> )                             |
| <b>Belgium</b>                  | National              | All     | 2018      | Survey      | Health Interview Survey - Belgium                                        | Health Interview Survey ( <a href="https://his.wiv-isp.be/SitePages/Home.aspx">https://his.wiv-isp.be/SitePages/Home.aspx</a> )                                                        |
| <b>Belgium</b>                  | National              | All     | 2013      | Survey      | European Health Interview Survey (EHIS) - Belgium                        | Eurostat ( <a href="https://ec.europa.eu/eurostat/web/main/home">https://ec.europa.eu/eurostat/web/main/home</a> )                                                                     |
| <b>Bosnia &amp; Herzegovina</b> | Subnat - Tuzla Kanton | All     | 2019      | Admin       | Tuzla Kanton registry                                                    | Personal communication (*)                                                                                                                                                             |
| <b>Bulgaria</b>                 | National              | All     | 2014      | Survey      | European Health Interview Survey (EHIS) - Bulgaria                       | Eurostat ( <a href="https://ec.europa.eu/eurostat/web/main/home">https://ec.europa.eu/eurostat/web/main/home</a> )                                                                     |
| <b>Croatia</b>                  | National              | All     | 2019      | Survey      | European Health Interview Survey (EHIS) - Croatia                        | Eurostat ( <a href="https://ec.europa.eu/eurostat/web/main/home">https://ec.europa.eu/eurostat/web/main/home</a> )                                                                     |
| <b>Cyprus</b>                   | National              | All     | 2014      | Survey      | European Health Interview Survey (EHIS) - Cyprus                         | Eurostat ( <a href="https://ec.europa.eu/eurostat/web/main/home">https://ec.europa.eu/eurostat/web/main/home</a> )                                                                     |
| <b>Czechia</b>                  | National              | All     | 2019      | Admin       | National Registry of Reimbursed Health Services (NRRHS) - Czech Republic | WHO country consultation (*)                                                                                                                                                           |
| <b>Czechia</b>                  | National              | All     | 2014      | Survey      | European Health Interview Survey (EHIS) - Czech Republic                 | Eurostat ( <a href="https://ec.europa.eu/eurostat/web/main/home">https://ec.europa.eu/eurostat/web/main/home</a> )                                                                     |
| <b>Denmark</b>                  | National              | All     | 2019      | Admin       | Danish Quality Assurance database for cervical cancer screening          | Danish Quality Assurance database for cervical cancer screening - DKLS ( <a href="https://www.sundhed.dk/">https://www.sundhed.dk/</a> )                                               |
| <b>Estonia</b>                  | National              | All     | 2019      | Admin       | Health Insurance Fund - Estonia                                          | WHO country consultation (*)                                                                                                                                                           |
| <b>Estonia</b>                  | National              | All     | 2016      | Survey      | Health Behavior among Estonian Adult Population                          | National Institute fo Health Development ( <a href="https://www.tai.ee/et/">https://www.tai.ee/et/</a> )                                                                               |
| <b>Finland</b>                  | National              | All     | 2018      | Admin       | Finish Cancer Registry                                                   | Finish Cancer Registry ( <a href="https://cancerregistry.fi/">https://cancerregistry.fi/</a> )                                                                                         |
| <b>France</b>                   | National              | All     | 2018      | Admin       | GEO Donnees en Santé Publique (GEODES) -France                           | Pankakoski M (2020) Preventive Medicine<br>GEO Donnees en Santé Publique ( <a href="https://geodes.santepubliquefrance.fr/#c=home">https://geodes.santepubliquefrance.fr/#c=home</a> ) |
| <b>France</b>                   | National              | All     | 2014      | Survey      | European Health Interview Survey (EHIS) - France                         | Eurostat ( <a href="https://ec.europa.eu/eurostat/web/main/home">https://ec.europa.eu/eurostat/web/main/home</a> )                                                                     |
| <b>Germany</b>                  | National              | All     | 2014-2015 | Survey      | Germany Health Update (GEDA/EHIS)                                        | Eurostat ( <a href="https://ec.europa.eu/eurostat/web/main/home">https://ec.europa.eu/eurostat/web/main/home</a> )<br>Starker A, et al. (2018) Bundesgesundheitsblatt                  |

|                            |               |     |           |        |                                                                  | Gesundheitsforschung Gesundheitsschutz                                                                                                                                       |
|----------------------------|---------------|-----|-----------|--------|------------------------------------------------------------------|------------------------------------------------------------------------------------------------------------------------------------------------------------------------------|
| <b>Greece</b>              | National      | All | 2019      | Survey | National Health Interview Survey (EHIS) - Greece                 | WHO country consultation (*)                                                                                                                                                 |
| <b>Hungary</b>             | National      | All | 2019      | Survey | European Health Interview Survey (EHIS) - Hungary                | Hungarian Central Statistical Office ( <a href="https://www.ksh.hu/">https://www.ksh.hu/</a> )                                                                               |
| <b>Ireland</b>             | National      | All | 2017      | Admin  | CervicalCheck - Ireland                                          | National Screening Service ( <a href="https://www.screeningservice.ie/">https://www.screeningservice.ie/</a> )                                                               |
| <b>Iceland</b>             | National      | All | 2019      | Admin  | Cancer Detection Clinic of the Icelandic Cancer Society          | Eurostat ( <a href="https://ec.europa.eu/eurostat/web/main/home">https://ec.europa.eu/eurostat/web/main/home</a> )                                                           |
| <b>Iceland</b>             | National      | All | 2014      | Survey | European Health Interview Survey (EHIS) - Iceland                | Eurostat ( <a href="https://ec.europa.eu/eurostat/web/main/home">https://ec.europa.eu/eurostat/web/main/home</a> )                                                           |
| <b>Italy</b>               | National      | All | 2019      | Survey | National telephone-interview surveillance system - PASSI - Italy | Epicentro ( <a href="https://www.epicentro.iss.it/passi/dati/ScreeningCervicale">https://www.epicentro.iss.it/passi/dati/ScreeningCervicale</a> )                            |
| <b>Latvia</b>              | National      | All | 2019      | Admin  | National Health Service - Republic of Latvia                     | WHO country consultation (*)                                                                                                                                                 |
| <b>Lithuania</b>           | National      | All | 2014      | Survey | Health Behaviour among Lithuanian Adult Population               | Institute of Hygiene ( <a href="https://hi.lt/">https://hi.lt/</a> )                                                                                                         |
| <b>Luxembourg</b>          | National      | All | 2019      | Survey | European Health Interview Survey (EHIS) - Luxembourg             | WHO country consultation (*)                                                                                                                                                 |
| <b>North Macedonia</b>     | Not available |     |           |        |                                                                  |                                                                                                                                                                              |
| <b>Malta</b>               | National      | All | 2014-2015 | Survey | European Health Interview Survey (EHIS) - Malta                  | Ministry for Health ( <a href="https://deputyprimeminister.gov.mt/en/Pages/Contact-Us.aspx">https://deputyprimeminister.gov.mt/en/Pages/Contact-Us.aspx</a> )                |
| <b>Monaco</b>              | Not available |     |           |        |                                                                  |                                                                                                                                                                              |
| <b>Montenegro</b>          | National      | All | 2019      | Admin  | Official administrative data                                     | Personal communication (*)                                                                                                                                                   |
| <b>Netherlands</b>         | National      | All | 2019      | Survey | National Health survey (NHS) - Netherlands                       | Statline ( <a href="https://opendata.cbs.nl/statline/#/CBS/nl/">https://opendata.cbs.nl/statline/#/CBS/nl/</a> )                                                             |
| <b>Norway</b>              | National      | All | 2019      | Admin  | Cervical Screening Program registry - Norway                     | Cancer Registry of Norway ( <a href="https://www.kreftregisteret.no/">https://www.kreftregisteret.no/</a> )                                                                  |
| <b>Poland</b>              | National      | All | 2014      | Survey | The state of health of the Polish population                     | Statistics Poland ( <a href="https://stat.gov.pl/">https://stat.gov.pl/</a> )                                                                                                |
| <b>Portugal</b>            | National      | All | 2014      | survey | National Health Survey (EHIS) - Portugal                         | National Institute of Statistics ( <a href="https://www.ine.pt/xportal/xmain?xpid=INE&amp;xpgid=ine_main">https://www.ine.pt/xportal/xmain?xpid=INE&amp;xpgid=ine_main</a> ) |
| <b>Republic of Moldova</b> | National      | All | 2019      | Admin  | Official administrative data                                     | WHO country consultation (*)                                                                                                                                                 |
| <b>Romania</b>             | National      | All | 2014      | Survey | European Health Interview Survey (EHIS) - Romania                | Eurostat ( <a href="https://ec.europa.eu/eurostat/web/main/home">https://ec.europa.eu/eurostat/web/main/home</a> )                                                           |
| <b>Russian Federation</b>  | National      | All | 2012      | Survey | Russia Longitudinal Monitoring Survey                            | Reynolds Z, et al. (2014) Chapel Hill, NC: MEASURE Evaluation                                                                                                                |
| <b>San Marino</b>          | Not available |     |           |        |                                                                  |                                                                                                                                                                              |
| <b>Serbia</b>              | National      | All | 2019      | Survey | European Health Interview Survey (EHIS) - Serbia                 | Statistical Office of the Republic of Serbia ( <a href="https://www.stat.gov.rs/">https://www.stat.gov.rs/</a> )                                                             |
| <b>Serbia</b>              | National      | All | 2016      | Admin  | Official administrative data                                     | Personal communication (*)                                                                                                                                                   |
| <b>Slovakia</b>            | National      | All | 2014      | Survey | European Health Interview Survey (EHIS) - Slovakia               | Eurostat ( <a href="https://ec.europa.eu/eurostat/web/main/home">https://ec.europa.eu/eurostat/web/main/home</a> )                                                           |
| <b>Slovenia</b>            | National      | All | 2019      | Admin  | ZORA program - Slovenia                                          | Cervical Cancer Screening Program and Registry ZORA ( <a href="https://zora.onko-i.si/">https://zora.onko-i.si/</a> )                                                        |

|                                 |                           |     |           |        |                                                                                  |                                                                                                                                                            |
|---------------------------------|---------------------------|-----|-----------|--------|----------------------------------------------------------------------------------|------------------------------------------------------------------------------------------------------------------------------------------------------------|
| <b>Spain</b>                    | National                  | All | 2017      | Survey | National Health Survey (NHS) - Spain                                             | Ministry of Health ( <a href="https://www.mscbs.gob.es/home.htm">https://www.mscbs.gob.es/home.htm</a> )                                                   |
| <b>Sweden</b>                   | National                  | All | 2018      | Admin  | National Quality Register for Cervical Cancer Prevention (NKCx) - Sweden         | Swedish National Cervical Screening Registry ( <a href="https://nkcx.se/index.htm">https://nkcx.se/index.htm</a> )                                         |
| <b>Switzerland</b>              | National                  | All | 2014      | Survey | National cross-sectional questionnaire survey - Switzerland                      | Wymann MN, et al. (2018) Int J Public Health                                                                                                               |
| <b>Switzerland</b>              | National                  | All | 2012      | Survey | Swiss Health Interview Survey (SHIS)                                             | Burton-Jeangros C, et al. (2017) Eur J Public Health                                                                                                       |
| <b>Ukraine</b>                  | Subnat - Lviv region      | All | 2019      | Admin  | Official administrative data                                                     | Personal communication (*)                                                                                                                                 |
| <b>United Kingdom</b>           | Subnat - Wales            | All | 2018-2019 | Admin  | Public Health Wales                                                              | Public Health Wales ( <a href="https://phw.nhs.wales/">https://phw.nhs.wales/</a> )                                                                        |
| <b>United Kingdom</b>           | Subnat - England          | All | 2019      | Admin  | NHS Digital - England                                                            | NHS Digital ( <a href="https://digital.nhs.uk/">https://digital.nhs.uk/</a> )                                                                              |
| <b>United Kingdom</b>           | Subnat - Scotland         | All | 2019      | Admin  | NHS National Services Scotland                                                   | NHS National Services Scotland ( <a href="https://nhsns.org/">https://nhsns.org/</a> )                                                                     |
| <b>United Kingdom</b>           | Subnat - Northern Ireland | All | 2019      | Admin  | NSC Public Health Agency - Northern Ireland                                      | NSC Public Health Agency ( <a href="https://www.publichealth.hscni.net/">https://www.publichealth.hscni.net/</a> )                                         |
| <b>AFRICA</b>                   |                           |     |           |        |                                                                                  |                                                                                                                                                            |
| <b>Algeria</b>                  | National                  | All | 2016-2017 | Survey | STEPS survey - Algeria                                                           | WHO NCD Microdata repository ( <a href="https://extranet.who.int/ncdsmicrodata/index.php/home">https://extranet.who.int/ncdsmicrodata/index.php/home</a> ) |
| <b>Angola</b>                   | Not available             |     |           |        |                                                                                  |                                                                                                                                                            |
| <b>Benin</b>                    | National                  | All | 2017-2018 | Survey | Demographic and Health Survey (DHS) - Benin                                      | DHS Program ( <a href="https://dhsprogram.com/">https://dhsprogram.com/</a> )                                                                              |
| <b>Botswana</b>                 | National                  | All | 2014      | Survey | STEPS survey - Botswana                                                          | WHO NCD Microdata repository ( <a href="https://extranet.who.int/ncdsmicrodata/index.php/home">https://extranet.who.int/ncdsmicrodata/index.php/home</a> ) |
| <b>Burkina Faso</b>             | National                  | All | 2013      | Survey | STEPS survey - Burkina Fasso                                                     | WHO NCD Microdata repository ( <a href="https://extranet.who.int/ncdsmicrodata/index.php/home">https://extranet.who.int/ncdsmicrodata/index.php/home</a> ) |
| <b>Burundi</b>                  | Not available             |     |           |        |                                                                                  |                                                                                                                                                            |
| <b>Cameroon</b>                 | National                  | All | 2018      | Survey | Demographic Health Survey (DHS) - Cameroon                                       | DHS Program ( <a href="https://dhsprogram.com/">https://dhsprogram.com/</a> )                                                                              |
| <b>Cape Verde</b>               | National                  | All | 2019      | Survey | STEPS survey - Cape Verde                                                        | WHO NCD Microdata repository ( <a href="https://extranet.who.int/ncdsmicrodata/index.php/home">https://extranet.who.int/ncdsmicrodata/index.php/home</a> ) |
| <b>Central African Republic</b> | Not available             |     |           |        |                                                                                  |                                                                                                                                                            |
| <b>Chad</b>                     | National                  | All | 2003      | Survey | World Health Survey (WHS) - Chad                                                 | WHO World Health Survey ( <a href="https://www.who.int/healthinfo/survey/en/">https://www.who.int/healthinfo/survey/en/</a> )                              |
| <b>Comoros</b>                  | National                  | All | 2003      | Survey | World Health Survey (WHS) - Comoros                                              | WHO World Health Survey ( <a href="https://www.who.int/healthinfo/survey/en/">https://www.who.int/healthinfo/survey/en/</a> )                              |
| <b>Congo</b>                    | National                  | All | 2003      | Survey | World Health Survey (WHS) - Congo                                                | WHO World Health Survey ( <a href="https://www.who.int/healthinfo/survey/en/">https://www.who.int/healthinfo/survey/en/</a> )                              |
| <b>Cote d'Ivoire</b>            | National                  | All | 2011-2012 | Survey | Demographic Health Survey & Multiple Indicator Cluster (DHS-MIC) - Cote d'Ivoire | DHS Program ( <a href="https://dhsprogram.com/">https://dhsprogram.com/</a> )                                                                              |
| <b>Djibouti</b>                 | Not available             |     |           |        |                                                                                  |                                                                                                                                                            |
| <b>DR Congo</b>                 | Not available             |     |           |        |                                                                                  |                                                                                                                                                            |



|                                |               |     |           |        |                                                            |                                                                                                                                                               |
|--------------------------------|---------------|-----|-----------|--------|------------------------------------------------------------|---------------------------------------------------------------------------------------------------------------------------------------------------------------|
| <b>Egypt</b>                   | National      | All | 2017      | Survey | STEPS survey - Egypt                                       | WHO NCD Microdata repository<br>( <a href="https://extranet.who.int/ncdsmicrodata/index.php/home">https://extranet.who.int/ncdsmicrodata/index.php/home</a> ) |
| <b>Equatorial Guinea</b>       | Not available |     |           |        |                                                            |                                                                                                                                                               |
| <b>Eritrea</b>                 | Not available |     |           |        |                                                            |                                                                                                                                                               |
| <b>Eswatini</b>                | National      | All | 2014      | Survey | STEPS survey - Swaziland                                   | WHO NCD Microdata repository<br>( <a href="https://extranet.who.int/ncdsmicrodata/index.php/home">https://extranet.who.int/ncdsmicrodata/index.php/home</a> ) |
| <b>Ethiopia</b>                | National      | All | 2019      | Admin  | Ethiopia District Health information System                | WHO country consultation (*)                                                                                                                                  |
| <b>Gabon</b>                   | National      | All | 2019      | Admin  | Official administrative data                               | WHO country consultation (*)                                                                                                                                  |
| <b>Gambia</b>                  | Not available |     |           |        |                                                            |                                                                                                                                                               |
| <b>Ghana</b>                   | National      | All | 2014-2015 | Survey | WHO study on global AGEing and adult health (SAGE) - Ghana | Calys-Tagoe BNL, et al. (2020) BMC Womens Health                                                                                                              |
| <b>Guinea</b>                  | Not available |     |           |        |                                                            |                                                                                                                                                               |
| <b>Guinea-Bissau</b>           | Not available |     |           |        |                                                            |                                                                                                                                                               |
| <b>Kenya</b>                   | National      | All | 2019      | Admin  | Kenya Health Information System data                       | WHO country consultation (*)                                                                                                                                  |
| <b>Kenya</b>                   | National      | All | 2015      | Survey | STEPS survey - Kenya                                       | WHO NCD Microdata repository<br>( <a href="https://extranet.who.int/ncdsmicrodata/index.php/home">https://extranet.who.int/ncdsmicrodata/index.php/home</a> ) |
| <b>Lesotho</b>                 | National      | All | 2014      | Survey | Demographic Health Survey (DHS) - Lesotho                  | DHS Program ( <a href="https://dhsprogram.com/">https://dhsprogram.com/</a> )                                                                                 |
| <b>Liberia</b>                 | Not available |     |           |        |                                                            |                                                                                                                                                               |
| <b>Libya</b>                   | Not available |     |           |        |                                                            |                                                                                                                                                               |
| <b>Madagascar</b>              | National      | All | 2019      | Admin  | Madagascar Health Information System data                  | WHO country consultation (*)                                                                                                                                  |
| <b>Malawi</b>                  | National      | All | 2017      | Survey | STEPS survey - Malawi                                      | WHO NCD Microdata repository<br>( <a href="https://extranet.who.int/ncdsmicrodata/index.php/home">https://extranet.who.int/ncdsmicrodata/index.php/home</a> ) |
| <b>Mali</b>                    | National      | All | 2003      | Survey | World Health Survey (WHS) - Mali                           | WHO World Health Survey<br>( <a href="https://www.who.int/healthinfo/survey/en/">https://www.who.int/healthinfo/survey/en/</a> )                              |
| <b>Mauritania</b>              | National      | All | 2003      | Survey | World Health Survey (WHS) - Mauritania                     | WHO World Health Survey<br>( <a href="https://www.who.int/healthinfo/survey/en/">https://www.who.int/healthinfo/survey/en/</a> )                              |
| <b>Mauritius</b>               | National      | All | 2003      | Survey | World Health Survey (WHS) - Mauritius                      | WHO World Health Survey<br>( <a href="https://www.who.int/healthinfo/survey/en/">https://www.who.int/healthinfo/survey/en/</a> )                              |
| <b>Morocco</b>                 | National      | All | 2019      | Admin  | Screening registry Morocco                                 | WHO country consultation (*)                                                                                                                                  |
| <b>Mozambique</b>              | National      | All | 2014-2015 | Survey | STEPS survey - Mozambique                                  | WHO NCD Microdata repository<br>( <a href="https://extranet.who.int/ncdsmicrodata/index.php/home">https://extranet.who.int/ncdsmicrodata/index.php/home</a> ) |
| <b>Namibia</b>                 | National      | All | 2013      | Survey | Demographic and Health Survey (DHS) - Namibia              | DHS Program ( <a href="https://dhsprogram.com/">https://dhsprogram.com/</a> )                                                                                 |
| <b>Niger</b>                   | Not available |     |           |        |                                                            |                                                                                                                                                               |
| <b>Nigeria</b>                 | Not available |     |           |        |                                                            |                                                                                                                                                               |
| <b>Rwanda</b>                  | Not available |     |           |        |                                                            |                                                                                                                                                               |
| <b>Sao Tome &amp; Principe</b> | National      | All | 2019      | Survey | STEPS survey - Sao Tome & Principe                         | WHO NCD Microdata repository<br>( <a href="https://extranet.who.int/ncdsmicrodata/index.php/home">https://extranet.who.int/ncdsmicrodata/index.php/home</a> ) |
| <b>Senegal</b>                 | National      | All | 2015      | Survey | STEPS survey - Senegal                                     | WHO NCD Microdata repository                                                                                                                                  |

(<https://extranet.who.int/ncdsmicrodata/index.php/home>)

|                              |                     |       |           |        |                                                                |                                                                                                                                                               |  |
|------------------------------|---------------------|-------|-----------|--------|----------------------------------------------------------------|---------------------------------------------------------------------------------------------------------------------------------------------------------------|--|
| <b>Seychelles</b>            | Not available       |       |           |        |                                                                |                                                                                                                                                               |  |
| <b>Sierra Leone</b>          | Not available       |       |           |        |                                                                |                                                                                                                                                               |  |
| <b>Somalia</b>               | Subnat - Somaliland | All   | 2018-2019 | Survey | STEPS survey - Somalia                                         | WHO NCD Microdata repository<br>( <a href="https://extranet.who.int/ncdsmicrodata/index.php/home">https://extranet.who.int/ncdsmicrodata/index.php/home</a> ) |  |
| <b>South Africa</b>          | National            | All   | 2016      | Survey | Demographic and Health Survey (DHS) - South Africa             | DHS Program ( <a href="https://dhsprogram.com/">https://dhsprogram.com/</a> )                                                                                 |  |
| <b>South Sudan</b>           | Not available       |       |           |        |                                                                |                                                                                                                                                               |  |
| <b>Sudan</b>                 | Not available       |       |           |        |                                                                |                                                                                                                                                               |  |
| <b>Tanzania</b>              | Not available       |       |           |        |                                                                |                                                                                                                                                               |  |
| <b>Togo</b>                  | Not available       |       |           |        |                                                                |                                                                                                                                                               |  |
| <b>Tunisia</b>               | National            | All   | 2016      | Survey | Tunisian Health Examination Survey                             | Health Ministry ( <a href="http://www.santetunisie.rns.tn/fr/">http://www.santetunisie.rns.tn/fr/</a> )                                                       |  |
| <b>Uganda</b>                | National            | All   | 2014      | Survey | STEPS survey - Uganda                                          | WHO NCD Microdata repository<br>( <a href="https://extranet.who.int/ncdsmicrodata/index.php/home">https://extranet.who.int/ncdsmicrodata/index.php/home</a> ) |  |
| <b>Zambia</b>                | National            | All   | 2017      | Survey | STEPS survey - Zambia                                          | WHO NCD Microdata repository<br>( <a href="https://extranet.who.int/ncdsmicrodata/index.php/home">https://extranet.who.int/ncdsmicrodata/index.php/home</a> ) |  |
| <b>Zimbabwe</b>              | National            | All   | 2015      | Survey | Demographic and Health Survey (DHS) - Zimbabwe                 | DHS Program ( <a href="https://dhsprogram.com/">https://dhsprogram.com/</a> )                                                                                 |  |
| <b>AMERICA</b>               |                     |       |           |        |                                                                |                                                                                                                                                               |  |
| <b>Antigua &amp; Barbuda</b> | Not available       |       |           |        |                                                                |                                                                                                                                                               |  |
| <b>Argentina</b>             | National            | Urban | 2018      | Survey | National Survey on Risk Factors (ENFR)- Argentina              | Health Ministry ( <a href="https://www.argentina.gob.ar/salud">https://www.argentina.gob.ar/salud</a> )                                                       |  |
| <b>Bahamas</b>               | National            | All   | 2019      | Survey | STEPS survey - Bahamas                                         | WHO NCD Microdata repository<br>( <a href="https://extranet.who.int/ncdsmicrodata/index.php/home">https://extranet.who.int/ncdsmicrodata/index.php/home</a> ) |  |
| <b>Barbados</b>              | National            | All   | 2007      | Survey | STEPS survey - Barbados                                        | WHO NCD Microdata repository<br>( <a href="https://extranet.who.int/ncdsmicrodata/index.php/home">https://extranet.who.int/ncdsmicrodata/index.php/home</a> ) |  |
| <b>Belize</b>                | National            | All   | 2005-2006 | Survey | Central America Diabetes Initiative (CAMDI) - Belize           | Lemp JM, et al. (2020) JAMA                                                                                                                                   |  |
| <b>Bermuda</b>               | National            | All   | 2011      | Survey | Health Survey of Adults (STEPS) - Bermuda                      | Government of Bermuda ( <a href="https://www.gov.bm/">https://www.gov.bm/</a> )                                                                               |  |
| <b>Bolivia</b>               | National            | All   | 2008      | Survey | Demographic Health Survey (ENDSA) - Bolivia                    | DHS Program ( <a href="https://dhsprogram.com/">https://dhsprogram.com/</a> )                                                                                 |  |
| <b>Brazil</b>                | National            | All   | 2019      | Admin  | Cancer Information System (SISCAN)                             | Health Ministry ( <a href="https://datasus.saude.gov.br/">https://datasus.saude.gov.br/</a> )                                                                 |  |
| <b>Canada</b>                | National            | All   | 2017      | Survey | Canadian Community Health Survey (CCHS)                        | Statistics Canada ( <a href="https://www.statcan.gc.ca/eng/start">https://www.statcan.gc.ca/eng/start</a> )                                                   |  |
| <b>Chile</b>                 | National            | All   | 2017      | Survey | National Socioeconomic Characterization Survey (CASEN) - Chile | Social Observatory<br>( <a href="http://observatorio.ministeriodesarrollosocial.gob.cl/">http://observatorio.ministeriodesarrollosocial.gob.cl/</a> )         |  |

|                                        |               |     |           |        |                                                                                               |                                                                                                                                                            |
|----------------------------------------|---------------|-----|-----------|--------|-----------------------------------------------------------------------------------------------|------------------------------------------------------------------------------------------------------------------------------------------------------------|
| <b>Colombia</b>                        | National      | All | 2019      | Admin  | Registry of specific protection and early detection activities (PEDT) - Colombia              | Minsalud ( <a href="https://www.sispro.gov.co/Pages/Home.aspx">https://www.sispro.gov.co/Pages/Home.aspx</a> )                                             |
| <b>Costa Rica</b>                      | National      | All | 2006      | Survey | National Health Survey (ENSA) - Costa Rica                                                    | BINASSS ( <a href="https://www.binasss.sa.cr/">https://www.binasss.sa.cr/</a> )                                                                            |
| <b>Cuba</b>                            | National      | All | 2010-2011 | Survey | National Survey of Risk Factors and Preventive Activities for Non-Communicable Diseases- Cuba | Editorial Medical Sciences ( <a href="http://www.ecimed.sld.cu/">http://www.ecimed.sld.cu/</a> )                                                           |
| <b>Dominica</b>                        | National      | All | 2008      | Survey | STEPS survey - Dominica                                                                       | WHO NCD Microdata repository ( <a href="https://extranet.who.int/ncdsmicrodata/index.php/home">https://extranet.who.int/ncdsmicrodata/index.php/home</a> ) |
| <b>Dominican Republic</b>              | National      | All | 2013      | Survey | Demographic Health Survey (DHS) - Dominican Republic                                          | DHS Program ( <a href="https://dhsprogram.com/">https://dhsprogram.com/</a> )                                                                              |
| <b>Ecuador</b>                         | National      | All | 2018      | Survey | STEPS survey - Ecuador                                                                        | WHO NCD Microdata repository ( <a href="https://extranet.who.int/ncdsmicrodata/index.php/home">https://extranet.who.int/ncdsmicrodata/index.php/home</a> ) |
| <b>El Salvador</b>                     | National      | All | 2008      | Survey | National Family Health Survey (FESAL) - El Salvador                                           | Central America Integration System - SICA ( <a href="https://www.sica.int/">https://www.sica.int/</a> )                                                    |
| <b>Greenland</b>                       | National      | All | 2011      | Admin  | Cancer registry - Greenland                                                                   | Holst S, et al. (2016) Gynecol Oncol                                                                                                                       |
| <b>Grenada</b>                         | National      | All | 2010      | Survey | STEPS survey - Grenada                                                                        | WHO NCD Microdata repository ( <a href="https://extranet.who.int/ncdsmicrodata/index.php/home">https://extranet.who.int/ncdsmicrodata/index.php/home</a> ) |
| <b>Guatemala</b>                       | National      | All | 2015      | Survey | Demographic Health Survey - Guatemala                                                         | DHS Program ( <a href="https://dhsprogram.com/">https://dhsprogram.com/</a> )                                                                              |
| <b>Guyana</b>                          | National      | All | 2016      | Survey | STEPS survey - Guyana                                                                         | WHO NCD Microdata repository ( <a href="https://extranet.who.int/ncdsmicrodata/index.php/home">https://extranet.who.int/ncdsmicrodata/index.php/home</a> ) |
| <b>Haiti</b>                           | National      | All | 2016-2017 | Survey | Mortality, Morbidity and Use of Services Survey (EMMUS) - Haiti                               | DHS Program ( <a href="https://dhsprogram.com/">https://dhsprogram.com/</a> )                                                                              |
| <b>Honduras</b>                        | National      | All | 2011-2012 | Survey | Demographic Health Survey (ENDESA) - Honduras                                                 | DHS Program ( <a href="https://dhsprogram.com/">https://dhsprogram.com/</a> )                                                                              |
| <b>Jamaica</b>                         | National      | All | 2016-2017 | Survey | Jamaica Health and Lifestyle Survey                                                           | Ministry of Health and Wellness ( <a href="https://www.moh.gov.jm/">https://www.moh.gov.jm/</a> )                                                          |
| <b>Mexico</b>                          | National      | All | 2018      | Survey | National Health and Nutrition Survey (ENSANUT) - Mexico                                       | National Health and Nutrition Survey ( <a href="https://ensanut.insp.mx/">https://ensanut.insp.mx/</a> )                                                   |
| <b>Nicaragua</b>                       | National      | All | 2012      | Survey | Demographic Health Survey (ENDESA) - Nicaragua                                                | National Institute of Development ( <a href="https://www.inide.gob.ni/">https://www.inide.gob.ni/</a> )                                                    |
| <b>Panama</b>                          | Not available |     |           |        |                                                                                               |                                                                                                                                                            |
| <b>Paraguay</b>                        | National      | All | 2008      | Survey | Demographic and Reproductive Health Survey (ENDSSR) - Paraguay                                | USAID ( <a href="https://www.usaid.gov/">https://www.usaid.gov/</a> )                                                                                      |
| <b>Peru</b>                            | National      | All | 2019      | Survey | Demographic and Family Health Survey (DHS) - Peru                                             | DHS Program ( <a href="https://dhsprogram.com/">https://dhsprogram.com/</a> )                                                                              |
| <b>Puerto Rico</b>                     | National      | All | 2018      | Survey | CDC. Behavioral Risk Factor Surveillance System (BRFSS) - Puerto Rico                         | Centers for Disease Control and Prevention - CDC ( <a href="https://www.cdc.gov/">https://www.cdc.gov/</a> )                                               |
| <b>St Kitts &amp; Nevis</b>            | National      | All | 2008      | Survey | STEPS survey - St Kidds & Nevis                                                               | WHO NCD Microdata repository ( <a href="https://extranet.who.int/ncdsmicrodata/index.php/home">https://extranet.who.int/ncdsmicrodata/index.php/home</a> ) |
| <b>St Lucia</b>                        | National      | All | 2012      | Survey | STEPS survey - St Lucia                                                                       | WHO NCD Microdata repository ( <a href="https://extranet.who.int/ncdsmicrodata/index.php/home">https://extranet.who.int/ncdsmicrodata/index.php/home</a> ) |
| <b>St Vincent &amp; The Grenadines</b> | National      | All | 2013-2014 | Survey | STEPS survey - St Vincent & The Grenadines                                                    | WHO NCD Microdata repository ( <a href="https://extranet.who.int/ncdsmicrodata/index.php/home">https://extranet.who.int/ncdsmicrodata/index.php/home</a> ) |

|                                 |                              |       |           |        |                                                                                                                                  |                                                                                                                                                               |
|---------------------------------|------------------------------|-------|-----------|--------|----------------------------------------------------------------------------------------------------------------------------------|---------------------------------------------------------------------------------------------------------------------------------------------------------------|
| <b>Suriname</b>                 | Not available                |       |           |        |                                                                                                                                  |                                                                                                                                                               |
| <b>Trinidad &amp; Tobago</b>    | National                     | All   | 2011      | Survey | STEPS survey - Trinidad & Tobago                                                                                                 | WHO NCD Microdata repository<br>( <a href="https://extranet.who.int/ncdsmicrodata/index.php/home">https://extranet.who.int/ncdsmicrodata/index.php/home</a> ) |
| <b>United States of America</b> | National                     | All   | 2019      | Survey | National Health Interview Survey in Adult US population (NHIS) - United States of America                                        | Centers for Disease Control and Prevention - CDC<br>( <a href="https://www.cdc.gov/">https://www.cdc.gov/</a> )                                               |
| <b>Uruguay</b>                  | National                     | All   | 2019      | Admin  | Information systems of the Cervical Cancer Prevention Program (PPCCU) & Honorary Commission for the Fight Against Cancer (CHLCC) | WHO country consultation (*)                                                                                                                                  |
| <b>Uruguay</b>                  | National                     | Urban | 2013      | Survey | STEPS survey - Uruguay                                                                                                           | WHO NCD Microdata repository<br>( <a href="https://extranet.who.int/ncdsmicrodata/index.php/home">https://extranet.who.int/ncdsmicrodata/index.php/home</a> ) |
| <b>Venezuela</b>                | Not available                |       |           |        |                                                                                                                                  |                                                                                                                                                               |
| <b>OCEANIA</b>                  |                              |       |           |        |                                                                                                                                  |                                                                                                                                                               |
| <b>American Samoa</b>           | Not available                |       |           |        |                                                                                                                                  |                                                                                                                                                               |
| <b>Australia</b>                | National                     | All   | 2019      | Admin  | National Cervical Screening Programme - Australia                                                                                | Australian Institute of Health and Welfare<br>( <a href="https://www.aihw.gov.au/">https://www.aihw.gov.au/</a> )                                             |
| <b>Cook Islands</b>             | Not available                |       |           |        |                                                                                                                                  |                                                                                                                                                               |
| <b>Fiji</b>                     | National                     | All   | 2006      | Admin  | Data from Hospital Registries                                                                                                    | Law I, et al. (2013) Sex Health.                                                                                                                              |
| <b>French Polynesia</b>         | National                     | All   | 2019      | Admin  | Data from screening program - French Polynesia                                                                                   | WHO country consultation (*)                                                                                                                                  |
| <b>FS Micronesia</b>            | Subnat - Chuuk State         | All   | 2016      | Survey | STEPS survey - Micronesia                                                                                                        | WHO NCD Microdata repository<br>( <a href="https://extranet.who.int/ncdsmicrodata/index.php/home">https://extranet.who.int/ncdsmicrodata/index.php/home</a> ) |
| <b>Kiribati</b>                 | National                     | All   | 2015-2016 | Survey | STEPS survey - Kiribati                                                                                                          | WHO NCD Microdata repository<br>( <a href="https://extranet.who.int/ncdsmicrodata/index.php/home">https://extranet.who.int/ncdsmicrodata/index.php/home</a> ) |
| <b>Marshall Islands</b>         | National                     | All   | 2017      | Survey | STEPS survey - Marshall Islands                                                                                                  | WHO NCD Microdata repository<br>( <a href="https://extranet.who.int/ncdsmicrodata/index.php/home">https://extranet.who.int/ncdsmicrodata/index.php/home</a> ) |
| <b>Nauru</b>                    | National                     | All   | 2015      | Survey | STEPS survey - Nauru                                                                                                             | WHO NCD Microdata repository<br>( <a href="https://extranet.who.int/ncdsmicrodata/index.php/home">https://extranet.who.int/ncdsmicrodata/index.php/home</a> ) |
| <b>New Zealand</b>              | National                     | All   | 2019      | Admin  | National Cervical Screening Programme (NCSP) - New Zealand                                                                       | National Screening Unit ( <a href="https://minhealthnz.shinyapps.io/nsu-ncsp-coverage/">https://minhealthnz.shinyapps.io/nsu-ncsp-coverage/</a> )             |
| <b>Niue</b>                     | Not available                |       |           |        |                                                                                                                                  |                                                                                                                                                               |
| <b>Palau</b>                    | National                     | All   | 2016      | Survey | STEPS survey - Palau                                                                                                             | WHO NCD Microdata repository<br>( <a href="https://extranet.who.int/ncdsmicrodata/index.php/home">https://extranet.who.int/ncdsmicrodata/index.php/home</a> ) |
| <b>Papua New Guinea</b>         | Subnat - Mount Hagen, Goroka | Urban | 2011      | Admin  | Data from Goroka General Hospital and Mt Hagen General Hospital                                                                  | Toliman PJ, et al. (2018) Papillomavirus Res.                                                                                                                 |
| <b>Samoa</b>                    | Not available                |       |           |        |                                                                                                                                  |                                                                                                                                                               |
| <b>Solomon Islands</b>          | National                     | All   | 2015      | Survey | STEPS survey - Solomon Islands                                                                                                   | WHO NCD Microdata repository<br>( <a href="https://extranet.who.int/ncdsmicrodata/index.php/home">https://extranet.who.int/ncdsmicrodata/index.php/home</a> ) |
| <b>Tokelau</b>                  | National                     | All   | 2014      | Survey | STEPS survey - Tokelau                                                                                                           | WHO NCD Microdata repository<br>( <a href="https://extranet.who.int/ncdsmicrodata/index.php/home">https://extranet.who.int/ncdsmicrodata/index.php/home</a> ) |

|                      |               |     |           |        |                                                                                 |                                                                                                                                                               |
|----------------------|---------------|-----|-----------|--------|---------------------------------------------------------------------------------|---------------------------------------------------------------------------------------------------------------------------------------------------------------|
| <b>Tonga</b>         | National      | All | 2017      | Survey | STEPS survey - Tonga                                                            | WHO NCD Microdata repository<br>( <a href="https://extranet.who.int/ncdsmicrodata/index.php/home">https://extranet.who.int/ncdsmicrodata/index.php/home</a> ) |
| <b>Tuvalu</b>        | National      | All | 2015      | Survey | STEPS survey - Tuvalu                                                           | WHO NCD Microdata repository<br>( <a href="https://extranet.who.int/ncdsmicrodata/index.php/home">https://extranet.who.int/ncdsmicrodata/index.php/home</a> ) |
| <b>Vanuatu</b>       | Not available |     |           |        |                                                                                 |                                                                                                                                                               |
| <b>ASIA</b>          |               |     |           |        |                                                                                 |                                                                                                                                                               |
| <b>Afghanistan</b>   | Not available |     |           |        |                                                                                 |                                                                                                                                                               |
| <b>Armenia</b>       | National      | All | 2015-2016 | Survey | Health System Performance Assessment (STEPS) - Armenia                          | National Institute of Health Avdalbekyan ( <a href="https://nih.am/am">https://nih.am/am</a> )                                                                |
| <b>Azerbaijan</b>    | National      | All | 2017      | Survey | STEPS survey - Azerbaijan                                                       | WHO NCD Microdata repository<br>( <a href="https://extranet.who.int/ncdsmicrodata/index.php/home">https://extranet.who.int/ncdsmicrodata/index.php/home</a> ) |
| <b>Bahrain</b>       | Not available |     |           |        |                                                                                 |                                                                                                                                                               |
| <b>Bangladesh</b>    | National      | All | 2018      | Survey | STEPS survey - Bangladesh                                                       | WHO NCD Microdata repository<br>( <a href="https://extranet.who.int/ncdsmicrodata/index.php/home">https://extranet.who.int/ncdsmicrodata/index.php/home</a> ) |
| <b>Bhutan</b>        | National      | All | 2014      | Survey | STEPS survey - Buthan                                                           | WHO NCD Microdata repository<br>( <a href="https://extranet.who.int/ncdsmicrodata/index.php/home">https://extranet.who.int/ncdsmicrodata/index.php/home</a> ) |
| <b>Brunei</b>        | National      | All | 2015-2016 | Survey | STEPS survey - Brunei                                                           | WHO NCD Microdata repository<br>( <a href="https://extranet.who.int/ncdsmicrodata/index.php/home">https://extranet.who.int/ncdsmicrodata/index.php/home</a> ) |
| <b>Brunei</b>        | National      | All | 2019      | Admin  | National registry - Brunei                                                      | WHO country consultation (*)                                                                                                                                  |
| <b>Cambodia</b>      | Not available |     |           |        |                                                                                 |                                                                                                                                                               |
| <b>China</b>         | National      | All | 2015      | Survey | National Survey - Chinese Chronic Disease and Risk Factor Surveillance (CCDRFS) | Zhang, M, et al. (2020) China CDC Weekly.                                                                                                                     |
| <b>DPR Korea</b>     | Not available |     |           |        |                                                                                 |                                                                                                                                                               |
| <b>Georgia</b>       | National      | All | 2016      | Survey | STEPS survey - Georgia                                                          | WHO NCD Microdata repository<br>( <a href="https://extranet.who.int/ncdsmicrodata/index.php/home">https://extranet.who.int/ncdsmicrodata/index.php/home</a> ) |
| <b>Hong Kong SAR</b> | National      | All | 2018-2019 | Survey | Health Behaviour Survey (HBS) - Hong Kong                                       | Centre for Health protection<br>( <a href="https://www.chp.gov.hk/en/index.html">https://www.chp.gov.hk/en/index.html</a> )                                   |
| <b>India</b>         | National      | All | 2017-2018 | Survey | National NCD Monitoring Survey (NNMS) - India                                   | National Centre for Disease Informatics and Research - NCDIR<br>( <a href="https://www.ncdirindia.org/NCD.aspx">https://www.ncdirindia.org/NCD.aspx</a> )     |
| <b>Indonesia</b>     | National      | All | 2019      | Admin  | Ministry of Health - Indonesia                                                  | Ministry of Health Republic of Indonesia<br>( <a href="https://www.kemkes.go.id/">https://www.kemkes.go.id/</a> )                                             |
| <b>Iran</b>          | National      | All | 2016      | Survey | STEPS survey - Iran                                                             | WHO NCD Microdata repository<br>( <a href="https://extranet.who.int/ncdsmicrodata/index.php/home">https://extranet.who.int/ncdsmicrodata/index.php/home</a> ) |
| <b>Iraq</b>          | National      | All | 2015      | Survey | STEPS survey - Iraq                                                             | WHO NCD Microdata repository<br>( <a href="https://extranet.who.int/ncdsmicrodata/index.php/home">https://extranet.who.int/ncdsmicrodata/index.php/home</a> ) |
| <b>Israel</b>        | National      | All | 2017      | Admin  | Israel Social Survey                                                            | Israel Central Bureau of Statistics<br>( <a href="https://www.cbs.gov.il/he/pages/default.aspx">https://www.cbs.gov.il/he/pages/default.aspx</a> )            |
| <b>Japan</b>         | National      | All | 2015      | Survey | Comprehensive Survey of Living Conditions - Japan                               | ministry of health Lavour and Wellfare<br>( <a href="https://www.mhlw.go.jp/index.html">https://www.mhlw.go.jp/index.html</a> )                               |
| <b>Jordan</b>        | National      | All | 2019      | Survey | STEPS Survey - Jordan                                                           | WHO NCD Microdata repository<br>( <a href="https://extranet.who.int/ncdsmicrodata/index.php/home">https://extranet.who.int/ncdsmicrodata/index.php/home</a> ) |
| <b>Kazakhstan</b>    | National      | All | 2017      | Admin  | Official reports                                                                | Personal communication (*)                                                                                                                                    |

|                          |               |     |           |        |                                                                                               |                                                                                                                                                               |
|--------------------------|---------------|-----|-----------|--------|-----------------------------------------------------------------------------------------------|---------------------------------------------------------------------------------------------------------------------------------------------------------------|
| <b>Kwait</b>             | National      | All | 2014      | Survey | STEPS survey - Kuwait                                                                         | WHO NCD Microdata repository<br>( <a href="https://extranet.who.int/ncdsmicrodata/index.php/home">https://extranet.who.int/ncdsmicrodata/index.php/home</a> ) |
| <b>Kyrgyzstan</b>        | National      | All | 2013      | Survey | STEPS survey - Kyrgyzstan                                                                     | WHO NCD Microdata repository<br>( <a href="https://extranet.who.int/ncdsmicrodata/index.php/home">https://extranet.who.int/ncdsmicrodata/index.php/home</a> ) |
| <b>Laos</b>              | National      | All | 2003      | Survey | World Health Survey (WHS) - Laos                                                              | WHO World Health Survey<br>( <a href="https://www.who.int/healthinfo/survey/en/">https://www.who.int/healthinfo/survey/en/</a> )                              |
| <b>Lebanon</b>           | National      | All | 2016-2017 | Survey | STEPS survey - Lebanon                                                                        | WHO NCD Microdata repository<br>( <a href="https://extranet.who.int/ncdsmicrodata/index.php/home">https://extranet.who.int/ncdsmicrodata/index.php/home</a> ) |
| <b>Malaysia</b>          | National      | All | 2019      | Survey | National Health and Morbidity Survey (NHMS) - Malaysia                                        | Institute for Public Health ( <a href="http://iku.moh.gov.my/">http://iku.moh.gov.my/</a> )                                                                   |
| <b>Maldives</b>          | National      | All | 2012-2013 | Survey | Health survey - Maldives                                                                      | Basu P, et al. (2014) Asian Pac J Cancer Prev.                                                                                                                |
| <b>Mongolia</b>          | National      | All | 2018      | Survey | Social Indicator Sample Survey (SISS) - Mongolia                                              | National Statistics Office Mongolia ( <a href="https://www.en.nso.mn/">https://www.en.nso.mn/</a> )                                                           |
| <b>Myanmar</b>           | National      | All | 2014      | Survey | National Survey on Diabetes Mellitus and Risk Factors for Non Communicable Diseases - Myanmar | WHO NCD Microdata repository<br>( <a href="https://extranet.who.int/ncdsmicrodata/index.php/home">https://extranet.who.int/ncdsmicrodata/index.php/home</a> ) |
| <b>Nepal</b>             | National      | All | 2019      | Survey | STEPS survey - Nepal                                                                          | WHO NCD Microdata repository<br>( <a href="https://extranet.who.int/ncdsmicrodata/index.php/home">https://extranet.who.int/ncdsmicrodata/index.php/home</a> ) |
| <b>Oman</b>              | National      | All | 2017      | Survey | STEPS survey - Oman                                                                           | WHO NCD Microdata repository<br>( <a href="https://extranet.who.int/ncdsmicrodata/index.php/home">https://extranet.who.int/ncdsmicrodata/index.php/home</a> ) |
| <b>Pakistan</b>          | National      | All | 2013-2014 | Survey | STEPS survey - Pakistan                                                                       | WHO NCD Microdata repository<br>( <a href="https://extranet.who.int/ncdsmicrodata/index.php/home">https://extranet.who.int/ncdsmicrodata/index.php/home</a> ) |
| <b>Palestine</b>         | Not available |     |           |        |                                                                                               |                                                                                                                                                               |
| <b>Philippines</b>       | National      | All | 2017      | Survey | Demographic and Health Survey (DHS) - Philippines                                             | DHS Program ( <a href="https://dhsprogram.com/">https://dhsprogram.com/</a> )                                                                                 |
| <b>Qatar</b>             | National      | All | 2006      | Survey | World Health Survey (WHS) - Qatar                                                             | WHO World Health Survey<br>( <a href="https://www.who.int/healthinfo/survey/en/">https://www.who.int/healthinfo/survey/en/</a> )                              |
| <b>Republic of Korea</b> | National      | All | 2019      | Survey | Korean National Cancer Screening Survey (KNCSS)                                               | WHO country consultation (*)                                                                                                                                  |
| <b>Saudi Arabia</b>      | National      | All | 2008      | Survey | World Health Survey (WHS) - Saudi Arabia                                                      | WHO World Health Survey<br>( <a href="https://www.who.int/healthinfo/survey/en/">https://www.who.int/healthinfo/survey/en/</a> )                              |
| <b>Singapore</b>         | National      | All | 2019      | Survey | National Health Survey (NHS) - Singapore                                                      | Personal communication WHO country consultation                                                                                                               |
| <b>Sri Lanka</b>         | National      | All | 2016      | Survey | Demographic and Health Survey (DHS) - Sri Lanka                                               | DHS Program ( <a href="https://dhsprogram.com/">https://dhsprogram.com/</a> )                                                                                 |
| <b>Syria</b>             | National      | All | 2018      | Survey | Multipurpose Demographic Survey - Syria                                                       | WHO country consultation (*)                                                                                                                                  |
| <b>Tajikistan</b>        | National      | All | 2016      | Survey | STEPS survey - Tajikistan                                                                     | WHO NCD Microdata repository<br>( <a href="https://extranet.who.int/ncdsmicrodata/index.php/home">https://extranet.who.int/ncdsmicrodata/index.php/home</a> ) |
| <b>Thailand</b>          | National      | All | 2010      | Survey | Thai Behavioral Risk Factor Surveillance System (BRFSS) survey                                | Chongthawonsatid S. (2017) PLoS One.                                                                                                                          |
| <b>Timor-Leste</b>       | National      | All | 2014      | Survey | STEPS survey - Timor Leste                                                                    | WHO NCD Microdata repository<br>( <a href="https://extranet.who.int/ncdsmicrodata/index.php/home">https://extranet.who.int/ncdsmicrodata/index.php/home</a> ) |
| <b>Turkey</b>            | National      | All | 2019      | Admin  | Data from the national registry - Turkey                                                      | WHO country consultation (*)                                                                                                                                  |

|                             |               |     |      |        |                                                  |                                                                                                                                                               |
|-----------------------------|---------------|-----|------|--------|--------------------------------------------------|---------------------------------------------------------------------------------------------------------------------------------------------------------------|
| <b>Turkmenistan</b>         | National      | All | 2013 | Survey | STEPS survey - Turkmenistan                      | WHO NCD Microdata repository<br>( <a href="https://extranet.who.int/ncdsmicrodata/index.php/home">https://extranet.who.int/ncdsmicrodata/index.php/home</a> ) |
| <b>United Arab Emirates</b> | National      | All | 2008 | Survey | World Health Survey (WHS) - United Arab Emirates | WHO World Health Survey<br>( <a href="https://www.who.int/healthinfo/survey/en/">https://www.who.int/healthinfo/survey/en/</a> )                              |
| <b>Uzbekistan</b>           | National      | All | 2014 | Survey | STEPS survey - Uzbekistan                        | WHO NCD Microdata repository<br>( <a href="https://extranet.who.int/ncdsmicrodata/index.php/home">https://extranet.who.int/ncdsmicrodata/index.php/home</a> ) |
| <b>Viet Nam</b>             | National      | All | 2015 | Survey | STEPS survey - Viet Nam                          | WHO NCD Microdata repository<br>( <a href="https://extranet.who.int/ncdsmicrodata/index.php/home">https://extranet.who.int/ncdsmicrodata/index.php/home</a> ) |
| <b>Yemen</b>                | Not available |     |      |        |                                                  |                                                                                                                                                               |

(\*) Contact: <https://hpvcentre.net/contactus.php>

**Table S2. Data sources for cervical cancer screening recommendations by country.**

| Area                            | Screening policy | Reference                                                                                                                                                                                                                                                                                                                                                                                          |
|---------------------------------|------------------|----------------------------------------------------------------------------------------------------------------------------------------------------------------------------------------------------------------------------------------------------------------------------------------------------------------------------------------------------------------------------------------------------|
| <b>EUROPE</b>                   |                  |                                                                                                                                                                                                                                                                                                                                                                                                    |
| <b>Albania</b>                  | Yes              | Ministry of Health Albania. 2019. New cervical cancer programme in Albania [Manastirliu: Program i ri për kancerin e qafës së mitrës, ritëm financimin publik për shëndetësinë] ( <a href="https://shendetesia.gov.al/">https://shendetesia.gov.al/</a> )<br>Public Health Institute Albania. Cervical cancer screening programme. ( <a href="http://www.ishp.gov.al">http://www.ishp.gov.al</a> ) |
| <b>Andorra</b>                  | No               |                                                                                                                                                                                                                                                                                                                                                                                                    |
| <b>Austria</b>                  | Yes              | Public Health Service Austria. Annual preventive medical check-up [Vorsorgeuntersuchung (Gesundenuntersuchung)] ( <a href="https://www.gesundheit.gv.at/">https://www.gesundheit.gv.at/</a> )                                                                                                                                                                                                      |
| <b>Belarus</b>                  | Yes              | Personal communication WHO country consultation (*)                                                                                                                                                                                                                                                                                                                                                |
| <b>Belgium</b>                  | Yes              | Flemish Cervical cancer screening programme [Bevolkings onderzoek baarmoeder halskanker] ( <a href="https://baarmoederhalskanker.bevolkingsonderzoek.be">https://baarmoederhalskanker.bevolkingsonderzoek.be</a> )<br>Centre Communautaire de Reference pour le dépistage des cancers ( <a href="https://www.ccref.org">https://www.ccref.org</a> )                                                |
| <b>Bosnia &amp; Herzegovina</b> | Yes              | Personal communication (*)                                                                                                                                                                                                                                                                                                                                                                         |
| <b>Bulgaria</b>                 | Yes              | Personal communication WHO country consultation (*)                                                                                                                                                                                                                                                                                                                                                |
| <b>Croatia</b>                  | Yes              | Croatian Institute for Public Health. National Programme for Early detection of cervical cancer( <a href="https://javno-zdravlje.hr/">https://javno-zdravlje.hr/</a> )                                                                                                                                                                                                                             |
| <b>Cyprus</b>                   | Yes              | WHO Country Capacity Survey 2019. WHO Global Health Observatory ( <a href="https://www.who.int/data/gho">https://www.who.int/data/gho</a> )                                                                                                                                                                                                                                                        |
| <b>Czechia</b>                  | Yes              | Czech National Cervical Screening Programme ( <a href="https://www.cervix.cz/index-en.php">https://www.cervix.cz/index-en.php</a> )                                                                                                                                                                                                                                                                |
| <b>Denmark</b>                  | Yes              | The Danish Health Authority. Cervical cancer screening [Screening for livmoderhalskræft] ( <a href="https://www.sst.dk/da">https://www.sst.dk/da</a> )                                                                                                                                                                                                                                             |
| <b>Estonia</b>                  | Yes              | Nordscreen. Cancer screening Estonia ( <a href="https://nordscreen.org/">https://nordscreen.org/</a> )                                                                                                                                                                                                                                                                                             |
| <b>Finland</b>                  | Yes              | Current Care Guidelines. Cervical cancer screening guidelines ( <a href="https://www.kaypahoito.fi/en/">https://www.kaypahoito.fi/en/</a> )                                                                                                                                                                                                                                                        |
| <b>France</b>                   | Yes              | Haute Autorité de Santé. Dépistage et Prévention Du Cancer Du Col de l'utérus. Actualisation Du Référentiel de Pratiques de l'examen Périodique de Santé (EPS).; 2013. ( <a href="https://www.has-sante.fr/jcms/pprd_2986129/en/home">https://www.has-sante.fr/jcms/pprd_2986129/en/home</a> )                                                                                                     |
| <b>Germany</b>                  | Yes              | Federal joint Committee [Gemeinsamer bundesausschuss. Pressemitteilung   Methodenbewertung]. Future Organized cervical Cancer Screening Programme [Früherkennung von Gebärmutterhalskrebs künftig als organisiertes Programm] ( <a href="https://www.g-ba.de/">https://www.g-ba.de/</a> )                                                                                                          |
| <b>Greece</b>                   | Yes              | Government of the Hellenic Republic. Joint Ministerial Decision n. ΕΑΛΕΤ.Π. 80157 published in the Government Gazette n. 4898/B/2018                                                                                                                                                                                                                                                               |
| <b>Hungary</b>                  | Yes              | Boncz I, et al. Organized, nationwide cervical cancer screening programme in Hungary. Gynecol Oncol. 2007 Jul;106(1):272-3.<br>Kívés Z, et al. Cancer screening policy in Hungary. Int J Cancer. 2018 Aug 15;143(4):1003-1004.                                                                                                                                                                     |
| <b>Iceland</b>                  | Yes              | Icelandic Cancer Society ( <a href="https://www.krabb.is/">https://www.krabb.is/</a> )                                                                                                                                                                                                                                                                                                             |
| <b>Ireland</b>                  | Yes              | Health Service, Ireland. Cervical screening - CervicalCheck ( <a href="https://www.hse.ie/eng/">https://www.hse.ie/eng/</a> )                                                                                                                                                                                                                                                                      |



|                         |     |                                                                                                                                                                                                                                                                                                                                                                                                                                                                                                                                                                                                                                                                                                                                                                                                                                                                                                                                                                                                                                                                                                                                                                                                                                                                                                                                                                                                                                                                                                                                                                                                                                                                                                                                                                                                                                                                                                                                                                                                                                                                                                                                                                                                                                                                                                                                                                                                                                                                                                                                                                                                                                                                                                                                                                                                                                                                                                                                                                                                                                                                                                                                                                                                                                                                                                                                                                                                                                                                                                                                                                                                                                                                                                                                                                                                                                                                                                                                                                                                                                                                                                                                                                                                                                                                                                                                                                                                                            |
|-------------------------|-----|----------------------------------------------------------------------------------------------------------------------------------------------------------------------------------------------------------------------------------------------------------------------------------------------------------------------------------------------------------------------------------------------------------------------------------------------------------------------------------------------------------------------------------------------------------------------------------------------------------------------------------------------------------------------------------------------------------------------------------------------------------------------------------------------------------------------------------------------------------------------------------------------------------------------------------------------------------------------------------------------------------------------------------------------------------------------------------------------------------------------------------------------------------------------------------------------------------------------------------------------------------------------------------------------------------------------------------------------------------------------------------------------------------------------------------------------------------------------------------------------------------------------------------------------------------------------------------------------------------------------------------------------------------------------------------------------------------------------------------------------------------------------------------------------------------------------------------------------------------------------------------------------------------------------------------------------------------------------------------------------------------------------------------------------------------------------------------------------------------------------------------------------------------------------------------------------------------------------------------------------------------------------------------------------------------------------------------------------------------------------------------------------------------------------------------------------------------------------------------------------------------------------------------------------------------------------------------------------------------------------------------------------------------------------------------------------------------------------------------------------------------------------------------------------------------------------------------------------------------------------------------------------------------------------------------------------------------------------------------------------------------------------------------------------------------------------------------------------------------------------------------------------------------------------------------------------------------------------------------------------------------------------------------------------------------------------------------------------------------------------------------------------------------------------------------------------------------------------------------------------------------------------------------------------------------------------------------------------------------------------------------------------------------------------------------------------------------------------------------------------------------------------------------------------------------------------------------------------------------------------------------------------------------------------------------------------------------------------------------------------------------------------------------------------------------------------------------------------------------------------------------------------------------------------------------------------------------------------------------------------------------------------------------------------------------------------------------------------------------------------------------------------------------------------------|
| <b>Italy</b>            | Yes | <p>Regione Piemonte. Bollettino Ufficiale. N.20 del 16.Mag.2013. Deliberazione della Giunta Regionale 23 Aprile 2013, n.21-5705. Approvazione della modifica del programma regionale di screening oncologico, "prevenzione serena" per i tumori della cervice uterina. Aggiornamento dell'allegato A della D.G.R. n.111-3632 del 02.08.2006.</p> <p>Regione Trento. Azienda Provinciale per i Servizi Sanitari Trento – via Degasperri 79. Verbale di deliberazione del Direttore Generale Reg. delib. n. 88/2017. Nuovo programma di screening di diagnosi precoce del carcinoma del collo dell'utero con test HPV.</p> <p>Regione Veneto. Bur n.59 del 13.06.2014 (Codice interno: 275291) Deliberazione della Giunta Regionale n.772 del 27.mag.2014. Modifica del programma regionale di screening oncologico per i tumori della cervice uterina con utilizzo del test HPV-DNA come test primario a parziale sostituzione del Pap Test.</p> <p>Regione Liguria. Secretaria Generale Gabinetto del Presidente della Giunta Regionale. N.3182 del 31.05.2013. Valutazione dell'uso del test HPV DNA come test primario per l'individuazione del carcinoma del collo dell'utero nella fascia d'eta 30/35-64 anni. Provvedimenti.</p> <p>Regione Emilia Romagna. Assessorato politiche per la salute. Circolare N.8; PG. 2015. 0509168. del 17.07.2015. Indicazioni per la riconversione del programma di screening per la prevenzione e diagnosi precoce dei tumori del collo dell'utero con HPV DNA test: criteri di ammissibilita e modalita di erogazione del test.</p> <p>Regione Toscana. Giunta regionale estratto dal verbale della seduta del 26.11.2012 (punto N.33) Delibera N 1049 del 26.11.2012. Programma di screening regionale per il tumore della cervice uterina con HPV primario in sostituzione del Pap-Test. Progettazione e modalita attuative.</p> <p>Regione Umbria. Supplemento ordinario n. 2 al «Bollettino Ufficiale» - serie generale - n. 33 del 24.Lug.2013. Direzione Redazione e Amministrazione presso presidenza della giunta regionale Perugia. Deliberazione della Giunta Regionale 28.Mag.2013, n.506. Approvazione Piano Regionale di Prevenzione per l'anno 2013.</p> <p>Regione Lazio. 13/07/2017 - Bollettino Ufficiale della regione Lazio N.56 - Supplemento n.1. Decreto del Commissario ad Acta 28 giugno 2017, n. U00240. Programma Operativo 2016-2018 (DCA 52/2017). Approvazione documento di indirizzo per il programma di screening del cervicocarcinoma della Regione Lazio. Modello organizzativo e protocollo diagnosticoterapeutico.</p> <p>Segnan N, et al. Cervical cancer screening in Italy. Eur J Cancer. 2000;36(17):2233-2234.</p> <p>Ronco G, et al. Extension of organized cervical cancer screening programmes in Italy and their process indicators, 2011-2012 activity Estensione dei programmi organizzati di screening cervicale in Italia e loro indicatori di processo Marco Zappa 2 and the Italian cervica. Epidemiol Prev Epidemiol Prev. 2015;39(1):1-125.</p> <p>Regione Puglia. Bollettino Ufficiale della Regione Puglia - n.30 del 27-2-2018. Deliberazione della Giunta Regionale 06.feb.2018, n.129. Programma Operativo 2016-2018. Piano delle azioni avviate nel biennio 2016-2017 e delle misure da attuare nel 2018.</p> <p>Regione Basilicata. Dipartimento Salute, sicurezza e solidarieta sociale , servizi alla persona e alla comunita. Deliberazione N. 668 del 29. Mag. 2012. Approvazione Piano Regionale Screening Oncologici.</p> <p>Regione Calabria. Programma Operativo 2013-2015. Programma 11 - Sanità pubblica. Azioni 11.2.3, 11.2.4 ed 11.2.5 "Screening per il cancro della cervice" ~ integrazioni e modifiche DCA n. 50/2015. DCA N. 126 del 24. Nov. 2015</p> <p>Regione Siciliana. Dipartimento Attivita Sanitaire Osservatorio Epidemiologico. Passaggio del Pap test all'HPV DNA come test primario per lo screening del cervicocarcinoma. D.A.n.08 del 03.Gen.2017.</p> <p>Regione Sardegna. Assessorato dell'igiene e sanita e dell'assistenza sociale. Allegato alla Delib.G.R. n. 56/17 del 20.12.2017. Piano Regionale di Prevenzione (PRP) 2014-2018. Programma P-1.4 Identificazione precoce dei tumori oggetto di screening e presa in carico sistemica Azione P-1.4.3. Riorganizzazione del percorso dello screening del cervicocarcinoma con l'introduzione test HPV-DNA come test primario.</p> |
| <b>Latvia</b>           | Yes | Vīberga I, et al. Cervical cancer screening in Latvia: a brief history and recent improvements (2009-2011). Acta Dermatovenerol Alp Pannonica Adriat. 2013;22(1):27-30. Latvia, National Health Service ( <a href="http://www.vm.gov.lv">http://www.vm.gov.lv</a> )                                                                                                                                                                                                                                                                                                                                                                                                                                                                                                                                                                                                                                                                                                                                                                                                                                                                                                                                                                                                                                                                                                                                                                                                                                                                                                                                                                                                                                                                                                                                                                                                                                                                                                                                                                                                                                                                                                                                                                                                                                                                                                                                                                                                                                                                                                                                                                                                                                                                                                                                                                                                                                                                                                                                                                                                                                                                                                                                                                                                                                                                                                                                                                                                                                                                                                                                                                                                                                                                                                                                                                                                                                                                                                                                                                                                                                                                                                                                                                                                                                                                                                                                                        |
| <b>Lithuania</b>        | Yes | Kurtinaitienė R, et al. Increasing attendance in a cervical cancer screening programme by personal invitation: experience of a Lithuanian primary health care centre. Acta Med Litu. 2016;23(3):180-184.                                                                                                                                                                                                                                                                                                                                                                                                                                                                                                                                                                                                                                                                                                                                                                                                                                                                                                                                                                                                                                                                                                                                                                                                                                                                                                                                                                                                                                                                                                                                                                                                                                                                                                                                                                                                                                                                                                                                                                                                                                                                                                                                                                                                                                                                                                                                                                                                                                                                                                                                                                                                                                                                                                                                                                                                                                                                                                                                                                                                                                                                                                                                                                                                                                                                                                                                                                                                                                                                                                                                                                                                                                                                                                                                                                                                                                                                                                                                                                                                                                                                                                                                                                                                                   |
| <b>Luxembourg</b>       | No  |                                                                                                                                                                                                                                                                                                                                                                                                                                                                                                                                                                                                                                                                                                                                                                                                                                                                                                                                                                                                                                                                                                                                                                                                                                                                                                                                                                                                                                                                                                                                                                                                                                                                                                                                                                                                                                                                                                                                                                                                                                                                                                                                                                                                                                                                                                                                                                                                                                                                                                                                                                                                                                                                                                                                                                                                                                                                                                                                                                                                                                                                                                                                                                                                                                                                                                                                                                                                                                                                                                                                                                                                                                                                                                                                                                                                                                                                                                                                                                                                                                                                                                                                                                                                                                                                                                                                                                                                                            |
| <b>Malta</b>            | Yes | Ministry for Health, Malta. Cervix Screening Programme ( <a href="https://deputyprimeminister.gov.mt/en/Pages/health.aspx">https://deputyprimeminister.gov.mt/en/Pages/health.aspx</a> )                                                                                                                                                                                                                                                                                                                                                                                                                                                                                                                                                                                                                                                                                                                                                                                                                                                                                                                                                                                                                                                                                                                                                                                                                                                                                                                                                                                                                                                                                                                                                                                                                                                                                                                                                                                                                                                                                                                                                                                                                                                                                                                                                                                                                                                                                                                                                                                                                                                                                                                                                                                                                                                                                                                                                                                                                                                                                                                                                                                                                                                                                                                                                                                                                                                                                                                                                                                                                                                                                                                                                                                                                                                                                                                                                                                                                                                                                                                                                                                                                                                                                                                                                                                                                                   |
| <b>Monaco</b>           | Yes | Public services of the Princely Government of Monaco. Screening for cervical cancer. Available at: <a href="http://en.service-public-particuliers.gouv.mc/Social-health-and-families/Public-health/Prevention-and-screening/Screening-for-cervical-cancer">http://en.service-public-particuliers.gouv.mc/Social-health-and-families/Public-health/Prevention-and-screening/Screening-for-cervical-cancer</a>                                                                                                                                                                                                                                                                                                                                                                                                                                                                                                                                                                                                                                                                                                                                                                                                                                                                                                                                                                                                                                                                                                                                                                                                                                                                                                                                                                                                                                                                                                                                                                                                                                                                                                                                                                                                                                                                                                                                                                                                                                                                                                                                                                                                                                                                                                                                                                                                                                                                                                                                                                                                                                                                                                                                                                                                                                                                                                                                                                                                                                                                                                                                                                                                                                                                                                                                                                                                                                                                                                                                                                                                                                                                                                                                                                                                                                                                                                                                                                                                               |
| <b>Montenegro</b>       | Yes | Public Health Institute, Montenegro. Screening department [Odjeljenje za skrininge] ( <a href="https://www.ijzcg.me/">https://www.ijzcg.me/</a> )                                                                                                                                                                                                                                                                                                                                                                                                                                                                                                                                                                                                                                                                                                                                                                                                                                                                                                                                                                                                                                                                                                                                                                                                                                                                                                                                                                                                                                                                                                                                                                                                                                                                                                                                                                                                                                                                                                                                                                                                                                                                                                                                                                                                                                                                                                                                                                                                                                                                                                                                                                                                                                                                                                                                                                                                                                                                                                                                                                                                                                                                                                                                                                                                                                                                                                                                                                                                                                                                                                                                                                                                                                                                                                                                                                                                                                                                                                                                                                                                                                                                                                                                                                                                                                                                          |
| <b>Netherlands</b>      | Yes | National Institute for Public Health and the Environment, The Netherlands. Cervical Cancer Screening Programme ( <a href="https://www.rivm.nl">https://www.rivm.nl</a> )                                                                                                                                                                                                                                                                                                                                                                                                                                                                                                                                                                                                                                                                                                                                                                                                                                                                                                                                                                                                                                                                                                                                                                                                                                                                                                                                                                                                                                                                                                                                                                                                                                                                                                                                                                                                                                                                                                                                                                                                                                                                                                                                                                                                                                                                                                                                                                                                                                                                                                                                                                                                                                                                                                                                                                                                                                                                                                                                                                                                                                                                                                                                                                                                                                                                                                                                                                                                                                                                                                                                                                                                                                                                                                                                                                                                                                                                                                                                                                                                                                                                                                                                                                                                                                                   |
| <b>North Macedonia,</b> | Yes | Institute of Public Health of Republic of Nord Macedonia, Effects of the screening programme for early detection of cervical cancer in the Republic of Macedonia on the occasion of "Week for prevention of cervical cancer", 2015. ( <a href="https://www.iph.mk/">https://www.iph.mk/</a> )<br>Government of the Republic of Macedonia. Official Gazette of the Republic of Macedonia, no. 196 of 12.26.2014.                                                                                                                                                                                                                                                                                                                                                                                                                                                                                                                                                                                                                                                                                                                                                                                                                                                                                                                                                                                                                                                                                                                                                                                                                                                                                                                                                                                                                                                                                                                                                                                                                                                                                                                                                                                                                                                                                                                                                                                                                                                                                                                                                                                                                                                                                                                                                                                                                                                                                                                                                                                                                                                                                                                                                                                                                                                                                                                                                                                                                                                                                                                                                                                                                                                                                                                                                                                                                                                                                                                                                                                                                                                                                                                                                                                                                                                                                                                                                                                                            |
| <b>Norway</b>           | Yes | Cancer Registry of Norway. CervicalScreen Norway ( <a href="https://www.kreftregisteret.no/">https://www.kreftregisteret.no/</a> )                                                                                                                                                                                                                                                                                                                                                                                                                                                                                                                                                                                                                                                                                                                                                                                                                                                                                                                                                                                                                                                                                                                                                                                                                                                                                                                                                                                                                                                                                                                                                                                                                                                                                                                                                                                                                                                                                                                                                                                                                                                                                                                                                                                                                                                                                                                                                                                                                                                                                                                                                                                                                                                                                                                                                                                                                                                                                                                                                                                                                                                                                                                                                                                                                                                                                                                                                                                                                                                                                                                                                                                                                                                                                                                                                                                                                                                                                                                                                                                                                                                                                                                                                                                                                                                                                         |
| <b>Poland</b>           | Yes | Ministry of Health Poland. Cervical cancer screening programme [Program profilaktyki raka szyjki macicy (cytologia)] ( <a href="https://www.gov.pl/">https://www.gov.pl/</a> )                                                                                                                                                                                                                                                                                                                                                                                                                                                                                                                                                                                                                                                                                                                                                                                                                                                                                                                                                                                                                                                                                                                                                                                                                                                                                                                                                                                                                                                                                                                                                                                                                                                                                                                                                                                                                                                                                                                                                                                                                                                                                                                                                                                                                                                                                                                                                                                                                                                                                                                                                                                                                                                                                                                                                                                                                                                                                                                                                                                                                                                                                                                                                                                                                                                                                                                                                                                                                                                                                                                                                                                                                                                                                                                                                                                                                                                                                                                                                                                                                                                                                                                                                                                                                                             |

|                            |     |                                                                                                                                                                                                                                                                                                                                                                                                                                                                                                                                                                                                                                                                                                                                                                                                                                                                                                                                                                                                                                                                                                                                                                                                                                                                                                                                                                                                                                                                                                                                                                                                                                                                                                                                                                                                                                                                                                                                                                                                                                                                                                                                                                                                                                                                                                                                                                                                                                                                                                                                                                                                                                                                                                                                                                                                                                                                                                                                                                                                                                                                                                                                                                                                                                                                                                                                                                                                                                                                                                                                                                                                        |
|----------------------------|-----|--------------------------------------------------------------------------------------------------------------------------------------------------------------------------------------------------------------------------------------------------------------------------------------------------------------------------------------------------------------------------------------------------------------------------------------------------------------------------------------------------------------------------------------------------------------------------------------------------------------------------------------------------------------------------------------------------------------------------------------------------------------------------------------------------------------------------------------------------------------------------------------------------------------------------------------------------------------------------------------------------------------------------------------------------------------------------------------------------------------------------------------------------------------------------------------------------------------------------------------------------------------------------------------------------------------------------------------------------------------------------------------------------------------------------------------------------------------------------------------------------------------------------------------------------------------------------------------------------------------------------------------------------------------------------------------------------------------------------------------------------------------------------------------------------------------------------------------------------------------------------------------------------------------------------------------------------------------------------------------------------------------------------------------------------------------------------------------------------------------------------------------------------------------------------------------------------------------------------------------------------------------------------------------------------------------------------------------------------------------------------------------------------------------------------------------------------------------------------------------------------------------------------------------------------------------------------------------------------------------------------------------------------------------------------------------------------------------------------------------------------------------------------------------------------------------------------------------------------------------------------------------------------------------------------------------------------------------------------------------------------------------------------------------------------------------------------------------------------------------------------------------------------------------------------------------------------------------------------------------------------------------------------------------------------------------------------------------------------------------------------------------------------------------------------------------------------------------------------------------------------------------------------------------------------------------------------------------------------------|
| <b>Portugal</b>            | Yes | Personal communication WHO country consultation (*)<br>National Health Service, Portugal. Regional Health Administration of Lisbon and Valley de Tejo. Cervical cancer screening ( <a href="https://www.arslvt.min-saude.pt/pages/1">https://www.arslvt.min-saude.pt/pages/1</a> )<br>National Health Service (SNS), Portugal. National Programme for oncological diseases. Report 2014. Evaluation and Monitoring of Population-Based Organized Cancer Screenings in Mainland Portugal ( <a href="https://www.sns.gov.pt/?cpp=1">https://www.sns.gov.pt/?cpp=1</a> )<br>Regional Health Secretariat. Autonomous Region of the Azores. Regional Health Plan 2014-2016 - Extension 2020. 2015: 1-292.                                                                                                                                                                                                                                                                                                                                                                                                                                                                                                                                                                                                                                                                                                                                                                                                                                                                                                                                                                                                                                                                                                                                                                                                                                                                                                                                                                                                                                                                                                                                                                                                                                                                                                                                                                                                                                                                                                                                                                                                                                                                                                                                                                                                                                                                                                                                                                                                                                                                                                                                                                                                                                                                                                                                                                                                                                                                                                   |
| <b>Republic of Moldova</b> | Yes | UNFPA-Moldova. Cervical Cancer Prevention in the Republic of Moldova [Proiectul "Prevenirea Cancerului de Col Uterin în Republica Moldova"] ( <a href="https://moldova.unfpa.org/ro">https://moldova.unfpa.org/ro</a> )                                                                                                                                                                                                                                                                                                                                                                                                                                                                                                                                                                                                                                                                                                                                                                                                                                                                                                                                                                                                                                                                                                                                                                                                                                                                                                                                                                                                                                                                                                                                                                                                                                                                                                                                                                                                                                                                                                                                                                                                                                                                                                                                                                                                                                                                                                                                                                                                                                                                                                                                                                                                                                                                                                                                                                                                                                                                                                                                                                                                                                                                                                                                                                                                                                                                                                                                                                                |
| <b>Romania</b>             | Yes | National Institute of Public Health. Cervical cancer screening [programul de screening pentru cancerul de col uterin] ( <a href="https://insp.gov.ro/">https://insp.gov.ro/</a> )<br>Institutul Oncologic Prof. Dr.I. Chiricuta. Cluj-Napoca. Romania. National Cervical Cancer Screening Programme ( <a href="http://www.ioen.ro/">http://www.ioen.ro/</a> )                                                                                                                                                                                                                                                                                                                                                                                                                                                                                                                                                                                                                                                                                                                                                                                                                                                                                                                                                                                                                                                                                                                                                                                                                                                                                                                                                                                                                                                                                                                                                                                                                                                                                                                                                                                                                                                                                                                                                                                                                                                                                                                                                                                                                                                                                                                                                                                                                                                                                                                                                                                                                                                                                                                                                                                                                                                                                                                                                                                                                                                                                                                                                                                                                                          |
| <b>Russian Federation</b>  | Yes | Order of the Ministry of Health of the Russian Federation of 13 March 2019 N9 124n <<06 approval of the procedure for conducting preventive medical examination and the clinical examination of certain groups of the adult population>>                                                                                                                                                                                                                                                                                                                                                                                                                                                                                                                                                                                                                                                                                                                                                                                                                                                                                                                                                                                                                                                                                                                                                                                                                                                                                                                                                                                                                                                                                                                                                                                                                                                                                                                                                                                                                                                                                                                                                                                                                                                                                                                                                                                                                                                                                                                                                                                                                                                                                                                                                                                                                                                                                                                                                                                                                                                                                                                                                                                                                                                                                                                                                                                                                                                                                                                                                               |
| <b>San Marino</b>          | Yes | Istituto per la Sicurezza Sociale. Screening prevenzione ( <a href="http://www.iss.sm">http://www.iss.sm</a> )                                                                                                                                                                                                                                                                                                                                                                                                                                                                                                                                                                                                                                                                                                                                                                                                                                                                                                                                                                                                                                                                                                                                                                                                                                                                                                                                                                                                                                                                                                                                                                                                                                                                                                                                                                                                                                                                                                                                                                                                                                                                                                                                                                                                                                                                                                                                                                                                                                                                                                                                                                                                                                                                                                                                                                                                                                                                                                                                                                                                                                                                                                                                                                                                                                                                                                                                                                                                                                                                                         |
| <b>Serbia</b>              | Yes | Serbian Public Health Institute. Cervical cancer programme ( <a href="http://www.skriningsrbija.rs/">http://www.skriningsrbija.rs/</a> )                                                                                                                                                                                                                                                                                                                                                                                                                                                                                                                                                                                                                                                                                                                                                                                                                                                                                                                                                                                                                                                                                                                                                                                                                                                                                                                                                                                                                                                                                                                                                                                                                                                                                                                                                                                                                                                                                                                                                                                                                                                                                                                                                                                                                                                                                                                                                                                                                                                                                                                                                                                                                                                                                                                                                                                                                                                                                                                                                                                                                                                                                                                                                                                                                                                                                                                                                                                                                                                               |
| <b>Slovakia</b>            | Yes | Ministry of Health of the Slovak Republic. Press December 13th, 2018: Screenings will start in January ( <a href="https://www.health.gov.sk/Titulka">https://www.health.gov.sk/Titulka</a> )                                                                                                                                                                                                                                                                                                                                                                                                                                                                                                                                                                                                                                                                                                                                                                                                                                                                                                                                                                                                                                                                                                                                                                                                                                                                                                                                                                                                                                                                                                                                                                                                                                                                                                                                                                                                                                                                                                                                                                                                                                                                                                                                                                                                                                                                                                                                                                                                                                                                                                                                                                                                                                                                                                                                                                                                                                                                                                                                                                                                                                                                                                                                                                                                                                                                                                                                                                                                           |
| <b>Slovenia</b>            | Yes | Institute of Oncology Ljubljana. Slovenia Cervical Cancer Screening Programme ZORA ( <a href="https://zora.onko-i.si/">https://zora.onko-i.si/</a> )                                                                                                                                                                                                                                                                                                                                                                                                                                                                                                                                                                                                                                                                                                                                                                                                                                                                                                                                                                                                                                                                                                                                                                                                                                                                                                                                                                                                                                                                                                                                                                                                                                                                                                                                                                                                                                                                                                                                                                                                                                                                                                                                                                                                                                                                                                                                                                                                                                                                                                                                                                                                                                                                                                                                                                                                                                                                                                                                                                                                                                                                                                                                                                                                                                                                                                                                                                                                                                                   |
| <b>Spain</b>               | Yes | Servicio Andaluz de Salud. Proceso asistencial integrado cáncer de cérvix. ( <a href="https://www.sspa.juntadeandalucia.es">https://www.sspa.juntadeandalucia.es</a> )<br>Gobierno de Aragón. Recomendaciones para el desarrollo del programa de cribado de cáncer de cérvix en Aragón. ( <a href="https://www.aragon.es/">https://www.aragon.es/</a> )<br>AsturSalud. Programa de Salud del Principado de Asturias. ( <a href="https://www.astursalud.es/astursalud">https://www.astursalud.es/astursalud</a> )<br>Ib-salut Servei de Salut de les Illes Balears. Programa de prevención del cancer de cervix. ( <a href="https://www.ibsalut.es/">https://www.ibsalut.es/</a> )<br>Servicio canario de la salud. Cribado oportunisto del cáncer de cérvix. Recomendaciones clínico asistenciales. 2013. ( <a href="https://www3.gobiernodecanarias.org/">https://www3.gobiernodecanarias.org/</a> )<br>Gobierno de Cantabria. Protocolo de detección precoz de cáncer de cérvix. 2015. ( <a href="https://saludcantabria.es/">https://saludcantabria.es/</a> )<br>Sanidad Castilla la Mancha. Sescam. Programa de Detección Precoz de Cáncer de Cérvix ( <a href="https://sanidad.castillalamancha.es">https://sanidad.castillalamancha.es</a> )<br>Junta de Castilla y León. Programa de prevención y detección precoz de cáncer de cuello de útero en Castilla y León. ( <a href="https://www.saludcastillayleon.es/">https://www.saludcastillayleon.es/</a> )<br>Generalitat de catalunya. Programa de detecció precoç de càncer de coll d'úter. ( <a href="https://canalsalut.gencat.cat/ca/inici">https://canalsalut.gencat.cat/ca/inici</a> )<br>Generalitat Valenciana. Estrategia contra el cáncer de la Comunidad Valenciana 2019-2022 ( <a href="http://www2.san.gva.es/">http://www2.san.gva.es/</a> )<br>Generalitat Valenciana. Informes de Salud. Detección precoz de cáncer de cervix N°93. 2006 ( <a href="http://www2.san.gva.es/">http://www2.san.gva.es/</a> )<br>Generalitat Valenciana. Sanidad elabora un nuevo protocolo de detección precoz de cáncer de útero que amplía la población diana a las mujeres de 20 a 65 años. Valencia (21-3-04). ( <a href="http://www2.san.gva.es/">http://www2.san.gva.es/</a> )<br>Junta de Extremadura. Plan Integral contra el cáncer en Extremadura 2017-2021 ( <a href="https://saludextremadura.ses.es/">https://saludextremadura.ses.es/</a> )<br>Servizo Galego de Saúde. Guía Técnica do proceso de detección precoz de cancro de cervix. Versión 2 Xullo 2013. ( <a href="https://www.sergas.es/">https://www.sergas.es/</a> )<br>Gobierno de La Rioja. Nuevo programa de detección precoz de cáncer de cérvix. ( <a href="http://www.riojasalud.es/">http://www.riojasalud.es/</a> )<br>Presupuestos Generales de la Comunidad de Madrid 2019. ( <a href="http://www.madrid.org/">http://www.madrid.org/</a> )<br>Region de Murcia. Consejería de Sanidad y política social. Programa Integral de Atención a la Mujer (PIAM) Región de Murcia. 2012. ( <a href="https://www.murciasalud.es/principal.php">https://www.murciasalud.es/principal.php</a> )<br>Gobierno de Navarra. Prevención del Cancer de Cuello de Utero. ( <a href="https://www.navarra.es">https://www.navarra.es</a> )<br>Gobierno Vasco. Programa de cribado de cáncer de cérvix. ( <a href="https://www.osakidetza.euskadi.eus/">https://www.osakidetza.euskadi.eus/</a> )<br>Guidelines for cervical cancer screening in Spain, 2014 ( <a href="http://www.aepcc.org/">http://www.aepcc.org/</a> )<br>Personal communication WHO country consultation (*) |
| <b>Sweden</b>              | Yes | Regionala Cancercentrum i Samverkan. Nationellt vårdprogram för livmoderhalscancerprevention [National Cervical Cancer Prevention Programme] ( <a href="https://cancercentrum.se/samverkan/">https://cancercentrum.se/samverkan/</a> )                                                                                                                                                                                                                                                                                                                                                                                                                                                                                                                                                                                                                                                                                                                                                                                                                                                                                                                                                                                                                                                                                                                                                                                                                                                                                                                                                                                                                                                                                                                                                                                                                                                                                                                                                                                                                                                                                                                                                                                                                                                                                                                                                                                                                                                                                                                                                                                                                                                                                                                                                                                                                                                                                                                                                                                                                                                                                                                                                                                                                                                                                                                                                                                                                                                                                                                                                                 |
| <b>Switzerland</b>         | Yes | Société Suisse de Gynecologie et Obstetrique. Recommandations pour la prévention du cancer du col de l'utérus. ( <a href="https://www.sggg.ch/">https://www.sggg.ch/</a> )                                                                                                                                                                                                                                                                                                                                                                                                                                                                                                                                                                                                                                                                                                                                                                                                                                                                                                                                                                                                                                                                                                                                                                                                                                                                                                                                                                                                                                                                                                                                                                                                                                                                                                                                                                                                                                                                                                                                                                                                                                                                                                                                                                                                                                                                                                                                                                                                                                                                                                                                                                                                                                                                                                                                                                                                                                                                                                                                                                                                                                                                                                                                                                                                                                                                                                                                                                                                                             |
| <b>Ukraine</b>             | Yes | Order of the Ministry of Health of Ukraine of April 2nd, 2014 No. 236. On the approval of the introduction of medical-technological documents on the standardization of medical procedures related to dysplasia and cervical cancer [Про затвердження та впровадження медико-технологічних документів зі стандартизації медичної допомоги при дисплазії та раку шийки матки].                                                                                                                                                                                                                                                                                                                                                                                                                                                                                                                                                                                                                                                                                                                                                                                                                                                                                                                                                                                                                                                                                                                                                                                                                                                                                                                                                                                                                                                                                                                                                                                                                                                                                                                                                                                                                                                                                                                                                                                                                                                                                                                                                                                                                                                                                                                                                                                                                                                                                                                                                                                                                                                                                                                                                                                                                                                                                                                                                                                                                                                                                                                                                                                                                          |

|                                 |     |                                                                                                                                                                                                                                                                                                                                                                                                                                                                                                                                                                                                        |
|---------------------------------|-----|--------------------------------------------------------------------------------------------------------------------------------------------------------------------------------------------------------------------------------------------------------------------------------------------------------------------------------------------------------------------------------------------------------------------------------------------------------------------------------------------------------------------------------------------------------------------------------------------------------|
| <b>United Kingdom</b>           | Yes | Government United Kingdom. NHS cervical screening (CSP) programme ( <a href="https://www.gov.uk/">https://www.gov.uk/</a> )<br>Public Health Agency, Northern Ireland. Cervical cancer screening ( <a href="https://www.publichealth.hscni.net/">https://www.publichealth.hscni.net/</a> )<br>Public Health Scotland. Cervical screening ( <a href="http://www.healthscotland.scot/">http://www.healthscotland.scot/</a> )<br>Public Health Agency. Cervical screening Wales ( <a href="http://www.cervicalscreeningwales.wales.nhs.uk/home">http://www.cervicalscreeningwales.wales.nhs.uk/home</a> ) |
| <b>AFRICA</b>                   |     |                                                                                                                                                                                                                                                                                                                                                                                                                                                                                                                                                                                                        |
| <b>Algeria</b>                  | Yes | Yazghich I, et al. Cervical cancer in the Maghreb country (Morocco - Algeria - Tunisia) : epidemiological, clinical profile and control policy. <i>Tunis Med.</i> 2018 Oct-Nov;96(10-11):647-657.                                                                                                                                                                                                                                                                                                                                                                                                      |
| <b>Angola</b>                   | No  |                                                                                                                                                                                                                                                                                                                                                                                                                                                                                                                                                                                                        |
| <b>Benin</b>                    | No  |                                                                                                                                                                                                                                                                                                                                                                                                                                                                                                                                                                                                        |
| <b>Botswana</b>                 | No  |                                                                                                                                                                                                                                                                                                                                                                                                                                                                                                                                                                                                        |
| <b>Burkina Faso</b>             | Yes | WHO Country Capacity Survey 2019. WHO Global Health Observatory ( <a href="https://www.who.int/data/gho">https://www.who.int/data/gho</a> )                                                                                                                                                                                                                                                                                                                                                                                                                                                            |
| <b>Burundi</b>                  | No  |                                                                                                                                                                                                                                                                                                                                                                                                                                                                                                                                                                                                        |
| <b>Cameroon</b>                 | No  |                                                                                                                                                                                                                                                                                                                                                                                                                                                                                                                                                                                                        |
| <b>Cape Verde</b>               | No  |                                                                                                                                                                                                                                                                                                                                                                                                                                                                                                                                                                                                        |
| <b>Central African Republic</b> | No  |                                                                                                                                                                                                                                                                                                                                                                                                                                                                                                                                                                                                        |
| <b>Chad</b>                     | No  |                                                                                                                                                                                                                                                                                                                                                                                                                                                                                                                                                                                                        |
| <b>Comoros</b>                  | No  |                                                                                                                                                                                                                                                                                                                                                                                                                                                                                                                                                                                                        |
| <b>Congo</b>                    | No  |                                                                                                                                                                                                                                                                                                                                                                                                                                                                                                                                                                                                        |
| <b>Côte d'Ivoire</b>            | Yes | Boni S, et al. Assessment of the scale-up of cervical cancer screening in Abidjan stratified by HIV status. <i>Int J Gynaecol Obstet.</i> 2019;147(2):246-251.                                                                                                                                                                                                                                                                                                                                                                                                                                         |
| <b>Djibouti</b>                 | No  |                                                                                                                                                                                                                                                                                                                                                                                                                                                                                                                                                                                                        |
| <b>DR Congo</b>                 |     |                                                                                                                                                                                                                                                                                                                                                                                                                                                                                                                                                                                                        |
| <b>Egypt</b>                    | No  |                                                                                                                                                                                                                                                                                                                                                                                                                                                                                                                                                                                                        |
| <b>Equatorial Guinea</b>        | No  |                                                                                                                                                                                                                                                                                                                                                                                                                                                                                                                                                                                                        |
| <b>Eritrea</b>                  | No  |                                                                                                                                                                                                                                                                                                                                                                                                                                                                                                                                                                                                        |
| <b>Eswatini</b>                 | No  |                                                                                                                                                                                                                                                                                                                                                                                                                                                                                                                                                                                                        |
| <b>Ethiopia</b>                 | Yes | Guideline for Cervical Cancer Prevention and Control in Ethiopia ( <a href="https://www.iccp-portal.org/">https://www.iccp-portal.org/</a> )                                                                                                                                                                                                                                                                                                                                                                                                                                                           |
| <b>Gabon</b>                    | Yes | Ministère de la Santé & Fondation Sylvia Bongo Ondimba. Guide de bonnes pratiques: Detection precoce des cancers du sein et du col uterin. ( <a href="http://www.sylviabongoondimba.org">http://www.sylviabongoondimba.org</a> )                                                                                                                                                                                                                                                                                                                                                                       |
| <b>Gambia</b>                   | No  |                                                                                                                                                                                                                                                                                                                                                                                                                                                                                                                                                                                                        |
| <b>Ghana</b>                    | No  |                                                                                                                                                                                                                                                                                                                                                                                                                                                                                                                                                                                                        |
| <b>Guinea</b>                   | Yes | WHO Country Capacity Survey 2019. WHO Global Health Observatory ( <a href="https://www.who.int/data/gho">https://www.who.int/data/gho</a> )                                                                                                                                                                                                                                                                                                                                                                                                                                                            |
| <b>Guinea-Bissau</b>            | No  |                                                                                                                                                                                                                                                                                                                                                                                                                                                                                                                                                                                                        |
| <b>Kenya</b>                    | Yes | Ministry of Health, Kenya. Kenya National Cancer Screening Guidelines Nairobi, November 2018 ( <a href="https://www.health.go.ke/">https://www.health.go.ke/</a> )                                                                                                                                                                                                                                                                                                                                                                                                                                     |
| <b>Lesotho</b>                  | No  |                                                                                                                                                                                                                                                                                                                                                                                                                                                                                                                                                                                                        |
| <b>Liberia</b>                  | No  |                                                                                                                                                                                                                                                                                                                                                                                                                                                                                                                                                                                                        |
| <b>Libya</b>                    | No  |                                                                                                                                                                                                                                                                                                                                                                                                                                                                                                                                                                                                        |
| <b>Madagascar</b>               | Yes | WHO Country Capacity Survey 2019. WHO Global Health Observatory ( <a href="https://www.who.int/data/gho">https://www.who.int/data/gho</a> )                                                                                                                                                                                                                                                                                                                                                                                                                                                            |
| <b>Malawi</b>                   | Yes | Ministry of Health. The government of Malawi. National Reproductive Health service delivery Guidelines 2014-2019                                                                                                                                                                                                                                                                                                                                                                                                                                                                                       |
| <b>Mali</b>                     | No  |                                                                                                                                                                                                                                                                                                                                                                                                                                                                                                                                                                                                        |

|                                |     |                                                                                                                                                                                                                                                                                                                                                                                                                                                                                                                                           |
|--------------------------------|-----|-------------------------------------------------------------------------------------------------------------------------------------------------------------------------------------------------------------------------------------------------------------------------------------------------------------------------------------------------------------------------------------------------------------------------------------------------------------------------------------------------------------------------------------------|
| <b>Mauritania</b>              | No  |                                                                                                                                                                                                                                                                                                                                                                                                                                                                                                                                           |
| <b>Mauritius</b>               | Yes | Personal communication WHO country consultation (*)                                                                                                                                                                                                                                                                                                                                                                                                                                                                                       |
| <b>Morocco</b>                 | Yes | Association Lalla Salma de lutte contre le Cancer. Guide de détection précoce des cancers du sein et du col de l'utérus ( <a href="https://www.contrelecancer.ma/fr/">https://www.contrelecancer.ma/fr/</a> )                                                                                                                                                                                                                                                                                                                             |
| <b>Mozambique</b>              | Yes | Brandão M, et al. Cervical cancer screening uptake in women aged between 15 and 64 years in Mozambique. <i>Eur J Cancer Prev.</i> 2019 Jul;28(4):338-343.                                                                                                                                                                                                                                                                                                                                                                                 |
| <b>Namibia</b>                 | No  |                                                                                                                                                                                                                                                                                                                                                                                                                                                                                                                                           |
| <b>Niger</b>                   | No  |                                                                                                                                                                                                                                                                                                                                                                                                                                                                                                                                           |
| <b>Nigeria</b>                 | No  |                                                                                                                                                                                                                                                                                                                                                                                                                                                                                                                                           |
| <b>Rwanda</b>                  | Yes | Binagwaho A, et al. Integration of comprehensive women's health programmes into health systems: cervical cancer prevention, care and control in Rwanda. <i>Bull World Health Organ.</i> 2013 Sep 1; 91(9): 697–703.                                                                                                                                                                                                                                                                                                                       |
| <b>Sao Tome &amp; Principe</b> | No  |                                                                                                                                                                                                                                                                                                                                                                                                                                                                                                                                           |
| <b>Senegal</b>                 | Yes | République du Sénégal. Normes et protocoles de dépistage des lésions précancéreuses du col de l'utérus et de détection précoce du cancer du sein. Document validé en décembre 2018( <a href="https://www.iccp-portal.org/">https://www.iccp-portal.org/</a> )                                                                                                                                                                                                                                                                             |
| <b>Seychelles</b>              | No  |                                                                                                                                                                                                                                                                                                                                                                                                                                                                                                                                           |
| <b>Sierra Leone</b>            | No  |                                                                                                                                                                                                                                                                                                                                                                                                                                                                                                                                           |
| <b>Somalia</b>                 | No  |                                                                                                                                                                                                                                                                                                                                                                                                                                                                                                                                           |
| <b>South Africa</b>            | Yes | Botha MH, et al. Guidelines for cervical cancer screening in South Africa. <i>Southern African Journal of Gynaecological Oncology</i> 2017; 9(1):8-12                                                                                                                                                                                                                                                                                                                                                                                     |
| <b>South Sudan</b>             | No  |                                                                                                                                                                                                                                                                                                                                                                                                                                                                                                                                           |
| <b>Sudan</b>                   | No  |                                                                                                                                                                                                                                                                                                                                                                                                                                                                                                                                           |
| <b>Tanzania</b>                | No  |                                                                                                                                                                                                                                                                                                                                                                                                                                                                                                                                           |
| <b>Togo</b>                    | No  |                                                                                                                                                                                                                                                                                                                                                                                                                                                                                                                                           |
| <b>Tunisia</b>                 | Yes | Ministere de la Sante. Republique Tunisiene. (2015) Plan pour le lutte contre le cancer en Tunisie 2015-2019. ( <a href="https://www.iccp-portal.org/">https://www.iccp-portal.org/</a> )<br>Hsairi M, et al. Health screening strategies in Maghreb countries: Situation Analysis and perspectives. <i>Tunis Med.</i> 2018 Oct-Nov;96(10-11):688-695.                                                                                                                                                                                    |
| <b>Uganda</b>                  | Yes | Personal communication WHO country consultation (*)                                                                                                                                                                                                                                                                                                                                                                                                                                                                                       |
| <b>Zambia</b>                  | Yes | Ministry of health. Republic of Zambia. National Cancer Control Strategic Plan 2016-2021( <a href="https://www.iccp-portal.org/">https://www.iccp-portal.org/</a> )<br>Ministry of Health. Center for Disease Control. Center for Infectious Disease Research in Zambia (CIDRZ). Cervical Cancer ( <a href="http://www.cidrz.org/">http://www.cidrz.org/</a> )<br>Nyambe A, et al. Knowledge, attitudes and practices of cervical cancer prevention among Zambian women and men. <i>BMC Public Health.</i> 2019 May 4;19(1):508.          |
| <b>Zimbabwe</b>                | No  |                                                                                                                                                                                                                                                                                                                                                                                                                                                                                                                                           |
| <b>AMERICA</b>                 |     |                                                                                                                                                                                                                                                                                                                                                                                                                                                                                                                                           |
| <b>Antigua &amp; Barbuda</b>   | Yes | Pan American Health Organization. Situational Analysis of Cervical Cancer Prevention and Control in the Caribbean. 2013 dic. ( <a href="https://www.paho.org/">https://www.paho.org/</a> )                                                                                                                                                                                                                                                                                                                                                |
| <b>Argentina</b>               | Yes | Arrossi S, et al. Prevención del cáncer cervicouterino. Recomendaciones para el tamizaje, seguimiento y tratamiento de mujeres en el marco de programas de tamizaje basados en el test de VPH: actualización. Instituto Nacional del Cáncer Argentina, 2015 ( <a href="https://repositorio.cedes.org/">https://repositorio.cedes.org/</a> )<br>Gobierno de Argentina, Instituto Nacional del Cáncer. Programa Nacional de Prevención de Cáncer Cervicouterino ( <a href="https://www.argentina.gob.ar">https://www.argentina.gob.ar</a> ) |
| <b>Bahamas</b>                 | Yes | National Health Insurance Authority. Bahamas Primary Care Benefits Package ( <a href="https://www.nhibahamas.gov.bs/">https://www.nhibahamas.gov.bs/</a> )<br>Bahamas Ministry of Health. Gynaecology Services ( <a href="http://www.bahamas.gov.bs">http://www.bahamas.gov.bs</a> )                                                                                                                                                                                                                                                      |
| <b>Barbados</b>                | No  | Luciani S, et al. Cancer Prevention and Control in the Caribbean. <i>Cancer Control.</i> 2017;53–61.                                                                                                                                                                                                                                                                                                                                                                                                                                      |
| <b>Belize</b>                  | Yes | Ministry of Health. Cervical Cancer Clinical Guidelines Belize; 2016 ( <a href="https://www.iccp-portal.org/">https://www.iccp-portal.org/</a> )                                                                                                                                                                                                                                                                                                                                                                                          |
| <b>Bermuda</b>                 | Yes | Bermuda Cancer and Health Centre. Bermuda's Cancer Screening Guidelines ( <a href="https://www.cancer.bm">https://www.cancer.bm</a> )                                                                                                                                                                                                                                                                                                                                                                                                     |
| <b>Bolivia</b>                 | Yes | Dirección General de Salud, Unidad de Servicios de Salud y Calidad. Norma Nacional, Reglas, Protocolos y Procedimientos para la Detección y Control de Cáncer de Cuello Uterino. Cuarta edición actualizada ( <a href="https://www.minsalud.gob.bo">https://www.minsalud.gob.bo</a> )                                                                                                                                                                                                                                                     |

|                           |     |                                                                                                                                                                                                                                                                                                                                                                                                                                                                                                                                                                                                                                                                                                                                                                                                                                                                                                                                                                                                                                                                                                                                                                                                                                                                                                                                                                                                                                                                                                                                                                                                                                                                                                                                                                                                                                                                                                                                                                                                                                                                                                                                                                                                                                                                                                                                                                                                    |
|---------------------------|-----|----------------------------------------------------------------------------------------------------------------------------------------------------------------------------------------------------------------------------------------------------------------------------------------------------------------------------------------------------------------------------------------------------------------------------------------------------------------------------------------------------------------------------------------------------------------------------------------------------------------------------------------------------------------------------------------------------------------------------------------------------------------------------------------------------------------------------------------------------------------------------------------------------------------------------------------------------------------------------------------------------------------------------------------------------------------------------------------------------------------------------------------------------------------------------------------------------------------------------------------------------------------------------------------------------------------------------------------------------------------------------------------------------------------------------------------------------------------------------------------------------------------------------------------------------------------------------------------------------------------------------------------------------------------------------------------------------------------------------------------------------------------------------------------------------------------------------------------------------------------------------------------------------------------------------------------------------------------------------------------------------------------------------------------------------------------------------------------------------------------------------------------------------------------------------------------------------------------------------------------------------------------------------------------------------------------------------------------------------------------------------------------------------|
| <b>Brazil</b>             | Yes | Instituto Nacional de Câncer, Ministerio da Saúde. Diretrizes Brasileiras para o Rastreamento do Câncer do Colo do Útero, 2016 ( <a href="https://www.inca.gov.br/">https://www.inca.gov.br/</a> )                                                                                                                                                                                                                                                                                                                                                                                                                                                                                                                                                                                                                                                                                                                                                                                                                                                                                                                                                                                                                                                                                                                                                                                                                                                                                                                                                                                                                                                                                                                                                                                                                                                                                                                                                                                                                                                                                                                                                                                                                                                                                                                                                                                                 |
| <b>Canada</b>             | Yes | Cervical Cancer Screening in Canada: Environmental Scan. 2018. ( <a href="https://www.partnershipagainstcancer.ca/">https://www.partnershipagainstcancer.ca/</a> )<br>Alberta Health Services. Alberta Cervical Cancer Screening Programme ( <a href="https://www.albertahealthservices.ca">https://www.albertahealthservices.ca</a> )<br>Screening for Life.ca ( <a href="http://screeningforlife.ca/">http://screeningforlife.ca/</a> )<br>Provincial Health Service Authority, British Columbia. BC Cancer Screening ( <a href="http://www.bccancer.bc.ca/screening/">http://www.bccancer.bc.ca/screening/</a> )<br>CancerCare Manitoba. CervixCheck ( <a href="https://www.cancercare.mb.ca/home/">https://www.cancercare.mb.ca/home/</a> )<br>New Brunswick Department of Health, Cancer Network. New Brunswick Cervical Cancer Prevention and Screening Programme ( <a href="https://www2.gnb.ca/content/gnb/en.html">https://www2.gnb.ca/content/gnb/en.html</a> )<br>Cancer Care Programme, Eastern Health. Cervical Screening Initiatives Programme ( <a href="http://cancercare.easternhealth.ca/">http://cancercare.easternhealth.ca/</a> )<br>Cancer Care Nova Scotia, Nova Scotia Health Authority Programme of Care for Cancer. Cervical Cancer Prevention Programme. Cancer screening programmes ( <a href="https://cancercare.easternhealth.ca/">https://cancercare.easternhealth.ca/</a> )<br>Government of Northwest Territories. Let's Talk about Cancer. Cervical Cancer Screening ( <a href="https://www.cancernwt.ca/">https://www.cancernwt.ca/</a> )<br>Cancer Care Ontario. Ontario Cervical Screening Programme ( <a href="https://www.cancercareontario.ca/">https://www.cancercareontario.ca/</a> )<br>Health Prince Edward Island. Cervical Cancer Screening Service ( <a href="https://www.princeedwardisland.ca/en">https://www.princeedwardisland.ca/en</a> )<br>Institut National de Santé Publique du Quebec. Guidelines on Cervical Cancer Screening in Québec. 2011 ( <a href="https://www.inspq.qc.ca/">https://www.inspq.qc.ca/</a> )<br>Saskatchewan Cancer Agency. Screening Programme for Cervical Cancer ( <a href="http://www.saskcancer.ca/">http://www.saskcancer.ca/</a> )<br>Canadian Task Force on Preventive Health Care. Cervical Cancer Screening Guidelines 2013 ( <a href="https://canadiantaskforce.ca/">https://canadiantaskforce.ca/</a> ) |
| <b>Chile</b>              | Yes | Ministerio de Salud, Gobierno de Chile. Guías Clínicas AUGE, Cáncer Cérvico Uterino, 2015 ( <a href="https://www.minsal.cl/">https://www.minsal.cl/</a> )                                                                                                                                                                                                                                                                                                                                                                                                                                                                                                                                                                                                                                                                                                                                                                                                                                                                                                                                                                                                                                                                                                                                                                                                                                                                                                                                                                                                                                                                                                                                                                                                                                                                                                                                                                                                                                                                                                                                                                                                                                                                                                                                                                                                                                          |
| <b>Colombia</b>           | Yes | República de Colombia, Ministerio de Salud y Protección Social. Resolución 3280 de 2018 ( <a href="https://www.minsalud.gov.co">https://www.minsalud.gov.co</a> )<br>República de Colombia, Ministerio de Salud y Protección Social. Resolución 276 de 2019 ( <a href="https://www.minsalud.gov.co">https://www.minsalud.gov.co</a> )                                                                                                                                                                                                                                                                                                                                                                                                                                                                                                                                                                                                                                                                                                                                                                                                                                                                                                                                                                                                                                                                                                                                                                                                                                                                                                                                                                                                                                                                                                                                                                                                                                                                                                                                                                                                                                                                                                                                                                                                                                                              |
| <b>Costa Rica</b>         | Yes | Presidencia de la República. Ministerio de Salud. DECRETOS No 33119-S: Normas y Procedimientos de Atención Integral a la Mujer para la Prevención y Manejo del Cáncer de Cuello de Útero, para el I y II Nivel de Atención y Normas de Laboratorios de Citología. La Gaceta 131; 2006: 1–24 ( <a href="https://www.imprentanacional.go.cr">https://www.imprentanacional.go.cr</a> )<br>Presidencia de la República, Ministerio de Salud. DECRETO No 33650-S: Manual de Normas y procedimientos de Atención Integral a la Mujer para la Prevención y Manejo del Cáncer de Cuello de Útero, para el I y II Nivel de Atención y Normas de Laboratorios de Citología. Costa Rica, 2007 La Gaceta 171 ( <a href="https://extranet.who.int/ncdccs/Data/CRI_B5_COR_Poli%cc%81tica_CA_cuellouterino.pdf">https://extranet.who.int/ncdccs/Data/CRI_B5_COR_Poli%cc%81tica_CA_cuellouterino.pdf</a> )                                                                                                                                                                                                                                                                                                                                                                                                                                                                                                                                                                                                                                                                                                                                                                                                                                                                                                                                                                                                                                                                                                                                                                                                                                                                                                                                                                                                                                                                                                         |
| <b>Cuba</b>               | Yes | Ministerio de Salud Pública. Guía de cáncer cervicouterino. Acciones para su control. La Habana, Cuba, 2018 ( <a href="https://especialidades.sld.cu/">https://especialidades.sld.cu/</a> )                                                                                                                                                                                                                                                                                                                                                                                                                                                                                                                                                                                                                                                                                                                                                                                                                                                                                                                                                                                                                                                                                                                                                                                                                                                                                                                                                                                                                                                                                                                                                                                                                                                                                                                                                                                                                                                                                                                                                                                                                                                                                                                                                                                                        |
| <b>Dominica</b>           | Yes | Pan American Health Organization. Situational Analysis of Cervical Cancer Prevention and Control in the Caribbean. 2013 dic. ( <a href="https://www.paho.org/">https://www.paho.org/</a> )<br>Luciani S, et al. Cancer Prevention and Control in the Caribbean. Cancer Control. 2017;53–61.                                                                                                                                                                                                                                                                                                                                                                                                                                                                                                                                                                                                                                                                                                                                                                                                                                                                                                                                                                                                                                                                                                                                                                                                                                                                                                                                                                                                                                                                                                                                                                                                                                                                                                                                                                                                                                                                                                                                                                                                                                                                                                        |
| <b>Dominican Republic</b> | Yes | Secretaría de Estado de Salud Pública y Asistencia Social. Guías Para el Manejo de las Neoplasias de Cérvix. [Internet]. Santo Domingo, República Dominicana; 2010 ( <a href="https://extranet.who.int/ncdccs/Data/DOM_D1_Gu%C3%ADa%20Manejo%20de%20la%20Neoplasias.pdf">https://extranet.who.int/ncdccs/Data/DOM_D1_Gu%C3%ADa%20Manejo%20de%20la%20Neoplasias.pdf</a> )                                                                                                                                                                                                                                                                                                                                                                                                                                                                                                                                                                                                                                                                                                                                                                                                                                                                                                                                                                                                                                                                                                                                                                                                                                                                                                                                                                                                                                                                                                                                                                                                                                                                                                                                                                                                                                                                                                                                                                                                                           |
| <b>Ecuador</b>            |     | Ministerio de Salud Pública. Estrategia Nacional para la Atención Integral del Cáncer en el Ecuador, 2017 ( <a href="https://www.salud.gob.ec/">https://www.salud.gob.ec/</a> )                                                                                                                                                                                                                                                                                                                                                                                                                                                                                                                                                                                                                                                                                                                                                                                                                                                                                                                                                                                                                                                                                                                                                                                                                                                                                                                                                                                                                                                                                                                                                                                                                                                                                                                                                                                                                                                                                                                                                                                                                                                                                                                                                                                                                    |
| <b>El Salvador</b>        | Yes | Gobierno de El Salvador., Ministerio de Salud. Lineamientos técnicos para la prevención y control del cáncer cérvico uterino y de mama 2015 ( <a href="http://www.salud.gob.sv/">http://www.salud.gob.sv/</a> )                                                                                                                                                                                                                                                                                                                                                                                                                                                                                                                                                                                                                                                                                                                                                                                                                                                                                                                                                                                                                                                                                                                                                                                                                                                                                                                                                                                                                                                                                                                                                                                                                                                                                                                                                                                                                                                                                                                                                                                                                                                                                                                                                                                    |
| <b>Greenland</b>          | Yes | Holst S, et al. Cervical cancer screening in Greenland, 1997–2011: Screening coverage and trends in the incidence of high-grade cervical lesions. Gynecol Oncol. 2016 Nov;143(2):307–312.                                                                                                                                                                                                                                                                                                                                                                                                                                                                                                                                                                                                                                                                                                                                                                                                                                                                                                                                                                                                                                                                                                                                                                                                                                                                                                                                                                                                                                                                                                                                                                                                                                                                                                                                                                                                                                                                                                                                                                                                                                                                                                                                                                                                          |
| <b>Grenada</b>            | Yes | Pan American Health Organization. Situational Analysis of Cervical Cancer Prevention and Control in the Caribbean 2013 dic ( <a href="https://www.paho.org/">https://www.paho.org/</a> )<br>Luciani S,et al. Cancer Prevention and Control in the Caribbean. Cancer Control. 2017;53–61.                                                                                                                                                                                                                                                                                                                                                                                                                                                                                                                                                                                                                                                                                                                                                                                                                                                                                                                                                                                                                                                                                                                                                                                                                                                                                                                                                                                                                                                                                                                                                                                                                                                                                                                                                                                                                                                                                                                                                                                                                                                                                                           |
| <b>Guatemala</b>          | Yes | Ministerio de Salud Pública y Asistencia Social. Gobierno de Guatemala. Guía de atención Integral para la prevención, detección y tratamiento de lesiones precursoras del Cáncer Cérvico Uterino. Guatemala 2020. ( <a href="https://www.isdmguatemala.org/">https://www.isdmguatemala.org/</a> )                                                                                                                                                                                                                                                                                                                                                                                                                                                                                                                                                                                                                                                                                                                                                                                                                                                                                                                                                                                                                                                                                                                                                                                                                                                                                                                                                                                                                                                                                                                                                                                                                                                                                                                                                                                                                                                                                                                                                                                                                                                                                                  |
| <b>Guyana</b>             | Yes | Ministry of Health. Guyana Strategic Plan for the Integrated Prevention and Control of Chronic Non-communicable diseases and their risk factors 2013–2020 ( <a href="https://www.paho.org/">https://www.paho.org/</a> )<br>Biblioteca Médica Nacional. Guyana Cervical Cancer prevention ( <a href="https://www.mchip.net/">https://www.mchip.net/</a> )                                                                                                                                                                                                                                                                                                                                                                                                                                                                                                                                                                                                                                                                                                                                                                                                                                                                                                                                                                                                                                                                                                                                                                                                                                                                                                                                                                                                                                                                                                                                                                                                                                                                                                                                                                                                                                                                                                                                                                                                                                           |
| <b>Haiti</b>              | Yes | WHO Country Capacity Survey 2019. WHO Global Health Observatory ( <a href="https://www.who.int/data/gho">https://www.who.int/data/gho</a> )                                                                                                                                                                                                                                                                                                                                                                                                                                                                                                                                                                                                                                                                                                                                                                                                                                                                                                                                                                                                                                                                                                                                                                                                                                                                                                                                                                                                                                                                                                                                                                                                                                                                                                                                                                                                                                                                                                                                                                                                                                                                                                                                                                                                                                                        |
| <b>Honduras</b>           | Yes | Gobierno de la República de Honduras, Secretaría de Salud. Protocolo para el tamizaje y tratamiento de lesiones premalignas para la prevención del cáncer cervicouterino, 2015 ( <a href="https://www.iccp-portal.org/">https://www.iccp-portal.org/</a> )                                                                                                                                                                                                                                                                                                                                                                                                                                                                                                                                                                                                                                                                                                                                                                                                                                                                                                                                                                                                                                                                                                                                                                                                                                                                                                                                                                                                                                                                                                                                                                                                                                                                                                                                                                                                                                                                                                                                                                                                                                                                                                                                         |
| <b>Jamaica</b>            | Yes | Ministry of Health. National Guidelines for Cervical Cancer Prevention and Control Jamaica; 2011 ( <a href="https://extranet.who.int/ncdccs/Data/JAM_D1_JAM-Cervical-Cancer-guidelines.pdf">https://extranet.who.int/ncdccs/Data/JAM_D1_JAM-Cervical-Cancer-guidelines.pdf</a> )                                                                                                                                                                                                                                                                                                                                                                                                                                                                                                                                                                                                                                                                                                                                                                                                                                                                                                                                                                                                                                                                                                                                                                                                                                                                                                                                                                                                                                                                                                                                                                                                                                                                                                                                                                                                                                                                                                                                                                                                                                                                                                                   |

|                                        |     |                                                                                                                                                                                                                                                                                                                                                                                                                                                                                                                                                                                                                                                                                                               |
|----------------------------------------|-----|---------------------------------------------------------------------------------------------------------------------------------------------------------------------------------------------------------------------------------------------------------------------------------------------------------------------------------------------------------------------------------------------------------------------------------------------------------------------------------------------------------------------------------------------------------------------------------------------------------------------------------------------------------------------------------------------------------------|
| <b>Mexico</b>                          | Yes | Gobierno de México. Programa prevención y control del cáncer de la mujer, 2015. ( <a href="https://www.gob.mx/salud">https://www.gob.mx/salud</a> )<br>Estados Unidos Mexicanos. Programa de acción específico, prevención y control del cáncer de la mujer 2013-2018 ( <a href="http://cnegrs.salud.gob.mx">http://cnegrs.salud.gob.mx</a> )                                                                                                                                                                                                                                                                                                                                                                 |
| <b>Nicaragua</b>                       | Yes | Ministerio de Salud. Protocolo de prevención del cáncer cérvico uterino a través del tamizaje con inspección visual con ácido acético (IVVA) y tratamiento con crioterapia-Normativa – 037. Nicaragua, 2010 ( <a href="http://www.minsa.gob.ni">http://www.minsa.gob.ni</a> )<br>Pan American Health Organization. Cervical Cancer Prevention and Control Programmes: A rapid assesment in 12 countries of Latin America, 2010 ( <a href="https://www.paho.org/">https://www.paho.org/</a> )                                                                                                                                                                                                                  |
| <b>Panama</b>                          | Yes | República de Panamá, Ministerio de Salud, Coordinación Nacional de Salud Sexual y Reproductiva. Normas de prevención, detección y seguimiento de las lesiones preinvasoras del cuello uterino y guías de manejo. Panamá, 2017 ( <a href="http://www.minsa.gob.pa">http://www.minsa.gob.pa</a> )                                                                                                                                                                                                                                                                                                                                                                                                               |
| <b>Paraguay</b>                        | Yes | República del Paraguay. Manual Nacional de Normas y Procedimientos para la prevención y el control del cáncer del tracto genital inferior femenino, 2015 ( <a href="http://portal.mspbs.gov.py/https://www.mspbs.gov.py/index.php">http://portal.mspbs.gov.py/https://www.mspbs.gov.py/index.php</a> )<br>República del Paraguay. El PAP Puede Salvarte la Vida. República del Paraguay; 2019 ( <a href="https://www.mspbs.gov.py/">https://www.mspbs.gov.py/</a> )<br>República del Paraguay. Novedosa Tecnología para la Detección del Cáncer de Cuello Uterino Disponible en Servicios. República del Paraguay, 2019 ( <a href="https://www.mspbs.gov.py/">https://www.mspbs.gov.py/</a> )                 |
| <b>Peru</b>                            | Yes | Resolución Ministerial N° 576-2019/MINSA para aprobar la Directiva Sanitaria N° 085-MINSA/2019/DGIESP "Directiva Sanitaria para la prevención del cáncer de cuello uterino mediante la detección temprana y tratamiento de lesiones pre malignas incluyendo carcinoma in situ ( <a href="https://www.gob.pe">https://www.gob.pe</a> )<br>National guideline based on the ministerial resolution N° 1013-2016/MINSA<br>Dirección General de Intervenciones Estratégicas en Salud Pública, Ministerio de Salud, Perú. Guía de Práctica Clínica para la Prevención y Manejo del Cáncer de Cuello Uterino, 2017 ( <a href="http://bibliotecavirtual.insnsb.gob.pe/">http://bibliotecavirtual.insnsb.gob.pe/</a> ) |
| <b>Puerto Rico</b>                     | Yes | Programa de Prevención y Detección Temprana de Cáncer de Mama y Cuello Uterino de Puerto Rico (PRCCEDP)<br>Puerto Rico Cancer Control Coalition and Puerto Rico, Comprehensive Control Programme. Puerto Rico Comprehensive Cancer Control Plan: 2015-2020. December 2014 ( <a href="https://ftp.cdc.gov/pub/Publications/Cancer/ccc/puerto_rico_ccc_plan.pdf">https://ftp.cdc.gov/pub/Publications/Cancer/ccc/puerto_rico_ccc_plan.pdf</a> )                                                                                                                                                                                                                                                                 |
| <b>St Kitts &amp; Nevis</b>            | Yes | Luciani S,et al. Cancer Prevention and Control in the Caribbean. Cancer Control. 2017;53–61.                                                                                                                                                                                                                                                                                                                                                                                                                                                                                                                                                                                                                  |
| <b>St. Lucia</b>                       | Yes | Luciani S,et al. Cancer Prevention and Control in the Caribbean. Cancer Control. 2017;53–61.                                                                                                                                                                                                                                                                                                                                                                                                                                                                                                                                                                                                                  |
| <b>St Vincent &amp; The Grenadines</b> | Yes | Pan American Health Organization. Situational Analysis of Cervical Cancer Prevention and Control in the Caribbean 2013 dic ( <a href="https://www.paho.org/">https://www.paho.org/</a> )<br>Luciani S,et al. Cancer Prevention and Control in the Caribbean. Cancer Control. 2017;53–61.                                                                                                                                                                                                                                                                                                                                                                                                                      |
| <b>Suriname</b>                        | No  |                                                                                                                                                                                                                                                                                                                                                                                                                                                                                                                                                                                                                                                                                                               |
| <b>Trinidad &amp; Tobago</b>           | Yes | Ministry of Health. Trinidad & Tobago. Women Health ( <a href="https://sites.google.com/health.gov.tt/womenshealth">https://sites.google.com/health.gov.tt/womenshealth</a> )                                                                                                                                                                                                                                                                                                                                                                                                                                                                                                                                 |
| <b>United States of America</b>        | Yes | US Preventive Services Task Force, Curry SJ,et al. Screening for Cervical Cancer: US Preventive Services Task Force Recommendation Statement. JAMA. 2018 Aug 21;320(7):674-686.                                                                                                                                                                                                                                                                                                                                                                                                                                                                                                                               |
| <b>Uruguay</b>                         | Yes | Ministerio de Salud Pública. Guía de Práctica Clínica de Tamizaje de Cáncer de Cuello de Útero. Uruguay, 2014 ( <a href="https://www.gub.uy/">https://www.gub.uy/</a> )                                                                                                                                                                                                                                                                                                                                                                                                                                                                                                                                       |
| <b>Venezuela</b>                       | Yes | Murillo R, et al. Cervical cancer in Central and South America: Burden of disease and status of disease control. Cancer Epidemiol 2016;44 (1): S121–30.                                                                                                                                                                                                                                                                                                                                                                                                                                                                                                                                                       |
| <b>OCEANIA</b>                         |     |                                                                                                                                                                                                                                                                                                                                                                                                                                                                                                                                                                                                                                                                                                               |
| <b>American Samoa</b>                  | Yes | Senkomago V, et al. Cancer Epidemiol. 2017 October ; 50(Pt B): 260–267.<br>Centers for Disease Control and Prevention. National Breast and Cervical Cancer Early Detection Programme (NBCCEDP) ( <a href="https://www.cdc.gov">https://www.cdc.gov</a> )                                                                                                                                                                                                                                                                                                                                                                                                                                                      |
| <b>Australia</b>                       | Yes | Australian Institute of Health and Welfare 2018. Cervical screening in Australia 2018. Cat. no. CAN 111. Canberra: AIHW ( <a href="https://www.aihw.gov.au/">https://www.aihw.gov.au/</a> )                                                                                                                                                                                                                                                                                                                                                                                                                                                                                                                   |
| <b>Cook Islands</b>                    | Yes | Cook Islands. National health Information Bulletin ( <a href="https://www.health.gov.ck/">https://www.health.gov.ck/</a> )                                                                                                                                                                                                                                                                                                                                                                                                                                                                                                                                                                                    |
| <b>Fiji</b>                            | Yes | Fiji develops comprehensive screening policy to fight cancer. Xinhua, May 8, 2015 ( <a href="http://www.china.org.cn">http://www.china.org.cn</a> )                                                                                                                                                                                                                                                                                                                                                                                                                                                                                                                                                           |
| <b>French Polynesia</b>                | Yes | Journal Officiel de la Polynesie Française. 3310 NS. 13 Juin 2019. Loi du Pays n° 2019-17 APF du 13 de Juin 2019 portant modification de la délibération n° 2003-173 APF du 6 novembre 2003 instituant un dépistage gratuit des cancers gynécologiques.                                                                                                                                                                                                                                                                                                                                                                                                                                                       |
| <b>FS Micronesia</b>                   | Yes | Townsend JS, et al. Current cervical cancer screening knowledge, awareness, and practices among U.S. affiliated pacific island providers: opportunities and challenges. Oncologist. 2014 Apr;19(4):383-93.<br>Federal States of Micronesia. Comprehensive cancer control plan 2013-2018 ( <a href="http://www.iccp-portal.org/">http://www.iccp-portal.org/</a> )<br>Workshop to Develop National Breast and Cervical Cancer Client Management Guidelines for Prevention, Detection, Treatment and Care in the Federated States of Micronesia 29 August to 2 September 2008 Pohnpei, Federated States of Micronesia Workshop Report ( <a href="http://pacificcancer.org/">http://pacificcancer.org/</a> )     |

|                         |     |                                                                                                                                                                                                                                                                                                                                                                                                                                                                                                                                     |
|-------------------------|-----|-------------------------------------------------------------------------------------------------------------------------------------------------------------------------------------------------------------------------------------------------------------------------------------------------------------------------------------------------------------------------------------------------------------------------------------------------------------------------------------------------------------------------------------|
| <b>Kiribati</b>         | Yes | WHO Country Capacity Survey 2019. WHO Global Health Observatory ( <a href="https://www.who.int/data/gho">https://www.who.int/data/gho</a> )                                                                                                                                                                                                                                                                                                                                                                                         |
| <b>Marshall Islands</b> | Yes | Townsend JS, et al. Current cervical cancer screening knowledge, awareness, and practices among U.S. affiliated pacific island providers: opportunities and challenges. <i>Oncologist</i> . 2014 Apr;19(4):383-93.<br>Ministry of Health & Human Services. Republic of Marshall Islands. National Comprehensive Cancer Control Plan 2017-2022 ( <a href="https://ftp.cdc.gov/pub/Publications/Cancer/ccc/marshall_islands_ccc_plan-508.pdf">https://ftp.cdc.gov/pub/Publications/Cancer/ccc/marshall_islands_ccc_plan-508.pdf</a> ) |
| <b>Nauru</b>            | No  |                                                                                                                                                                                                                                                                                                                                                                                                                                                                                                                                     |
| <b>New Zealand</b>      | Yes | National Cervical Screening Programme (NCSP), National Screening Unit, Ministry of Health, New Zealand ( <a href="https://www.nsu.govt.nz">https://www.nsu.govt.nz</a> )                                                                                                                                                                                                                                                                                                                                                            |
| <b>Niue</b>             | No  |                                                                                                                                                                                                                                                                                                                                                                                                                                                                                                                                     |
| <b>Palau</b>            | Yes | Tutii IM, et al. Breast and Cervical Cancer Screening in Palau: Have We Improved Early Detection and Survival? <i>Hawaii J Med Public Health</i> . 2017 Dec; 76(12): 337–343.<br>CDC. National Breast and Cervical Cancer Early Detection Programme (NBCCEDP) ( <a href="http://www.cdc.gov">http://www.cdc.gov</a> )                                                                                                                                                                                                               |
| <b>Papua New Guinea</b> | No  |                                                                                                                                                                                                                                                                                                                                                                                                                                                                                                                                     |
| <b>Samoa</b>            | No  |                                                                                                                                                                                                                                                                                                                                                                                                                                                                                                                                     |
| <b>Solomon Islands</b>  | No  |                                                                                                                                                                                                                                                                                                                                                                                                                                                                                                                                     |
| <b>Tokelau</b>          | No  |                                                                                                                                                                                                                                                                                                                                                                                                                                                                                                                                     |
| <b>Tonga</b>            | No  |                                                                                                                                                                                                                                                                                                                                                                                                                                                                                                                                     |
| <b>Tuvalu</b>           | No  |                                                                                                                                                                                                                                                                                                                                                                                                                                                                                                                                     |
| <b>Vanuatu</b>          | Yes | WHO Country Capacity Survey 2019. WHO Global Health Observatory ( <a href="https://www.who.int/data/gho">https://www.who.int/data/gho</a> )                                                                                                                                                                                                                                                                                                                                                                                         |
| <b>ASIA</b>             |     |                                                                                                                                                                                                                                                                                                                                                                                                                                                                                                                                     |
| <b>Afghanistan</b>      | No  |                                                                                                                                                                                                                                                                                                                                                                                                                                                                                                                                     |
| <b>Armenia</b>          | Yes | World Health Organization. The European Magazine for Sexual and Reproductive Health, 2007: 64. Avagyan G, Abrahamyan R. Implementation of the national programme on diagnoses, treatment and prevention of cervical cancer in Armenia, 2006-2015.<br>Non Communicable Disease Strategy and Action Plan 2016-2020, Government of the Republic of Armenia. Article 81 of Appendix 1 to the Decision N 111-N of January 15, 2015<br>World Health Organization (WHO). Health System Performance Assessment, Armenia, 2007               |
| <b>Azerbaijan</b>       | No  |                                                                                                                                                                                                                                                                                                                                                                                                                                                                                                                                     |
| <b>Bahrain</b>          | Yes | Ministry of Health-Kingdom of Bahrain. Women's tests available in health centers. 2017 ( <a href="https://www.moh.gov.bh">https://www.moh.gov.bh</a> )<br>Guideline for management of periodic women screening in primary care settings and outpatient clinics in the Kingdom of Bahrain. Breast and cervical cancer.                                                                                                                                                                                                               |
| <b>Bangladesh</b>       | Yes | Ministry of Health and Family Welfare. Government of the People's Republic of Bangladesh 2017. National Strategy for Cervical Cancer Prevention and Control Bangladesh (2017-2020) ( <a href="http://www.searo.who.int/bangladesh/cervical-cancer-prevention/en/">http://www.searo.who.int/bangladesh/cervical-cancer-prevention/en/</a> )                                                                                                                                                                                          |
| <b>Bhutan</b>           | Yes | Ministry of Health. Cervical cancer screening manual 2014 ( <a href="http://www.health.gov.bt">http://www.health.gov.bt</a> )                                                                                                                                                                                                                                                                                                                                                                                                       |
| <b>Brunei</b>           | Yes | Ministry of Health Brunei Darussalam. National Health Screening Guideline on Noncommunicable Diseases (NCDs). November 2019 Edition ( <a href="http://www.moh.gov.bn/">http://www.moh.gov.bn/</a> )                                                                                                                                                                                                                                                                                                                                 |
| <b>Cambodia</b>         | Yes | WHO Country Capacity Survey 2019. WHO Global Health Observatory ( <a href="https://www.who.int/data/gho">https://www.who.int/data/gho</a> )                                                                                                                                                                                                                                                                                                                                                                                         |
| <b>China</b>            | Yes | Personal communication (*)                                                                                                                                                                                                                                                                                                                                                                                                                                                                                                          |
| <b>Georgia</b>          | Yes | Levan J. Cervical Cancer Screening in Georgia. Eurasian Cancer Screening Conference. Minsk, Belarus. May 2018. [Oral Presentation-personal communication].<br>UNFPA Standard Progress Report 2014. GEO2U202 Support to Breast and Cervical Cancer Prevention                                                                                                                                                                                                                                                                        |
| <b>DPR Korea</b>        | Yes | Tran NT, et al. Knowledge, attitude and practice (KAP) concerning cervical cancer and screening among rural and urban women in six provinces of the Democratic People's Republic of Korea. <i>Asian Pac J Cancer Prev</i> . 2011;12(11):3029-33.                                                                                                                                                                                                                                                                                    |
| <b>Hong Kong SAR</b>    | Yes | Personal communication WHO country consultation (*)                                                                                                                                                                                                                                                                                                                                                                                                                                                                                 |

|                          |     |                                                                                                                                                                                                                                                                                                                                                                                                                                                                                                                                                                                                                                   |
|--------------------------|-----|-----------------------------------------------------------------------------------------------------------------------------------------------------------------------------------------------------------------------------------------------------------------------------------------------------------------------------------------------------------------------------------------------------------------------------------------------------------------------------------------------------------------------------------------------------------------------------------------------------------------------------------|
| <b>India</b>             | Yes | Ministry of Health and Welfare, India. Training Module for Medical Officers for Prevention, Control and Population Level Screening of Hypertension, Diabetes and Common Cancer (Oral, Breast & Cervical) (2017) ( <a href="http://nhsrcindia.org/">http://nhsrcindia.org/</a> )<br>Baggchi S. India Launches Plan for Cervical Cancer Screening. <i>BMJ</i> 2016;355:i5574                                                                                                                                                                                                                                                        |
| <b>Indonesia</b>         | Yes | M Wahidin. Overview of Ten Years (2007-2016) Cervical and Breast Cancer Screening Programme in Indonesia. <i>Journal of Global Oncology</i> 2018; 4, Supplement 2<br>Gondhowiardjo S, et al. Developing National Cancer Guideline: A Step Toward Standardized Multidisciplinary Management in Indonesia. <i>Journal of Global Oncology</i> 2018 4:Supplement 2, 161s-161s                                                                                                                                                                                                                                                         |
| <b>Iran</b>              | Yes | Ministry of Health and Medical Education, Iran. Programme for the Prevention and Early Diagnosis of Cervical Cancer ( <a href="http://behdasht.gov.ir">http://behdasht.gov.ir</a> )<br>Ministry of Health and Medical Education, Iran. Set of basic interventions for non-communicable diseases in the Iranian Primary Health Care System, Iran ( <a href="https://iums.ac.ir">https://iums.ac.ir</a> )                                                                                                                                                                                                                           |
| <b>Iraq</b>              | No  |                                                                                                                                                                                                                                                                                                                                                                                                                                                                                                                                                                                                                                   |
| <b>Israel</b>            | Yes | Israel cancer association. Early detection: Cervical cancer ( <a href="http://en.cancer.org.il">http://en.cancer.org.il</a> )                                                                                                                                                                                                                                                                                                                                                                                                                                                                                                     |
| <b>Japan</b>             | Yes | Hamashima C, et al. The Japanese guideline for cervical cancer screening. <i>Jpn J Clin Oncol.</i> 2010 Jun;40(6):485-502.<br>Sauvaget C, et al. Challenges in breast and cervical cancer control in Japan. <i>Lancet Oncol.</i> 2016 Jul;17(7):e305-e312.<br>National Cancer Center, Tokio. Cervical Cancer Screening ( <a href="https://ganjoho.jp">https://ganjoho.jp</a> )                                                                                                                                                                                                                                                    |
| <b>Jordan</b>            | No  |                                                                                                                                                                                                                                                                                                                                                                                                                                                                                                                                                                                                                                   |
| <b>Kazakhstan</b>        | Yes | Kaidarova D. Cervical Cancer Screening in Kazakhstan. Eurasian Cancer Screening Conference. Minsk, Belarus. May 2018. [Oral Presentation-personal communication].<br>Order of the Minister of Health of the Republic of Kazakhstan of December 25th, 2017 No. 995. Amendments to the Order of the Minister of Health of the Republic Kazakhstan of November 10th, 2009 No 685 "On approval of the Rules for preventive medical examinations of target populations" ["Об утверждении Правил проведения профилактических медицинских осмотров целевых групп населения"] ( <a href="http://adilet.zan.kz">http://adilet.zan.kz</a> ) |
| <b>Kuwait</b>            | No  |                                                                                                                                                                                                                                                                                                                                                                                                                                                                                                                                                                                                                                   |
| <b>Kyrgyzstan</b>        | No  |                                                                                                                                                                                                                                                                                                                                                                                                                                                                                                                                                                                                                                   |
| <b>Laos</b>              | No  |                                                                                                                                                                                                                                                                                                                                                                                                                                                                                                                                                                                                                                   |
| <b>Lebanon</b>           | No  |                                                                                                                                                                                                                                                                                                                                                                                                                                                                                                                                                                                                                                   |
| <b>Malaysia</b>          | Yes | Personal communication WHO country consultation (*)                                                                                                                                                                                                                                                                                                                                                                                                                                                                                                                                                                               |
| <b>Maldives</b>          | Yes | Practical and Cost-effective Screening for Cervical Cancer using VIA Launched in Maldives 23 January 2014 ( <a href="https://maldives.unfpa.org">https://maldives.unfpa.org</a> )<br>National cervical cancer screening plan 2016 ( <a href="http://www.health.gov.mv">http://www.health.gov.mv</a> )                                                                                                                                                                                                                                                                                                                             |
| <b>Mongolia</b>          | Yes | World Health Organization (WHO). Saving women's lives in Mongolia through cancer screening (2014) ( <a href="https://www.who.int">https://www.who.int</a> )                                                                                                                                                                                                                                                                                                                                                                                                                                                                       |
| <b>Myanmar</b>           | Yes | Personal communication WHO country consultation                                                                                                                                                                                                                                                                                                                                                                                                                                                                                                                                                                                   |
| <b>Nepal</b>             | Yes | National Guideline for Cervical Cancer Screening and Prevention in Nepal. Department of Health Services, Kathmandu: Government of Nepal; 2010<br>Public Health Perspective, Nepal. Annual Report of the Department of Health Services 2073/74 (2016/2017) ( <a href="https://phpnepal.org.np/">https://phpnepal.org.np/</a> )                                                                                                                                                                                                                                                                                                     |
| <b>Oman</b>              | No  |                                                                                                                                                                                                                                                                                                                                                                                                                                                                                                                                                                                                                                   |
| <b>Pakistan</b>          | No  |                                                                                                                                                                                                                                                                                                                                                                                                                                                                                                                                                                                                                                   |
| <b>Palestine</b>         | No  |                                                                                                                                                                                                                                                                                                                                                                                                                                                                                                                                                                                                                                   |
| <b>Philippines</b>       | Yes | Republic of Philippines. Department of Health. Office of the secretaty (2015). DM2015-0120 Guidelines on free cervical cancer screening in DOH Hospitals ( <a href="https://www.doh.gov.ph">https://www.doh.gov.ph</a> )                                                                                                                                                                                                                                                                                                                                                                                                          |
| <b>Qatar</b>             | Yes | Personal communication WHO country consultation (*)                                                                                                                                                                                                                                                                                                                                                                                                                                                                                                                                                                               |
| <b>Republic of Korea</b> | Yes | National Cancer Center 2018. Goyang-si Gyeonggi-do, Republic of Korea. Cancer Screening Programme ( <a href="https://www.ncc.re.kr">https://www.ncc.re.kr</a> )                                                                                                                                                                                                                                                                                                                                                                                                                                                                   |
| <b>Saudi Arabia</b>      | No  |                                                                                                                                                                                                                                                                                                                                                                                                                                                                                                                                                                                                                                   |
| <b>Singapore</b>         | Yes | CervicalScreen Singapore. Management Guidelines for Cervical Screening & Preinvasive Disease of the Cervix. February 2019 ( <a href="https://www.sccps.org">https://www.sccps.org</a> )                                                                                                                                                                                                                                                                                                                                                                                                                                           |



|                             |     |                                                                                                                                                                                                                                                                                                                                                                                                                                                                                                                                                                                                                                                                                              |
|-----------------------------|-----|----------------------------------------------------------------------------------------------------------------------------------------------------------------------------------------------------------------------------------------------------------------------------------------------------------------------------------------------------------------------------------------------------------------------------------------------------------------------------------------------------------------------------------------------------------------------------------------------------------------------------------------------------------------------------------------------|
| <b>Sri Lanka</b>            | Yes | Family Health Bureau. Ministry of Health Nutrition and Indigenous Medicine. Annual Reports ( <a href="https://fhb.health.gov.lk">https://fhb.health.gov.lk</a> )<br>Family Health Bureau. Ministry of Health Nutrition and Indigenous Medicine. Revised Guidelines for the Implementation of Well Women Services - for women of Reproductive and Pot reproductive Age (7th february 2018). Annual Reports ( <a href="https://fhb.health.gov.lk">https://fhb.health.gov.lk</a> )<br>Family Health Bureau. Ministry of Health Nutrition and Indigenous Medicine. National Strategic Plan 2019-2023. Well Woman Programme ( <a href="https://fhb.health.gov.lk">https://fhb.health.gov.lk</a> ) |
| <b>Syria</b>                | Yes | WHO Country Capacity Survey 2019. WHO Global Health Observatory ( <a href="https://www.who.int/data/gho">https://www.who.int/data/gho</a> )                                                                                                                                                                                                                                                                                                                                                                                                                                                                                                                                                  |
| <b>Tajikistan</b>           | No  |                                                                                                                                                                                                                                                                                                                                                                                                                                                                                                                                                                                                                                                                                              |
| <b>Thailand</b>             | Yes | Personal communication WHO country consultation (*)                                                                                                                                                                                                                                                                                                                                                                                                                                                                                                                                                                                                                                          |
| <b>Timor-Leste</b>          | Yes | WHO Country Capacity Survey 2019. WHO Global Health Observatory ( <a href="https://www.who.int/data/gho">https://www.who.int/data/gho</a> )                                                                                                                                                                                                                                                                                                                                                                                                                                                                                                                                                  |
| <b>Turkey</b>               | Yes | Gultekin M, et al. Initial results of population based cervical cancer screening programme using HPV testing in one million Turkish women. Int J Cancer. 2018 May 1;142(9):1952-1958.<br>National Standards for Cervical Cancer Screening Programme, turkey ( <a href="https://hsgm.saglik.gov.tr">https://hsgm.saglik.gov.tr</a> )                                                                                                                                                                                                                                                                                                                                                          |
| <b>Turkmenistan</b>         | Yes | Order of the Minister of Health and Medical Industry of Turkmenistan, 2018. Procedures for conducting clinical examination (dispensary) of citizens ["Порядок проведения диспансерного наблюдения (диспансеризации) граждан"] ( <a href="http://www.saglykhm.gov.tm">http://www.saglykhm.gov.tm</a> )                                                                                                                                                                                                                                                                                                                                                                                        |
| <b>United Arab Emirates</b> | Yes | Department of Health- Abu Dhabi, UAE. Cancer in Abu Dhabi-Cancer Programmes-Cervical Cancer Prevention and Screening Programmes. Live Healthy and Simply Check( <a href="https://www.doh.gov.ae/">https://www.doh.gov.ae/</a> )<br>Standard for the Cervical Cancer Screening Programme. Department of Health-Abu Dhabi, UAE; 2018 ( <a href="https://www.doh.gov.ae/">https://www.doh.gov.ae/</a> )                                                                                                                                                                                                                                                                                         |
| <b>Uzbekistan</b>           | No  |                                                                                                                                                                                                                                                                                                                                                                                                                                                                                                                                                                                                                                                                                              |
| <b>Viet Nam</b>             | Yes | Ministry of Health. Socialist Republic of Vietnam. Technical Guidelines on Screening and Treatment of Precancerous Lesions for Cervical Cancer Secondary Prevention (Promulgated by Ministerial Decision Nr.: 1476 /QD-BYT on May 16th, 2011).<br>Vietnam Ministry of Health. Joint annual Health review 2014 - Strengthening prevention and control of non-communicable disease. Hanoi, March 2015                                                                                                                                                                                                                                                                                          |
| <b>Yemen</b>                | No  |                                                                                                                                                                                                                                                                                                                                                                                                                                                                                                                                                                                                                                                                                              |

(\*) Contact: <https://hpvcentre.net/contactus.php>

### Tables S3.1 and S3.2. Coverage datapoints available by age and screening interval.

Of the 164 countries for which coverage data was available, most had data for the previous year, the previous three years, and/or ever in lifetime (46%, 48%, and 74% respectively). Coverage was available for at least one of the five screening intervals for a combination of 7 324 / 10 302 (71%) single age datapoints (Table S3.1). For the 30–49 age group, data completeness was higher with 3 260 / 4 040 (81%) datapoints available (Table S3.2).

**Table S3.1. Number and percentage of single ages with coverage datapoints, and number of countries with and without coverage data by screening interval, among women aged 20 to 70 years.**

|                                            | Screening interval |                    |                      |                     |                  | Total combined * |
|--------------------------------------------|--------------------|--------------------|----------------------|---------------------|------------------|------------------|
|                                            | Previous year      | Previous two years | Previous three years | Previous five years | Ever in lifetime |                  |
| N of single ages with coverage datapoint   | 3 239              | 1 110              | 3 451                | 1 580               | 5 472            | 7 324            |
| % of single ages with coverage datapoint   | 31%                | 11%                | 33%                  | 15%                 | 53%              | 71%              |
| N of countries with at least one datapoint | 76                 | 26                 | 79                   | 37                  | 122              | 164              |
| N of countries without data                | 126                | 176                | 123                  | 165                 | 80               | 38               |

\* Combination of at least one datapoint for any of the screening intervals.

**Table S3.2. Number and percentage of single ages with coverage datapoints, and number of countries with and without coverage data by screening interval, among women aged 30 to 49 years.**

|                                            | Screening interval |                    |                      |                     |                  | Total combined * |
|--------------------------------------------|--------------------|--------------------|----------------------|---------------------|------------------|------------------|
|                                            | Previous year      | Previous two years | Previous three years | Previous five years | Ever in lifetime |                  |
| N of single ages with coverage datapoint   | 1 500              | 515                | 1 570                | 700                 | 2 430            | 3 260            |
| % of single ages with coverage datapoint   | 37%                | 13%                | 39%                  | 17%                 | 60%              | 81%              |
| N of countries with at least one datapoint | 76                 | 26                 | 79                   | 35                  | 122              | 164              |
| N of countries without data                | 126                | 176                | 123                  | 167                 | 80               | 38               |

\* Combination of at least one datapoint for any of the screening intervals.

**Table S4. Stepwise algorithm to impute missing coverage data for each single age.**

| Order                                                 | Criteria                                                                                                                         | Example                                                                                                                                                                                                                                                                                                                                                                                                                                                                                                                                                                                                                                        | N single ages <sup>1</sup> | N data points <sup>2</sup> | N countries      |          |      |      |  |    |    |    |    |      |                        |    |      |      |      |      |      |     |    |      |                  |      |      |      |                          |                           |      |             |  |  |      |     |    |      |      |      |      |      |                           |   |    |
|-------------------------------------------------------|----------------------------------------------------------------------------------------------------------------------------------|------------------------------------------------------------------------------------------------------------------------------------------------------------------------------------------------------------------------------------------------------------------------------------------------------------------------------------------------------------------------------------------------------------------------------------------------------------------------------------------------------------------------------------------------------------------------------------------------------------------------------------------------|----------------------------|----------------------------|------------------|----------|------|------|--|----|----|----|----|------|------------------------|----|------|------|------|------|------|-----|----|------|------------------|------|------|------|--------------------------|---------------------------|------|-------------|--|--|------|-----|----|------|------|------|------|------|---------------------------|---|----|
| <b>Step 0</b>                                         | Original coverage data                                                                                                           | -                                                                                                                                                                                                                                                                                                                                                                                                                                                                                                                                                                                                                                              | 7324                       | 14 852                     | 164              |          |      |      |  |    |    |    |    |      |                        |    |      |      |      |      |      |     |    |      |                  |      |      |      |                          |                           |      |             |  |  |      |     |    |      |      |      |      |      |                           |   |    |
| <b>Countries with at least one coverage datapoint</b> |                                                                                                                                  |                                                                                                                                                                                                                                                                                                                                                                                                                                                                                                                                                                                                                                                |                            |                            |                  |          |      |      |  |    |    |    |    |      |                        |    |      |      |      |      |      |     |    |      |                  |      |      |      |                          |                           |      |             |  |  |      |     |    |      |      |      |      |      |                           |   |    |
| <b>Step 1</b>                                         | Modification of aggregated and out-of-recommendations coverage                                                                   | <table border="1"> <thead> <tr> <th rowspan="2">ISO</th> <th rowspan="2">Age</th> <th colspan="5">Coverage</th> </tr> <tr> <th>1y</th> <th>2y</th> <th>3y</th> <th>5y</th> <th>ever</th> </tr> </thead> <tbody> <tr> <td>BEL</td> <td>39</td> <td>46.4</td> <td>54.4</td> <td>80.0</td> <td>-</td> <td>7.9</td> </tr> <tr> <td>BEL</td> <td>40</td> <td>44.1</td> <td>51.7</td> <td>76.0</td> <td>-</td> <td>93.0</td> </tr> </tbody> </table>                                                                                                                                                                                                 | ISO                        | Age                        | Coverage         |          |      |      |  | 1y | 2y | 3y | 5y | ever | BEL                    | 39 | 46.4 | 54.4 | 80.0 | -    | 7.9  | BEL | 40 | 44.1 | 51.7             | 76.0 | -    | 93.0 | 336                      | 625                       | 10   |             |  |  |      |     |    |      |      |      |      |      |                           |   |    |
|                                                       |                                                                                                                                  | ISO                                                                                                                                                                                                                                                                                                                                                                                                                                                                                                                                                                                                                                            |                            |                            | Age              | Coverage |      |      |  |    |    |    |    |      |                        |    |      |      |      |      |      |     |    |      |                  |      |      |      |                          |                           |      |             |  |  |      |     |    |      |      |      |      |      |                           |   |    |
|                                                       |                                                                                                                                  |                                                                                                                                                                                                                                                                                                                                                                                                                                                                                                                                                                                                                                                | 1y                         | 2y                         |                  | 3y       | 5y   | ever |  |    |    |    |    |      |                        |    |      |      |      |      |      |     |    |      |                  |      |      |      |                          |                           |      |             |  |  |      |     |    |      |      |      |      |      |                           |   |    |
| BEL                                                   | 39                                                                                                                               | 46.4                                                                                                                                                                                                                                                                                                                                                                                                                                                                                                                                                                                                                                           | 54.4                       | 80.0                       | -                | 7.9      |      |      |  |    |    |    |    |      |                        |    |      |      |      |      |      |     |    |      |                  |      |      |      |                          |                           |      |             |  |  |      |     |    |      |      |      |      |      |                           |   |    |
| BEL                                                   | 40                                                                                                                               | 44.1                                                                                                                                                                                                                                                                                                                                                                                                                                                                                                                                                                                                                                           | 51.7                       | 76.0                       | -                | 93.0     |      |      |  |    |    |    |    |      |                        |    |      |      |      |      |      |     |    |      |                  |      |      |      |                          |                           |      |             |  |  |      |     |    |      |      |      |      |      |                           |   |    |
| <b>Step 2</b>                                         | Linear interpolation among screening intervals                                                                                   | <table border="1"> <thead> <tr> <th rowspan="2">ISO</th> <th rowspan="2">Age</th> <th colspan="5">Coverage</th> </tr> <tr> <th>1y</th> <th>2y</th> <th>3y</th> <th>5y</th> <th>ever</th> </tr> </thead> <tbody> <tr> <td>BGR</td> <td>34</td> <td>29.3</td> <td>43.5</td> <td>57.6</td> <td>60.5</td> <td>63.5</td> </tr> <tr> <td>BGR</td> <td>35</td> <td>26.7</td> <td>45.0</td> <td>63.3</td> <td>67.9</td> <td>72.6</td> </tr> </tbody> </table>                                                                                                                                                                                          | ISO                        | Age                        | Coverage         |          |      |      |  | 1y | 2y | 3y | 5y | ever | BGR                    | 34 | 29.3 | 43.5 | 57.6 | 60.5 | 63.5 | BGR | 35 | 26.7 | 45.0             | 63.3 | 67.9 | 72.6 | 3606                     | 4669                      | 84   |             |  |  |      |     |    |      |      |      |      |      |                           |   |    |
|                                                       |                                                                                                                                  | ISO                                                                                                                                                                                                                                                                                                                                                                                                                                                                                                                                                                                                                                            |                            |                            | Age              | Coverage |      |      |  |    |    |    |    |      |                        |    |      |      |      |      |      |     |    |      |                  |      |      |      |                          |                           |      |             |  |  |      |     |    |      |      |      |      |      |                           |   |    |
|                                                       |                                                                                                                                  |                                                                                                                                                                                                                                                                                                                                                                                                                                                                                                                                                                                                                                                | 1y                         | 2y                         |                  | 3y       | 5y   | ever |  |    |    |    |    |      |                        |    |      |      |      |      |      |     |    |      |                  |      |      |      |                          |                           |      |             |  |  |      |     |    |      |      |      |      |      |                           |   |    |
| BGR                                                   | 34                                                                                                                               | 29.3                                                                                                                                                                                                                                                                                                                                                                                                                                                                                                                                                                                                                                           | 43.5                       | 57.6                       | 60.5             | 63.5     |      |      |  |    |    |    |    |      |                        |    |      |      |      |      |      |     |    |      |                  |      |      |      |                          |                           |      |             |  |  |      |     |    |      |      |      |      |      |                           |   |    |
| BGR                                                   | 35                                                                                                                               | 26.7                                                                                                                                                                                                                                                                                                                                                                                                                                                                                                                                                                                                                                           | 45.0                       | 63.3                       | 67.9             | 72.6     |      |      |  |    |    |    |    |      |                        |    |      |      |      |      |      |     |    |      |                  |      |      |      |                          |                           |      |             |  |  |      |     |    |      |      |      |      |      |                           |   |    |
| <b>Step 3a</b>                                        | Predictive Mean Matching Method                                                                                                  | <table border="1"> <thead> <tr> <th rowspan="2">ISO</th> <th rowspan="2">Age</th> <th colspan="5">Coverage</th> </tr> <tr> <th>1y</th> <th>2y</th> <th>3y</th> <th>5y</th> <th>ever</th> </tr> </thead> <tbody> <tr> <td>ECU</td> <td>39</td> <td>16.7</td> <td>27.1</td> <td>34.1</td> <td>41.7</td> <td>68.0</td> </tr> <tr> <td>ECU</td> <td>40</td> <td>20.7</td> <td>37.1</td> <td>49.7</td> <td>59.0</td> <td>72.7</td> </tr> </tbody> </table>                                                                                                                                                                                          | ISO                        | Age                        | Coverage         |          |      |      |  | 1y | 2y | 3y | 5y | ever | ECU                    | 39 | 16.7 | 27.1 | 34.1 | 41.7 | 68.0 | ECU | 40 | 20.7 | 37.1             | 49.7 | 59.0 | 72.7 | 7324                     | 17 099                    | 164  |             |  |  |      |     |    |      |      |      |      |      |                           |   |    |
|                                                       |                                                                                                                                  | ISO                                                                                                                                                                                                                                                                                                                                                                                                                                                                                                                                                                                                                                            |                            |                            | Age              | Coverage |      |      |  |    |    |    |    |      |                        |    |      |      |      |      |      |     |    |      |                  |      |      |      |                          |                           |      |             |  |  |      |     |    |      |      |      |      |      |                           |   |    |
|                                                       |                                                                                                                                  |                                                                                                                                                                                                                                                                                                                                                                                                                                                                                                                                                                                                                                                | 1y                         | 2y                         |                  | 3y       | 5y   | ever |  |    |    |    |    |      |                        |    |      |      |      |      |      |     |    |      |                  |      |      |      |                          |                           |      |             |  |  |      |     |    |      |      |      |      |      |                           |   |    |
| ECU                                                   | 39                                                                                                                               | 16.7                                                                                                                                                                                                                                                                                                                                                                                                                                                                                                                                                                                                                                           | 27.1                       | 34.1                       | 41.7             | 68.0     |      |      |  |    |    |    |    |      |                        |    |      |      |      |      |      |     |    |      |                  |      |      |      |                          |                           |      |             |  |  |      |     |    |      |      |      |      |      |                           |   |    |
| ECU                                                   | 40                                                                                                                               | 20.7                                                                                                                                                                                                                                                                                                                                                                                                                                                                                                                                                                                                                                           | 37.1                       | 49.7                       | 59.0             | 72.7     |      |      |  |    |    |    |    |      |                        |    |      |      |      |      |      |     |    |      |                  |      |      |      |                          |                           |      |             |  |  |      |     |    |      |      |      |      |      |                           |   |    |
| <b>Step 5</b>                                         | Verification of coverage's rule and if not followed, reorder of coverage data and linear interpolation among screening intervals | <table border="1"> <thead> <tr> <th rowspan="2">ISO</th> <th rowspan="2">Age</th> <th colspan="5">Coverage</th> </tr> <tr> <th>1y</th> <th>2y</th> <th>3y</th> <th>5y</th> <th>ever</th> </tr> </thead> <tbody> <tr> <td>AND</td> <td>30</td> <td>61.4</td> <td>80.0</td> <td>79.0</td> <td>84.3</td> <td>80.5</td> </tr> <tr> <td>AND</td> <td>30</td> <td>61.4</td> <td colspan="4">→[original data]</td> </tr> <tr> <td>AND</td> <td>30</td> <td>61.4</td> <td colspan="3">[maximum] →</td> <td>84.3</td> </tr> <tr> <td>AND</td> <td>30</td> <td>61.4</td> <td>67.1</td> <td>72.9</td> <td>78.6</td> <td>84.3</td> </tr> </tbody> </table> | ISO                        | Age                        | Coverage         |          |      |      |  | 1y | 2y | 3y | 5y | ever | AND                    | 30 | 61.4 | 80.0 | 79.0 | 84.3 | 80.5 | AND | 30 | 61.4 | →[original data] |      |      |      | AND                      | 30                        | 61.4 | [maximum] → |  |  | 84.3 | AND | 30 | 61.4 | 67.1 | 72.9 | 78.6 | 84.3 | 116 154 (include 40 imp.) | - | 88 |
|                                                       |                                                                                                                                  | ISO                                                                                                                                                                                                                                                                                                                                                                                                                                                                                                                                                                                                                                            |                            |                            | Age              | Coverage |      |      |  |    |    |    |    |      |                        |    |      |      |      |      |      |     |    |      |                  |      |      |      |                          |                           |      |             |  |  |      |     |    |      |      |      |      |      |                           |   |    |
|                                                       |                                                                                                                                  |                                                                                                                                                                                                                                                                                                                                                                                                                                                                                                                                                                                                                                                | 1y                         | 2y                         |                  | 3y       | 5y   | ever |  |    |    |    |    |      |                        |    |      |      |      |      |      |     |    |      |                  |      |      |      |                          |                           |      |             |  |  |      |     |    |      |      |      |      |      |                           |   |    |
|                                                       |                                                                                                                                  | AND                                                                                                                                                                                                                                                                                                                                                                                                                                                                                                                                                                                                                                            | 30                         | 61.4                       | 80.0             | 79.0     | 84.3 | 80.5 |  |    |    |    |    |      |                        |    |      |      |      |      |      |     |    |      |                  |      |      |      |                          |                           |      |             |  |  |      |     |    |      |      |      |      |      |                           |   |    |
|                                                       |                                                                                                                                  | AND                                                                                                                                                                                                                                                                                                                                                                                                                                                                                                                                                                                                                                            | 30                         | 61.4                       | →[original data] |          |      |      |  |    |    |    |    |      |                        |    |      |      |      |      |      |     |    |      |                  |      |      |      |                          |                           |      |             |  |  |      |     |    |      |      |      |      |      |                           |   |    |
| AND                                                   | 30                                                                                                                               | 61.4                                                                                                                                                                                                                                                                                                                                                                                                                                                                                                                                                                                                                                           | [maximum] →                |                            |                  | 84.3     |      |      |  |    |    |    |    |      |                        |    |      |      |      |      |      |     |    |      |                  |      |      |      |                          |                           |      |             |  |  |      |     |    |      |      |      |      |      |                           |   |    |
| AND                                                   | 30                                                                                                                               | 61.4                                                                                                                                                                                                                                                                                                                                                                                                                                                                                                                                                                                                                                           | 67.1                       | 72.9                       | 78.6             | 84.3     |      |      |  |    |    |    |    |      |                        |    |      |      |      |      |      |     |    |      |                  |      |      |      |                          |                           |      |             |  |  |      |     |    |      |      |      |      |      |                           |   |    |
| <b>Step 3b</b>                                        | Last observation carried forward / Next observation carried backward                                                             | <table border="1"> <thead> <tr> <th rowspan="2">ISO</th> <th rowspan="2">Age</th> <th colspan="5">Coverage</th> </tr> <tr> <th>1y</th> <th>2y</th> <th>3y</th> <th>5y</th> <th>ever</th> </tr> </thead> <tbody> <tr> <td>SLV</td> <td>49</td> <td>44.6</td> <td>68.6</td> <td>78.1</td> <td>87.6</td> <td>97.1</td> </tr> <tr> <td>SLV</td> <td>50</td> <td>44.6</td> <td>68.6</td> <td>78.1</td> <td>87.6</td> <td>97.1</td> </tr> </tbody> </table>                                                                                                                                                                                          | ISO                        | Age                        | Coverage         |          |      |      |  | 1y | 2y | 3y | 5y | ever | SLV                    | 49 | 44.6 | 68.6 | 78.1 | 87.6 | 97.1 | SLV | 50 | 44.6 | 68.6             | 78.1 | 87.6 | 97.1 | 11 680 (include 40 imp.) | 58 400 (include 40 imp.)  | 85   |             |  |  |      |     |    |      |      |      |      |      |                           |   |    |
|                                                       |                                                                                                                                  | ISO                                                                                                                                                                                                                                                                                                                                                                                                                                                                                                                                                                                                                                            |                            |                            | Age              | Coverage |      |      |  |    |    |    |    |      |                        |    |      |      |      |      |      |     |    |      |                  |      |      |      |                          |                           |      |             |  |  |      |     |    |      |      |      |      |      |                           |   |    |
|                                                       |                                                                                                                                  |                                                                                                                                                                                                                                                                                                                                                                                                                                                                                                                                                                                                                                                | 1y                         | 2y                         |                  | 3y       | 5y   | ever |  |    |    |    |    |      |                        |    |      |      |      |      |      |     |    |      |                  |      |      |      |                          |                           |      |             |  |  |      |     |    |      |      |      |      |      |                           |   |    |
| SLV                                                   | 49                                                                                                                               | 44.6                                                                                                                                                                                                                                                                                                                                                                                                                                                                                                                                                                                                                                           | 68.6                       | 78.1                       | 87.6             | 97.1     |      |      |  |    |    |    |    |      |                        |    |      |      |      |      |      |     |    |      |                  |      |      |      |                          |                           |      |             |  |  |      |     |    |      |      |      |      |      |                           |   |    |
| SLV                                                   | 50                                                                                                                               | 44.6                                                                                                                                                                                                                                                                                                                                                                                                                                                                                                                                                                                                                                           | 68.6                       | 78.1                       | 87.6             | 97.1     |      |      |  |    |    |    |    |      |                        |    |      |      |      |      |      |     |    |      |                  |      |      |      |                          |                           |      |             |  |  |      |     |    |      |      |      |      |      |                           |   |    |
| <b>Step 3c</b>                                        | Calculation of a ponderation rate from countries with same income and ages included in the screening recommendations             | <table border="1"> <thead> <tr> <th rowspan="2">ISO</th> <th rowspan="2">Age</th> <th colspan="5">Coverage</th> </tr> <tr> <th>1y</th> <th>2y</th> <th>3y</th> <th>5y</th> <th>ever</th> </tr> </thead> <tbody> <tr> <td>CUB</td> <td>64</td> <td>48.1</td> <td>67.1</td> <td>75.6</td> <td>82.3</td> <td>87.1</td> </tr> <tr> <td>CUB</td> <td>65</td> <td>32.9</td> <td>45.3</td> <td>50.0</td> <td>60.5</td> <td>70.5</td> </tr> </tbody> </table>                                                                                                                                                                                          | ISO                        | Age                        | Coverage         |          |      |      |  | 1y | 2y | 3y | 5y | ever | CUB                    | 64 | 48.1 | 67.1 | 75.6 | 82.3 | 87.1 | CUB | 65 | 32.9 | 45.3             | 50.0 | 60.5 | 70.5 | 29 920 (include 40 imp.) | 149 600 (include 40 imp.) | 56   |             |  |  |      |     |    |      |      |      |      |      |                           |   |    |
|                                                       |                                                                                                                                  | ISO                                                                                                                                                                                                                                                                                                                                                                                                                                                                                                                                                                                                                                            |                            |                            | Age              | Coverage |      |      |  |    |    |    |    |      |                        |    |      |      |      |      |      |     |    |      |                  |      |      |      |                          |                           |      |             |  |  |      |     |    |      |      |      |      |      |                           |   |    |
|                                                       |                                                                                                                                  |                                                                                                                                                                                                                                                                                                                                                                                                                                                                                                                                                                                                                                                | 1y                         | 2y                         |                  | 3y       | 5y   | ever |  |    |    |    |    |      |                        |    |      |      |      |      |      |     |    |      |                  |      |      |      |                          |                           |      |             |  |  |      |     |    |      |      |      |      |      |                           |   |    |
| CUB                                                   | 64                                                                                                                               | 48.1                                                                                                                                                                                                                                                                                                                                                                                                                                                                                                                                                                                                                                           | 67.1                       | 75.6                       | 82.3             | 87.1     |      |      |  |    |    |    |    |      |                        |    |      |      |      |      |      |     |    |      |                  |      |      |      |                          |                           |      |             |  |  |      |     |    |      |      |      |      |      |                           |   |    |
| CUB                                                   | 65                                                                                                                               | 32.9                                                                                                                                                                                                                                                                                                                                                                                                                                                                                                                                                                                                                                           | 45.3                       | 50.0                       | 60.5             | 70.5     |      |      |  |    |    |    |    |      |                        |    |      |      |      |      |      |     |    |      |                  |      |      |      |                          |                           |      |             |  |  |      |     |    |      |      |      |      |      |                           |   |    |
| <b>Step 5</b>                                         | Verification of coverage's rule and if not followed, reorder of coverage data and                                                | <table border="1"> <thead> <tr> <th rowspan="2">ISO</th> <th rowspan="2">Age</th> <th colspan="5">Coverage</th> </tr> <tr> <th>1y</th> <th>2y</th> <th>3y</th> <th>5y</th> <th>ever</th> </tr> </thead> <tbody> </tbody> </table>                                                                                                                                                                                                                                                                                                                                                                                                              | ISO                        | Age                        | Coverage         |          |      |      |  | 1y | 2y | 3y | 5y | ever | 3544 (include 40 imp.) | -  | 28   |      |      |      |      |     |    |      |                  |      |      |      |                          |                           |      |             |  |  |      |     |    |      |      |      |      |      |                           |   |    |
| ISO                                                   | Age                                                                                                                              | Coverage                                                                                                                                                                                                                                                                                                                                                                                                                                                                                                                                                                                                                                       |                            |                            |                  |          |      |      |  |    |    |    |    |      |                        |    |      |      |      |      |      |     |    |      |                  |      |      |      |                          |                           |      |             |  |  |      |     |    |      |      |      |      |      |                           |   |    |
|                                                       |                                                                                                                                  | 1y                                                                                                                                                                                                                                                                                                                                                                                                                                                                                                                                                                                                                                             | 2y                         | 3y                         | 5y               | ever     |      |      |  |    |    |    |    |      |                        |    |      |      |      |      |      |     |    |      |                  |      |      |      |                          |                           |      |             |  |  |      |     |    |      |      |      |      |      |                           |   |    |

|                                              | linear among intervals                                                                                                           | interpolation screening | ISO        | Age        | 10.1            | 7.7         | 10.5      | 14.0      | 18.0        |                          |      |    |
|----------------------------------------------|----------------------------------------------------------------------------------------------------------------------------------|-------------------------|------------|------------|-----------------|-------------|-----------|-----------|-------------|--------------------------|------|----|
|                                              |                                                                                                                                  |                         | LSO        | 65         | 10.1            | 7.7         | 10.5      | 14.0      | 18.0        |                          |      |    |
|                                              |                                                                                                                                  |                         | LSO        | 65         | 7.7             | → [minimum] |           |           |             |                          |      |    |
|                                              |                                                                                                                                  |                         | LSO        | 65         | 7.7             | [maximum] → |           |           | 18.0        |                          |      |    |
|                                              |                                                                                                                                  |                         | LSO        | 65         | 7.7             | 10.3        | 12.9      | 15.5      | 13.8        |                          |      |    |
| <b>Countries without coverage datapoints</b> |                                                                                                                                  |                         |            |            |                 |             |           |           |             |                          |      |    |
| <b>Step 4</b>                                | Predictive Matching Method                                                                                                       | Mean                    | <b>ISO</b> | <b>Age</b> | <b>Coverage</b> |             |           |           |             | 1938                     | 9690 | 38 |
|                                              |                                                                                                                                  |                         |            |            | <b>1y</b>       | <b>2y</b>   | <b>3y</b> | <b>5y</b> | <b>ever</b> |                          |      |    |
|                                              |                                                                                                                                  |                         | GMB        | 45         | 6.4             | 8.8         | 5.8       | 0.5       | 15.2        |                          |      |    |
|                                              |                                                                                                                                  |                         | GMB        | 46         | 7.4             | 14.9        | 5.0       | 0.5       | 6.0         |                          |      |    |
| <b>Step 5</b>                                | Verification of coverage's rule and if not followed, reorder of coverage data and linear interpolation among screening intervals |                         | <b>ISO</b> | <b>Age</b> | <b>Coverage</b> |             |           |           |             | 61 814 (include 40 imp.) | -    | 34 |
|                                              |                                                                                                                                  |                         |            |            | <b>1y</b>       | <b>2y</b>   | <b>3y</b> | <b>5y</b> | <b>ever</b> |                          |      |    |
|                                              |                                                                                                                                  |                         | RWA        | 20         | 0.4             | 1.8         | 0.2       | 2.3       | 2.6         |                          |      |    |
|                                              |                                                                                                                                  |                         | RWA        | 20         | 0.2             | → [minimum] |           |           |             |                          |      |    |
|                                              |                                                                                                                                  |                         | RWA        | 20         | 0.2             | [maximum] → |           |           | 2.6         |                          |      |    |
|                                              |                                                                                                                                  |                         | RWA        | 20         | 0.2             | 0.8         | 1.4       | 2.0       | 2.6         |                          |      |    |

Estimates with white background in the table are original data. Coloured estimates in blue, red, pink, orange and purple are imputed. Coloured estimates in grey are modified because coverage's rule was not followed. <sup>1</sup> N single ages included single ages with at least one coverage datapoint; <sup>2</sup> N data points included the single ages for the five screening intervals (previous year, previous two years, previous three years, previous five years, ever in lifetime); imp: imputations.

**Table S5. Impact of the imputation algorithm in the estimations.**

We evaluated the impact of the algorithm in the coverage estimates. In the table below we presented the number of targeted and screened women (in the previous year, three years, five years, ever in lifetime), and the percentage of datapoints obtained originally and imputed in each step, worldwide and by income level.

|                                                            | Number<br>(in<br>Millions) | % of<br>Original<br>data | Imputation algorithm                              |                                         |                        |                                                |                                        |
|------------------------------------------------------------|----------------------------|--------------------------|---------------------------------------------------|-----------------------------------------|------------------------|------------------------------------------------|----------------------------------------|
|                                                            |                            |                          | Countries with at least<br>one coverage datapoint |                                         |                        | Countries<br>without<br>coverage<br>datapoints |                                        |
|                                                            |                            |                          | Lineal<br>interpo-<br>lation<br>(S1)              | Predictive<br>Mean<br>Matching<br>(S3a) | LOCF/<br>NOCB<br>(S3b) | Pondera-<br>tion<br>rate<br>(S3c)              | Predictive<br>Mean<br>Matching<br>(S4) |
| <b>World</b>                                               |                            |                          |                                                   |                                         |                        |                                                |                                        |
| Targeted women (30-49y)                                    | 1 032 M                    |                          |                                                   |                                         |                        |                                                |                                        |
| Screened women in the<br>previous year (30-49y)            | 160 M                      | <b>47%</b>               | 0%                                                | <b>51%</b>                              | 0%                     | 0%                                             | 2%                                     |
| Screened women in the<br>previous three years (30-<br>49y) | 292 M                      | <b>70%</b>               | 4%                                                | <b>23%</b>                              | 0%                     | 0%                                             | 3%                                     |
| Screened women in the<br>previous five years (30-<br>49y)  | 330 M                      | 28%                      | <b>39%</b>                                        | <b>30%</b>                              | 0%                     | 0%                                             | 3%                                     |
| Screened women ever in<br>lifetime (30-49y)                | 370 M                      | <b>63%</b>               | 0%                                                | <b>34%</b>                              | 0%                     | 0%                                             | 3%                                     |
| <b>High-income</b>                                         |                            |                          |                                                   |                                         |                        |                                                |                                        |
| Targeted women (30-49y)                                    | 158 M                      |                          |                                                   |                                         |                        |                                                |                                        |
| Screened women in the<br>previous year (30-49y)            | 67 M                       | <b>73%</b>               | 0%                                                | <b>27%</b>                              | 0%                     | 0%                                             | 0%                                     |
| Screened women in the<br>previous 3 years (30-49y)         | 111 M                      | <b>81%</b>               | 6%                                                | <b>13%</b>                              | 0%                     | 0%                                             | 0%                                     |
| Screened women in the<br>previous 5 years (30-49y)         | 121 M                      | <b>51%</b>               | <b>29%</b>                                        | 20%                                     | 0%                     | 0%                                             | 0%                                     |
| Screened women ever in<br>lifetime (30-49y)                | 133 M                      | <b>72%</b>               | 0%                                                | <b>28%</b>                              | 0%                     | 0%                                             | 0%                                     |
| <b>Upper middle-income</b>                                 |                            |                          |                                                   |                                         |                        |                                                |                                        |
| Targeted women (30-49y)                                    | 404 M                      |                          |                                                   |                                         |                        |                                                |                                        |
| Screened women in the<br>previous year (30-49y)            | 76 M                       | 26%                      | 0%                                                | <b>72%</b>                              | 0%                     | 0%                                             | 2%                                     |
| Screened women in the<br>previous 3 years (30-49y)         | 152 M                      | <b>72%</b>               | 1%                                                | <b>26%</b>                              | 0%                     | 0%                                             | 1%                                     |
| Screened women in the<br>previous 5 years (30-49y)         | 173 M                      | 13%                      | <b>52%</b>                                        | <b>34%</b>                              | 0%                     | 0%                                             | 1%                                     |
| Screened women ever in<br>lifetime (30-49y)                | 194 M                      | <b>59%</b>               | 0%                                                | <b>39%</b>                              | 0%                     | 0%                                             | 2%                                     |
| <b>Lower middle-income</b>                                 |                            |                          |                                                   |                                         |                        |                                                |                                        |
| Targeted women (30-49y)                                    | 397 M                      |                          |                                                   |                                         |                        |                                                |                                        |
| Screened women in the<br>previous year (30-49y)            | 15 M                       | <b>44%</b>               | 0%                                                | <b>52%</b>                              | 0%                     | 0%                                             | 4%                                     |

|                                                 |       |            |     |            |    |    |            |
|-------------------------------------------------|-------|------------|-----|------------|----|----|------------|
| Screened women in the previous 3 years (30-49y) | 25 M  | <b>26%</b> | 10% | <b>54%</b> | 0% | 0% | 10%        |
| Screened women in the previous 5 years (30-49y) | 30 M  | <b>21%</b> | 10% | <b>58%</b> | 0% | 0% | 11%        |
| Screened women ever in lifetime (30-49y)        | 34 M  | <b>54%</b> | 0%  | <b>34%</b> | 0% | 0% | 12%        |
| <b>Low-income</b>                               |       |            |     |            |    |    |            |
| Targeted women (30-49y)                         | 74 M  |            |     |            |    |    |            |
| Screened women in the previous year (30-49y)    | 1,9 M | 13%        | 0%  | <b>23%</b> | 0% | 1% | <b>63%</b> |
| Screened women in the previous 3 years (30-49y) | 4,9 M | 12%        | 5%  | <b>16%</b> | 0% | 0% | <b>67%</b> |
| Screened women in the previous 5 years (30-49y) | 6,5 M | 13%        | 1%  | <b>20%</b> | 0% | 0% | <b>66%</b> |
| Screened women ever in lifetime (30-49y)        | 8,2 M | <b>26%</b> | 0%  | 9%         | 0% | 0% | <b>65%</b> |

M: Million. LOCF/NOCB: Last observation carried forward / next observation carried backward.

**Table S6. Sensitivity analysis of screening coverage estimates for women aged 30-49 years under different scenarios of age.**

|                                           | In the previous year<br>Coverage (%) |            |            | In the previous three years<br>Coverage (%) |            |            | In the previous five years<br>Coverage (%) |            |            | Ever in lifetime<br>Coverage (%) |            |            |
|-------------------------------------------|--------------------------------------|------------|------------|---------------------------------------------|------------|------------|--------------------------------------------|------------|------------|----------------------------------|------------|------------|
|                                           | S1                                   | S2         | S3         | S1                                          | S2         | S3         | S1                                         | S2         | S3         | S1                               | S2         | S3         |
| <b>World</b>                              | <b>15%</b>                           | <b>15%</b> | <b>15%</b> | <b>28%</b>                                  | <b>28%</b> | <b>28%</b> | <b>31%</b>                                 | <b>32%</b> | <b>32%</b> | <b>35%</b>                       | <b>35%</b> | <b>36%</b> |
| <b>Income</b>                             |                                      |            |            |                                             |            |            |                                            |            |            |                                  |            |            |
| High-Income                               | 42%                                  | 42%        | 41%        | 70%                                         | 70%        | 70%        | 76%                                        | 76%        | 77%        | 83%                              | 84%        | 84%        |
| Low And Middle-Income                     | 10%                                  | 10%        | 10%        | 20%                                         | 20%        | 20%        | 23%                                        | 23%        | 23%        | 27%                              | 27%        | 27%        |
| Upper Middle-Income                       | 18%                                  | 18%        | 18%        | 37%                                         | 37%        | 37%        | 42%                                        | 42%        | 42%        | 48%                              | 48%        | 48%        |
| Lower Middle-Income                       | 3%                                   | 3%         | 3%         | 6%                                          | 6%         | 6%         | 7%                                         | 7%         | 7%         | 8%                               | 8%         | 8%         |
| Low-Income                                | 2%                                   | 2%         | 3%         | 6%                                          | 6%         | 7%         | 8%                                         | 9%         | 9%         | 11%                              | 11%        | 12%        |
| <b>SDG Regions and Subregions</b>         |                                      |            |            |                                             |            |            |                                            |            |            |                                  |            |            |
| <b>Sub-Saharan Africa</b>                 | <b>3%</b>                            | <b>4%</b>  | <b>4%</b>  | <b>8%</b>                                   | <b>8%</b>  | <b>9%</b>  | <b>11%</b>                                 | <b>11%</b> | <b>11%</b> | <b>14%</b>                       | <b>14%</b> | <b>14%</b> |
| Eastern Africa                            | 2%                                   | 2%         | 3%         | 6%                                          | 6%         | 6%         | 8%                                         | 8%         | 9%         | 10%                              | 11%        | 11%        |
| Middle Africa                             | 2%                                   | 2%         | 2%         | 7%                                          | 7%         | 7%         | 9%                                         | 9%         | 9%         | 12%                              | 12%        | 11%        |
| Southern Africa                           | 21%                                  | 24%        | 23%        | 33%                                         | 33%        | 33%        | 42%                                        | 42%        | 42%        | 50%                              | 50%        | 50%        |
| Western Africa                            | 2%                                   | 2%         | 2%         | 6%                                          | 6%         | 6%         | 8%                                         | 9%         | 8%         | 11%                              | 11%        | 10%        |
| <b>Northern Africa &amp; Western Asia</b> | <b>8%</b>                            | <b>8%</b>  | <b>7%</b>  | <b>17%</b>                                  | <b>17%</b> | <b>16%</b> | <b>24%</b>                                 | <b>24%</b> | <b>23%</b> | <b>28%</b>                       | <b>28%</b> | <b>28%</b> |
| Northern Africa                           | 4%                                   | 4%         | 4%         | 7%                                          | 7%         | 7%         | 8%                                         | 8%         | 8%         | 8%                               | 8%         | 8%         |
| Western Asia                              | 11%                                  | 11%        | 10%        | 25%                                         | 25%        | 24%        | 38%                                        | 38%        | 37%        | 44%                              | 45%        | 45%        |
| <b>Central &amp; Southern Asia</b>        | <b>3%</b>                            | <b>3%</b>  | <b>3%</b>  | <b>5%</b>                                   | <b>5%</b>  | <b>5%</b>  | <b>6%</b>                                  | <b>6%</b>  | <b>6%</b>  | <b>7%</b>                        | <b>7%</b>  | <b>7%</b>  |
| Central Asia                              | 7%                                   | 8%         | 8%         | 18%                                         | 19%        | 18%        | 29%                                        | 29%        | 29%        | 33%                              | 33%        | 34%        |
| Southern Asia                             | 3%                                   | 3%         | 3%         | 4%                                          | 4%         | 4%         | 5%                                         | 5%         | 5%         | 6%                               | 6%         | 5%         |
| <b>Eastern &amp; South-Eastern Asia</b>   | <b>12%</b>                           | <b>12%</b> | <b>12%</b> | <b>26%</b>                                  | <b>26%</b> | <b>27%</b> | <b>29%</b>                                 | <b>29%</b> | <b>29%</b> | <b>32%</b>                       | <b>32%</b> | <b>32%</b> |
| Eastern Asia                              | 15%                                  | 15%        | 14%        | 31%                                         | 31%        | 31%        | 33%                                        | 33%        | 33%        | 35%                              | 35%        | 36%        |
| South-Eastern Asia                        | 6%                                   | 6%         | 7%         | 14%                                         | 14%        | 14%        | 19%                                        | 19%        | 19%        | 22%                              | 22%        | 23%        |
| <b>Latin America &amp; Caribbean</b>      | <b>29%</b>                           | <b>29%</b> | <b>29%</b> | <b>54%</b>                                  | <b>54%</b> | <b>55%</b> | <b>61%</b>                                 | <b>61%</b> | <b>62%</b> | <b>73%</b>                       | <b>74%</b> | <b>75%</b> |
| Caribbean                                 | 35%                                  | 35%        | 35%        | 58%                                         | 58%        | 58%        | 64%                                        | 64%        | 64%        | 69%                              | 69%        | 69%        |
| Central America                           | 38%                                  | 38%        | 38%        | 66%                                         | 67%        | 70%        | 75%                                        | 77%        | 79%        | 85%                              | 87%        | 88%        |
| South America                             | 25%                                  | 25%        | 24%        | 48%                                         | 49%        | 49%        | 55%                                        | 55%        | 56%        | 68%                              | 70%        | 70%        |
| <b>Oceania (Excl. AUS/NZL)</b>            | <b>2%</b>                            | <b>1%</b>  | <b>1%</b>  | <b>6%</b>                                   | <b>5%</b>  | <b>5%</b>  | <b>8%</b>                                  | <b>7%</b>  | <b>8%</b>  | <b>10%</b>                       | <b>10%</b> | <b>12%</b> |
| Melanesia                                 | 1%                                   | 0%         | 0%         | 3%                                          | 3%         | 3%         | 5%                                         | 5%         | 5%         | 7%                               | 7%         | 9%         |
| Micronesia                                | 12%                                  | 12%        | 11%        | 21%                                         | 21%        | 20%        | 24%                                        | 24%        | 24%        | 29%                              | 29%        | 29%        |
| Polynesia                                 | 13%                                  | 13%        | 12%        | 34%                                         | 34%        | 35%        | 43%                                        | 42%        | 42%        | 51%                              | 50%        | 51%        |
| <b>Australia &amp; New Zealand</b>        | <b>26%</b>                           | <b>26%</b> | <b>26%</b> | <b>71%</b>                                  | <b>71%</b> | <b>71%</b> | <b>84%</b>                                 | <b>85%</b> | <b>86%</b> | <b>95%</b>                       | <b>96%</b> | <b>96%</b> |
| <b>Europe &amp; Northern America</b>      | <b>43%</b>                           | <b>43%</b> | <b>43%</b> | <b>73%</b>                                  | <b>73%</b> | <b>73%</b> | <b>81%</b>                                 | <b>81%</b> | <b>81%</b> | <b>88%</b>                       | <b>88%</b> | <b>88%</b> |
| Eastern Europe                            | 39%                                  | 39%        | 39%        | 69%                                         | 69%        | 69%        | 77%                                        | 77%        | 77%        | 85%                              | 84%        | 85%        |
| Northern Europe                           | 34%                                  | 34%        | 36%        | 69%                                         | 69%        | 69%        | 80%                                        | 80%        | 80%        | 91%                              | 91%        | 88%        |
| Southern Europe                           | 43%                                  | 44%        | 42%        | 75%                                         | 75%        | 75%        | 82%                                        | 82%        | 82%        | 89%                              | 88%        | 88%        |
| Western Europe                            | 51%                                  | 51%        | 50%        | 76%                                         | 76%        | 76%        | 84%                                        | 84%        | 84%        | 94%                              | 94%        | 94%        |
| Northern America                          | 47%                                  | 47%        | 47%        | 77%                                         | 77%        | 77%        | 82%                                        | 82%        | 82%        | 88%                              | 88%        | 88%        |

S: Scenario; SDG: Sustainable Development Goals. Scenario 1 includes data between ages 20 to 70 years. Scenario 2 includes data between ages 25 to 65 years. Scenario 3 includes data between ages 30 to 49 years.

Figure S6.1. Screening coverage estimates for women aged 30-49 years under different scenarios of age, worldwide and by income level.

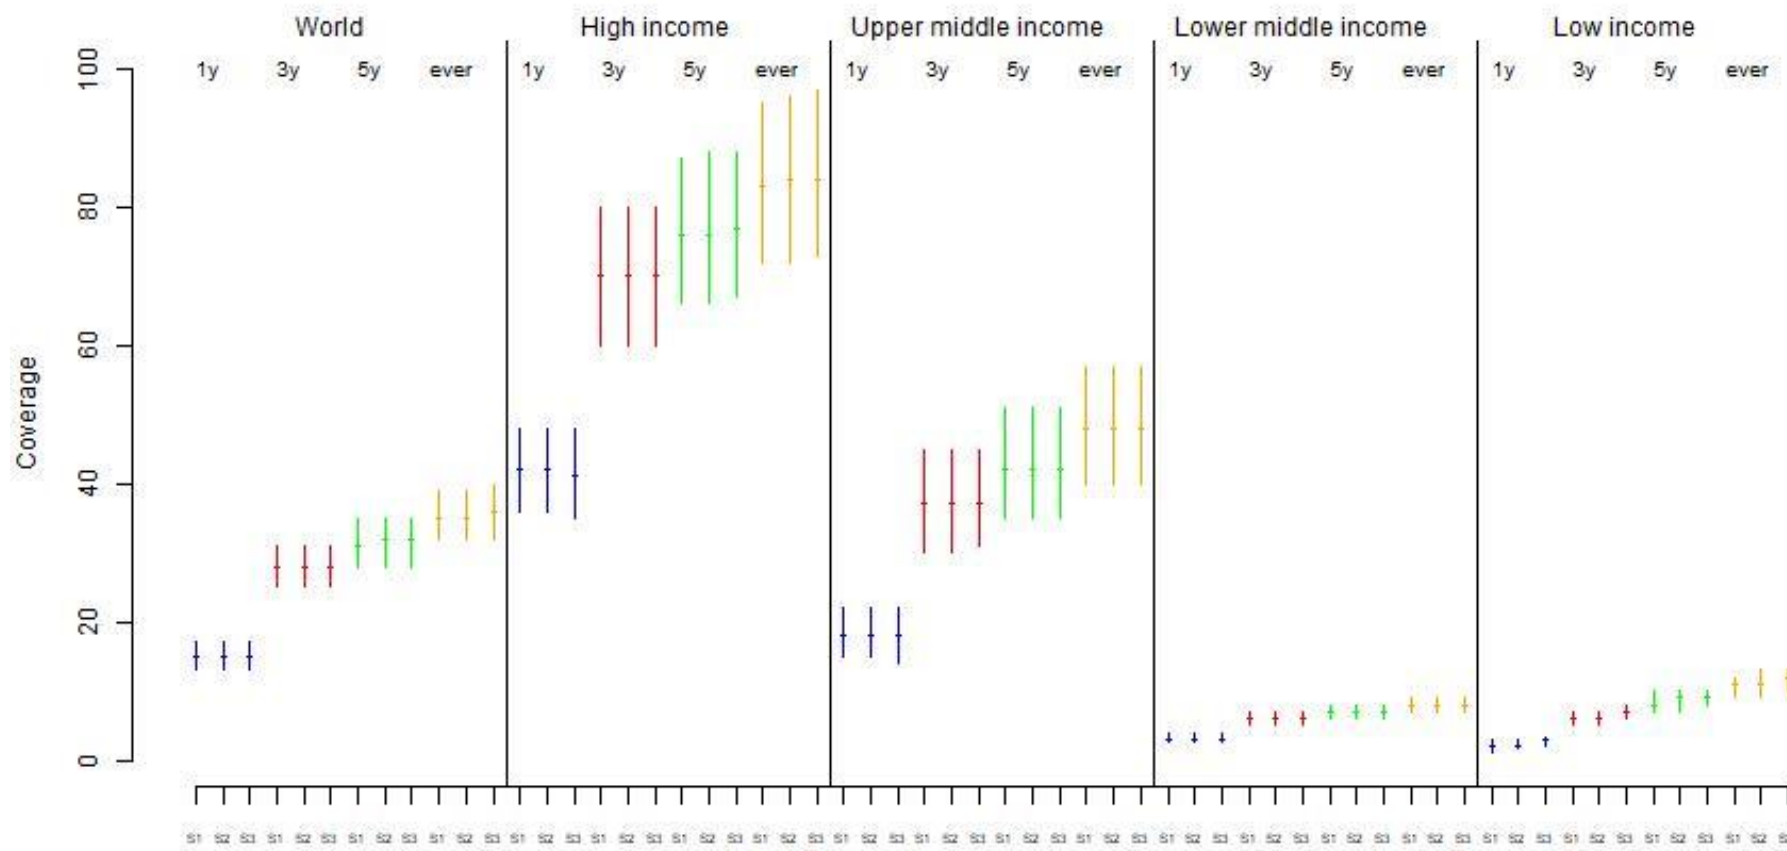

S1: Scenario 1; S2: Scenario 2; S3: Scenario 3.



**Table S7. Sensitivity analysis of the screening coverage estimates for women aged 30-49 years under different scenarios of income and region.**

|                                        | In the previous year<br>Coverage (%) |     | In the previous three years<br>Coverage (%) |     | In the previous five years<br>Coverage (%) |     | Ever in lifetime<br>Coverage (%) |     |
|----------------------------------------|--------------------------------------|-----|---------------------------------------------|-----|--------------------------------------------|-----|----------------------------------|-----|
|                                        | S1                                   | S2  | S1                                          | S2  | S1                                         | S2  | S1                               | S2  |
| <b>Income</b>                          |                                      |     |                                             |     |                                            |     |                                  |     |
| High-Income                            | 42%                                  | 42% | 70%                                         | 70% | 76%                                        | 76% | 83%                              | 83% |
| Low And Middle-Income                  | 10%                                  | 9%  | 20%                                         | 20% | 23%                                        | 23% | 27%                              | 26% |
| Upper Middle-Income                    | 18%                                  | 11% | 37%                                         | 37% | 42%                                        | 42% | 48%                              | 47% |
| Lower Middle-Income                    | 3%                                   | 3%  | 6%                                          | 6%  | 7%                                         | 8%  | 8%                               | 10% |
| Low Income                             | 2%                                   | 0%  | 6%                                          | 3%  | 8%                                         | 5%  | 11%                              | 8%  |
| <b>SDG Regions</b>                     |                                      |     |                                             |     |                                            |     |                                  |     |
| Sub-Saharan Africa                     | 3%                                   | 1%  | 8%                                          | 10% | 11%                                        | 13% | 14%                              | 17% |
| Northern Africa & Western Asia         | 8%                                   | 7%  | 17%                                         | 18% | 24%                                        | 25% | 28%                              | 27% |
| Central & Southern Asia <sup>£</sup>   | 3%                                   | 1%  | 5%                                          | 4%  | 6%                                         | 5%  | 7%                               | 6%  |
| Eastern & South-Eastern Asia           | 12%                                  | 17% | 26%                                         | 27% | 29%                                        | 29% | 32%                              | 31% |
| Latin America & Caribbean              | 29%                                  | 29% | 54%                                         | 52% | 61%                                        | 59% | 73%                              | 72% |
| Oceania (Excl. AUS/NZL)                | 2%                                   | 5%  | 6%                                          | 7%  | 8%                                         | 9%  | 10%                              | 11% |
| Australia & New Zealand <sup>£</sup>   | 26%                                  | 27% | 71%                                         | 68% | 84%                                        | 82% | 95%                              | 95% |
| Europe & Northern America <sup>¥</sup> | 43%                                  | 43% | 73%                                         | 74% | 81%                                        | 81% | 88%                              | 89% |

S: Scenario; SDG: Sustainable Development Goals.

Scenario 1 includes data among all regions. Scenario 2 includes, for each row in the table, data for countries corresponding to each income level or SGD region.

<sup>£</sup> Imputations for screening coverage intervals in the previous 3 and 5 years in Steps 3a and 4 (PMM Method) could not be estimated because of collinearity. Linear interpolation was used. <sup>€</sup> Imputations for screening coverage interval at once in lifetime could not be estimated in Steps 3a and 4 (PMM Method) because only 2 countries are included. Imputations of the final analysis were used. <sup>¥</sup> Imputations for Albania (ages 20-39 years) could not be estimated in Step 3c because no countries with similar characteristics were included. Imputations of the final analysis were used.

Figure S7.1. Screening coverage estimates for women aged 30-49 years under different scenarios of income level.

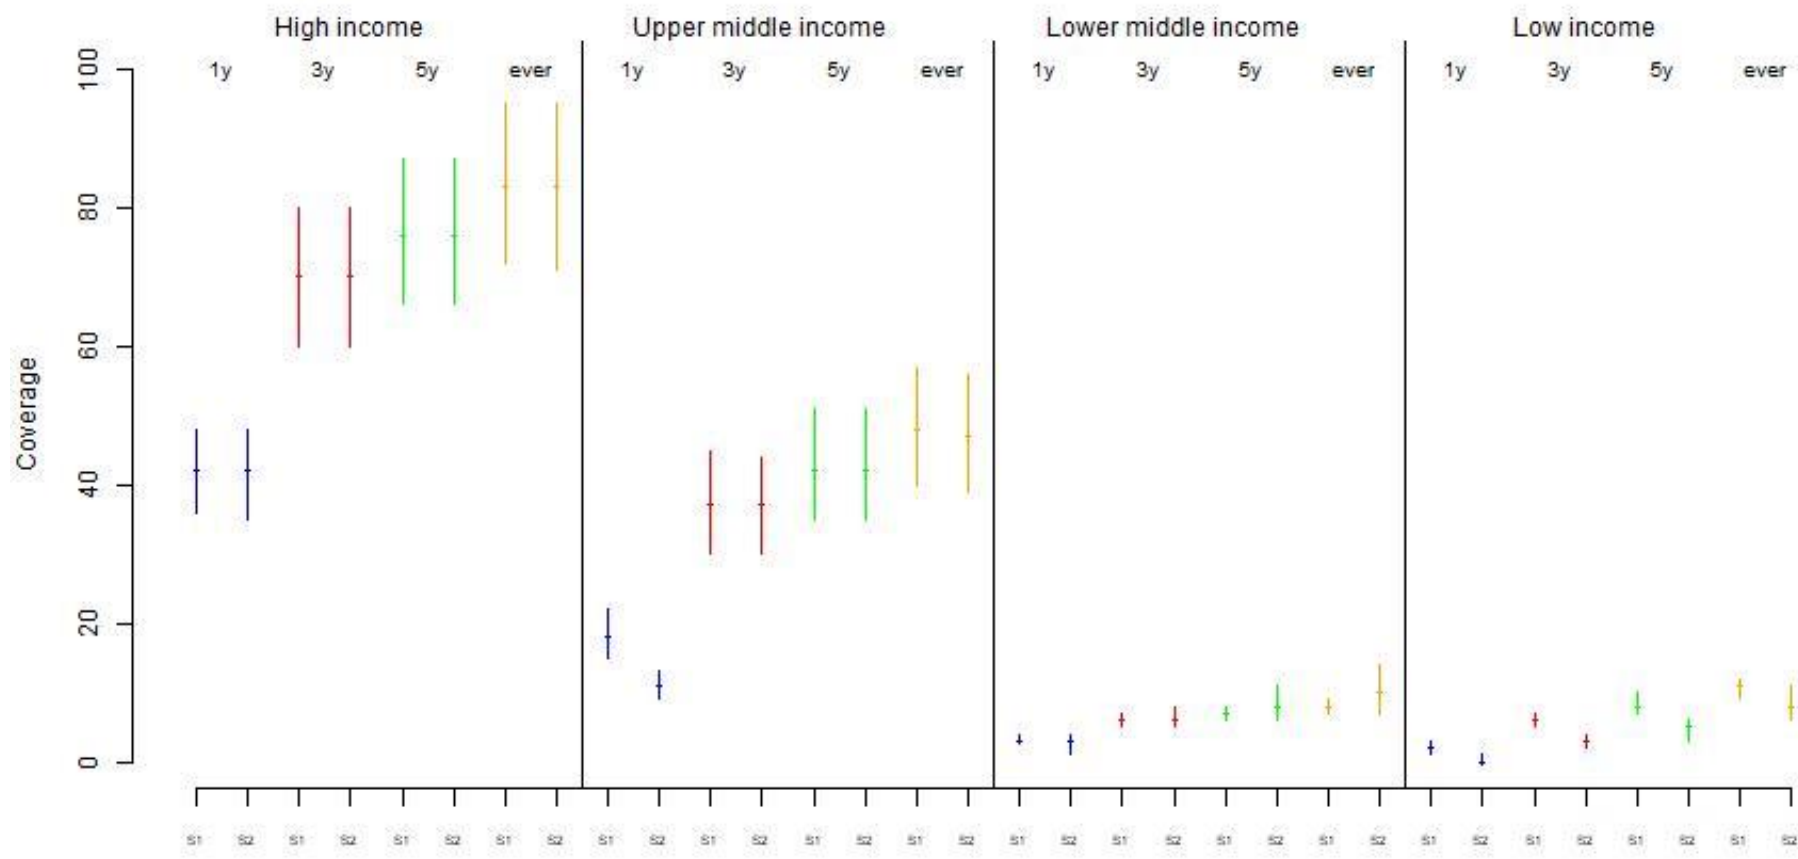

S1: Scenario 1; S2: Scenario 2.

Figure S7.2. Screening coverage estimates for women aged 30-49 years under different scenarios of SDG regions.

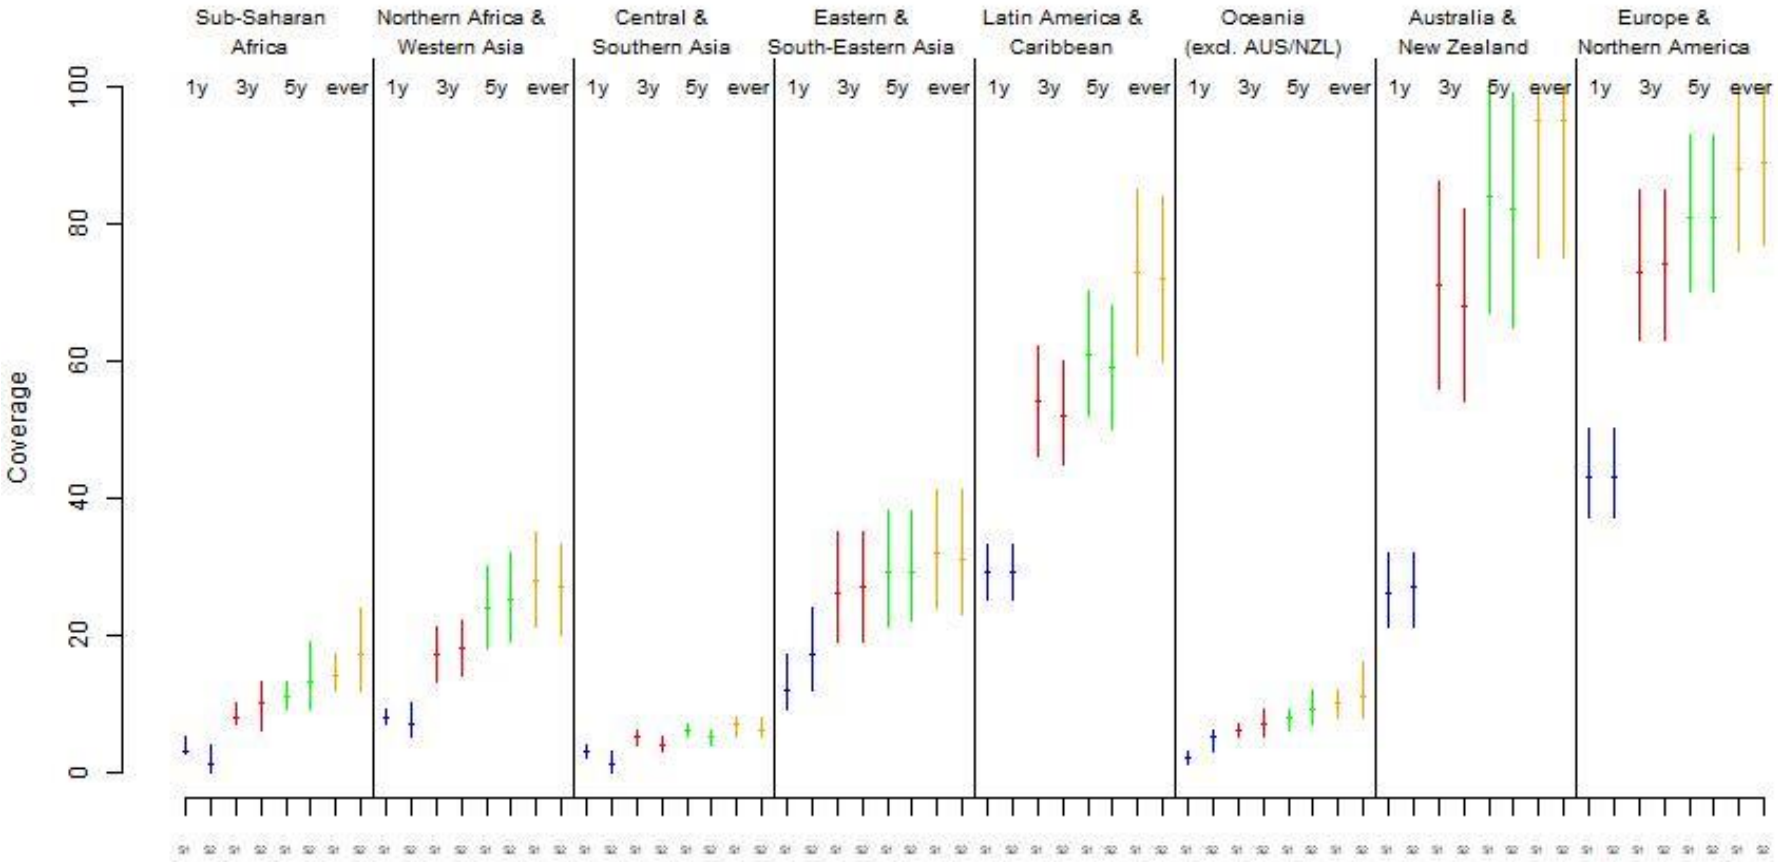

S1: Scenario 1; S2: Scenario 2.

**Table S8. Sensitivity analysis of screening coverage estimates for women aged 30-49 years under different missing imputation algorithms.**

**Legend of scenarios under different missing imputation algorithms:**

| Steps                                   | Scenario 1 | Scenario 2      | Scenario 3         | Scenario 4         | Scenario 5              |
|-----------------------------------------|------------|-----------------|--------------------|--------------------|-------------------------|
| <b>Countries with data</b>              |            |                 |                    |                    |                         |
| Step 1: Modification of aggregated data | X          | Aggregated data | X                  | X                  | X                       |
| Step 2: Linear interpolation            | X          | X               | PMM (with step 3a) | X                  | X                       |
| Step 3a: PMM                            | X          | X               | X                  | X                  | X                       |
| Step 3b: Assignment                     | X          | X               | X                  | PMM (with step 3a) | X                       |
| Step 3c: Ponderation                    | X          | X               | X                  | X                  | New PMM (after step 3b) |
| <b>Countries without data</b>           |            |                 |                    |                    |                         |
| Step 4: PMM                             | X          | X               | X                  | X                  | X                       |

PMM: Predictive Mean Matching.

|                                           | In the previous year<br>Coverage (%) |     |     |     |     | In the previous three years<br>Coverage (%) |     |     |     |     | In the previous five years<br>Coverage (%) |     |     |     |     | Ever in lifetime<br>Coverage (%) |     |     |     |     |
|-------------------------------------------|--------------------------------------|-----|-----|-----|-----|---------------------------------------------|-----|-----|-----|-----|--------------------------------------------|-----|-----|-----|-----|----------------------------------|-----|-----|-----|-----|
|                                           | S1                                   | S2  | S3  | S4  | S5  | S1                                          | S2  | S3  | S4  | S5  | S1                                         | S2  | S3  | S4  | S5  | S1                               | S2  | S3  | S4  | S5  |
| <b>World</b>                              | 15%                                  | 15% | 15% | 15% | 15% | 28%                                         | 28% | 28% | 28% | 28% | 31%                                        | 31% | 32% | 31% | 31% | 35%                              | 35% | 36% | 35% | 35% |
| <b>Income</b>                             |                                      |     |     |     |     |                                             |     |     |     |     |                                            |     |     |     |     |                                  |     |     |     |     |
| High-Income                               | 42%                                  | 42% | 42% | 42% | 42% | 70%                                         | 70% | 70% | 70% | 70% | 76%                                        | 76% | 77% | 76% | 76% | 83%                              | 83% | 84% | 83% | 83% |
| Low And Middle-Income                     | 10%                                  | 10% | 10% | 10% | 10% | 20%                                         | 20% | 21% | 20% | 20% | 23%                                        | 23% | 24% | 23% | 23% | 27%                              | 27% | 27% | 27% | 27% |
| Upper Middle-Income                       | 18%                                  | 19% | 18% | 18% | 18% | 37%                                         | 37% | 37% | 37% | 37% | 42%                                        | 42% | 43% | 42% | 42% | 48%                              | 47% | 47% | 48% | 48% |
| Lower Middle-Income                       | 3%                                   | 3%  | 3%  | 3%  | 3%  | 6%                                          | 6%  | 6%  | 6%  | 6%  | 7%                                         | 7%  | 8%  | 7%  | 7%  | 8%                               | 8%  | 9%  | 8%  | 8%  |
| Low-Income                                | 2%                                   | 2%  | 2%  | 2%  | 2%  | 6%                                          | 6%  | 8%  | 6%  | 6%  | 8%                                         | 8%  | 11% | 8%  | 9%  | 11%                              | 11% | 15% | 11% | 11% |
| <b>SDG Regions and Subregions</b>         |                                      |     |     |     |     |                                             |     |     |     |     |                                            |     |     |     |     |                                  |     |     |     |     |
| <b>Sub-Saharan Africa</b>                 | 3%                                   | 4%  | 3%  | 4%  | 3%  | 8%                                          | 8%  | 11% | 8%  | 8%  | 11%                                        | 11% | 15% | 11% | 11% | 14%                              | 14% | 19% | 14% | 14% |
| Eastern Africa                            | 2%                                   | 2%  | 1%  | 2%  | 2%  | 6%                                          | 5%  | 6%  | 6%  | 6%  | 8%                                         | 8%  | 9%  | 8%  | 8%  | 10%                              | 10% | 12% | 10% | 10% |
| Middle Africa                             | 2%                                   | 2%  | 1%  | 2%  | 2%  | 7%                                          | 7%  | 7%  | 7%  | 7%  | 9%                                         | 10% | 10% | 9%  | 9%  | 12%                              | 13% | 12% | 12% | 12% |
| Southern Africa                           | 21%                                  | 25% | 21% | 22% | 21% | 33%                                         | 33% | 33% | 33% | 33% | 42%                                        | 42% | 42% | 42% | 42% | 50%                              | 50% | 50% | 50% | 50% |
| Western Africa                            | 2%                                   | 2%  | 2%  | 2%  | 2%  | 6%                                          | 6%  | 12% | 6%  | 6%  | 8%                                         | 8%  | 17% | 8%  | 8%  | 11%                              | 11% | 23% | 11% | 11% |
| <b>Northern Africa &amp; Western Asia</b> | 8%                                   | 8%  | 7%  | 8%  | 8%  | 17%                                         | 16% | 16% | 17% | 17% | 24%                                        | 23% | 24% | 24% | 24% | 28%                              | 27% | 25% | 28% | 28% |
| Northern Africa                           | 4%                                   | 4%  | 4%  | 4%  | 4%  | 7%                                          | 7%  | 7%  | 7%  | 7%  | 8%                                         | 8%  | 8%  | 8%  | 8%  | 8%                               | 8%  | 9%  | 8%  | 8%  |
| Western Asia                              | 11%                                  | 10% | 10% | 11% | 11% | 25%                                         | 24% | 24% | 25% | 25% | 38%                                        | 36% | 37% | 38% | 38% | 44%                              | 43% | 40% | 44% | 44% |
| <b>Central &amp; Southern Asia</b>        | 3%                                   | 3%  | 3%  | 3%  | 3%  | 5%                                          | 5%  | 5%  | 5%  | 5%  | 6%                                         | 6%  | 6%  | 6%  | 6%  | 7%                               | 7%  | 7%  | 7%  | 7%  |
| Central Asia                              | 7%                                   | 7%  | 5%  | 8%  | 7%  | 18%                                         | 18% | 17% | 18% | 18% | 29%                                        | 28% | 28% | 29% | 29% | 33%                              | 33% | 33% | 33% | 33% |
| Southern Asia                             | 3%                                   | 3%  | 3%  | 3%  | 3%  | 4%                                          | 4%  | 4%  | 4%  | 4%  | 5%                                         | 5%  | 5%  | 5%  | 5%  | 6%                               | 5%  | 6%  | 6%  | 6%  |
| <b>Eastern &amp; South-Eastern Asia</b>   | 12%                                  | 13% | 12% | 12% | 12% | 26%                                         | 26% | 27% | 26% | 26% | 29%                                        | 29% | 29% | 29% | 29% | 32%                              | 31% | 32% | 32% | 32% |
| Eastern Asia                              | 15%                                  | 16% | 15% | 15% | 15% | 31%                                         | 31% | 31% | 31% | 31% | 33%                                        | 33% | 33% | 33% | 33% | 35%                              | 35% | 36% | 35% | 35% |
| South-Eastern Asia                        | 6%                                   | 6%  | 5%  | 6%  | 6%  | 14%                                         | 14% | 14% | 14% | 14% | 19%                                        | 19% | 19% | 19% | 19% | 22%                              | 22% | 21% | 22% | 22% |
| <b>Latin America &amp; Caribbean</b>      | 29%                                  | 29% | 28% | 29% | 29% | 54%                                         | 54% | 54% | 54% | 54% | 61%                                        | 61% | 63% | 60% | 61% | 73%                              | 73% | 74% | 73% | 73% |

|                                      |            |            |            |            |            |            |            |            |            |            |            |            |            |            |            |            |            |            |            |            |
|--------------------------------------|------------|------------|------------|------------|------------|------------|------------|------------|------------|------------|------------|------------|------------|------------|------------|------------|------------|------------|------------|------------|
| Caribbean                            | 35%        | 35%        | 35%        | 35%        | 36%        | 58%        | 58%        | 58%        | 58%        | 60%        | 64%        | 64%        | 63%        | 64%        | 66%        | 69%        | 69%        | 69%        | 69%        | 72%        |
| Central America                      | 38%        | 38%        | 38%        | 38%        | 38%        | 66%        | 67%        | 65%        | 66%        | 66%        | 75%        | 76%        | 74%        | 74%        | 75%        | 85%        | 85%        | 86%        | 85%        | 85%        |
| South America                        | 25%        | 24%        | 24%        | 25%        | 25%        | 48%        | 48%        | 49%        | 48%        | 48%        | 55%        | 54%        | 58%        | 55%        | 55%        | 68%        | 68%        | 69%        | 68%        | 68%        |
| <b>Oceania (Excl. AUS/NZL)</b>       | <b>2%</b>  | <b>3%</b>  | <b>2%</b>  | <b>2%</b>  | <b>2%</b>  | <b>6%</b>  | <b>6%</b>  | <b>6%</b>  | <b>6%</b>  | <b>6%</b>  | <b>8%</b>  | <b>8%</b>  | <b>7%</b>  | <b>8%</b>  | <b>8%</b>  | <b>10%</b> | <b>10%</b> | <b>9%</b>  | <b>10%</b> | <b>10%</b> |
| Melanesia                            | 1%         | 2%         | 1%         | 1%         | 1%         | 3%         | 4%         | 4%         | 3%         | 3%         | 5%         | 5%         | 5%         | 5%         | 5%         | 7%         | 7%         | 6%         | 7%         | 7%         |
| Micronesia                           | 12%        | 12%        | 9%         | 12%        | 12%        | 21%        | 21%        | 19%        | 21%        | 21%        | 24%        | 24%        | 23%        | 25%        | 24%        | 29%        | 29%        | 29%        | 29%        | 29%        |
| Polynesia                            | 13%        | 13%        | 10%        | 13%        | 13%        | 34%        | 34%        | 31%        | 34%        | 34%        | 43%        | 42%        | 38%        | 43%        | 43%        | 51%        | 50%        | 44%        | 51%        | 51%        |
| <b>Australia &amp; New Zealand</b>   | <b>26%</b> | <b>27%</b> | <b>26%</b> | <b>26%</b> | <b>26%</b> | <b>71%</b> | <b>70%</b> | <b>68%</b> | <b>71%</b> | <b>71%</b> | <b>84%</b> | <b>84%</b> | <b>81%</b> | <b>84%</b> | <b>84%</b> | <b>95%</b> | <b>95%</b> | <b>90%</b> | <b>95%</b> | <b>95%</b> |
| <b>Europe &amp; Northern America</b> | <b>43%</b> | <b>43%</b> | <b>43%</b> | <b>43%</b> | <b>43%</b> | <b>73%</b> | <b>74%</b> | <b>74%</b> | <b>73%</b> | <b>73%</b> | <b>81%</b> | <b>81%</b> | <b>81%</b> | <b>81%</b> | <b>81%</b> | <b>88%</b> | <b>89%</b> | <b>89%</b> | <b>88%</b> | <b>88%</b> |
| Eastern Europe                       | 39%        | 38%        | 37%        | 39%        | 39%        | 69%        | 70%        | 72%        | 69%        | 69%        | 77%        | 79%        | 79%        | 77%        | 77%        | 85%        | 87%        | 88%        | 85%        | 85%        |
| Northern Europe                      | 34%        | 34%        | 33%        | 33%        | 34%        | 69%        | 69%        | 69%        | 69%        | 69%        | 80%        | 80%        | 80%        | 80%        | 80%        | 91%        | 91%        | 92%        | 91%        | 91%        |
| Southern Europe                      | 43%        | 44%        | 42%        | 44%        | 43%        | 75%        | 75%        | 75%        | 75%        | 75%        | 82%        | 82%        | 82%        | 82%        | 82%        | 89%        | 88%        | 88%        | 89%        | 89%        |
| Western Europe                       | 51%        | 51%        | 53%        | 51%        | 51%        | 76%        | 76%        | 76%        | 76%        | 76%        | 84%        | 84%        | 83%        | 84%        | 84%        | 94%        | 94%        | 94%        | 94%        | 94%        |
| Northern America                     | 47%        | 47%        | 47%        | 47%        | 47%        | 77%        | 77%        | 77%        | 77%        | 77%        | 82%        | 82%        | 82%        | 82%        | 82%        | 88%        | 88%        | 88%        | 88%        | 88%        |

S: Scenario; SDG: Sustainable Development Goals.

**Figure S8.1. Screening coverage estimates for women aged 30-49 years under different missing imputation algorithms, worldwide and by income level.**

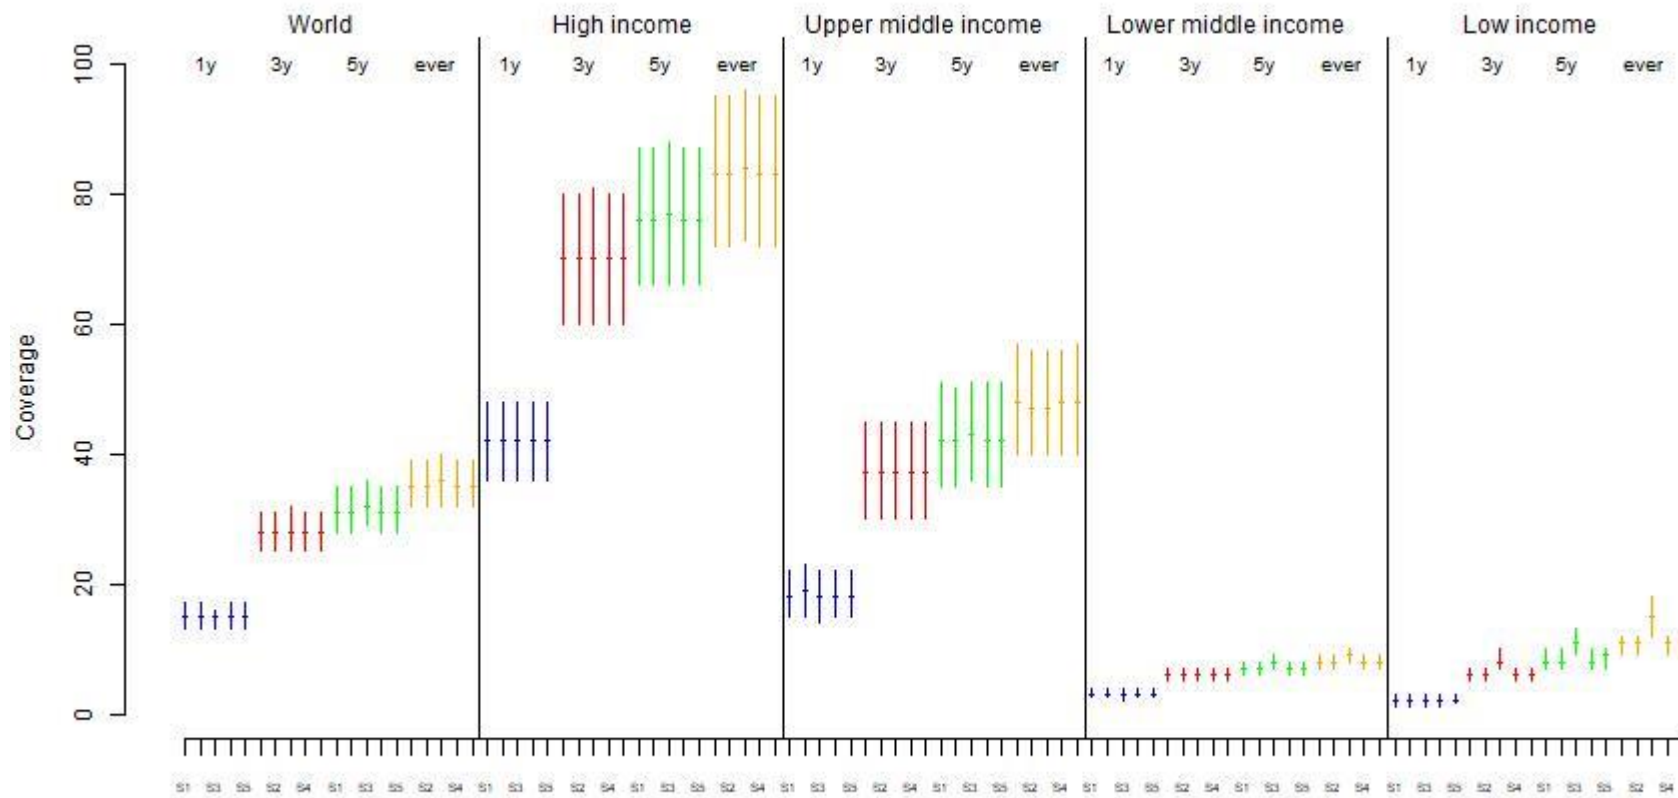

S1: Scenario 1; S2: Scenario 2; S3: Scenario 3; S4: Scenario 4; S5: Scenario 5.

**Table S9. Sensitivity analysis of screening coverage estimates for women aged 30-49 years under different assumptions of screening coverages (from 0% to 100%) for missing values.**

**Legend of scenarios under assumptions of screening coverages (from 0% to 100%) for missing values:**

| Screening interval   | Scenario 1 | Scenario 2 | Scenario 3 | Scenario 4 | Scenario 5 |
|----------------------|------------|------------|------------|------------|------------|
| Previous year        | Algorithm  | 0%         | 25%        | 50%        | 75%        |
| Previous three years | Algorithm  | 0%         | 25%        | 50%        | 100%       |
| Previous five years  | Algorithm  | 0%         | 25%        | 50%        | 100%       |
| Ever in lifetime     | Algorithm  | 0%         | 25%        | 50%        | 100%       |

\*\* Only among countries without data (38 countries)

|                                           | In the previous year<br>Coverage (%) |            |            |            |            | In the previous three years<br>Coverage (%) |            |            |            |            | In the previous five years<br>Coverage (%) |            |            |            |            | Ever in lifetime<br>Coverage (%) |            |            |            |            |
|-------------------------------------------|--------------------------------------|------------|------------|------------|------------|---------------------------------------------|------------|------------|------------|------------|--------------------------------------------|------------|------------|------------|------------|----------------------------------|------------|------------|------------|------------|
|                                           | S1                                   | S2         | S3         | S4         | S5         | S1                                          | S2         | S3         | S4         | S5         | S1                                         | S2         | S3         | S4         | S5         | S1                               | S2         | S3         | S4         | S5         |
| <b>World</b>                              | <b>15%</b>                           | <b>15%</b> | <b>16%</b> | <b>18%</b> | <b>19%</b> | <b>28%</b>                                  | <b>27%</b> | <b>29%</b> | <b>30%</b> | <b>33%</b> | <b>31%</b>                                 | <b>30%</b> | <b>32%</b> | <b>34%</b> | <b>37%</b> | <b>35%</b>                       | <b>34%</b> | <b>36%</b> | <b>37%</b> | <b>41%</b> |
| <b>Income</b>                             |                                      |            |            |            |            |                                             |            |            |            |            |                                            |            |            |            |            |                                  |            |            |            |            |
| High-Income                               | 42%                                  | 42%        | 42%        | 42%        | 42%        | 70%                                         | 69%        | 69%        | 70%        | 70%        | 76%                                        | 76%        | 76%        | 76%        | 76%        | 83%                              | 83%        | 83%        | 83%        | 83%        |
| Low And Middle-Income                     | 10%                                  | 10%        | 12%        | 14%        | 15%        | 20%                                         | 19%        | 21%        | 23%        | 27%        | 23%                                        | 22%        | 24%        | 26%        | 30%        | 27%                              | 25%        | 27%        | 29%        | 33%        |
| Upper Middle-Income                       | 18%                                  | 18%        | 18%        | 19%        | 19%        | 37%                                         | 37%        | 37%        | 37%        | 38%        | 42%                                        | 42%        | 42%        | 42%        | 43%        | 48%                              | 47%        | 47%        | 48%        | 48%        |
| Lower Middle-Income                       | 3%                                   | 3%         | 5%         | 6%         | 8%         | 6%                                          | 5%         | 7%         | 8%         | 12%        | 7%                                         | 6%         | 8%         | 9%         | 13%        | 8%                               | 7%         | 9%         | 10%        | 14%        |
| Low-Income                                | 2%                                   | 0%         | 12%        | 24%        | 35%        | 6%                                          | 2%         | 13%        | 25%        | 48%        | 8%                                         | 2%         | 14%        | 26%        | 49%        | 11%                              | 3%         | 15%        | 27%        | 50%        |
| <b>SDG Regions and Subregions</b>         |                                      |            |            |            |            |                                             |            |            |            |            |                                            |            |            |            |            |                                  |            |            |            |            |
| <b>Sub-Saharan Africa</b>                 | <b>3%</b>                            | <b>3%</b>  | <b>13%</b> | <b>24%</b> | <b>35%</b> | <b>8%</b>                                   | <b>5%</b>  | <b>16%</b> | <b>27%</b> | <b>48%</b> | <b>11%</b>                                 | <b>7%</b>  | <b>17%</b> | <b>28%</b> | <b>50%</b> | <b>14%</b>                       | <b>8%</b>  | <b>19%</b> | <b>30%</b> | <b>52%</b> |
| Eastern Africa                            | 2%                                   | 2%         | 7%         | 13%        | 19%        | 6%                                          | 4%         | 10%        | 15%        | 27%        | 8%                                         | 6%         | 11%        | 17%        | 29%        | 10%                              | 8%         | 13%        | 19%        | 30%        |
| Middle Africa                             | 2%                                   | 0%         | 18%        | 35%        | 53%        | 7%                                          | 1%         | 19%        | 36%        | 71%        | 9%                                         | 2%         | 19%        | 37%        | 72%        | 12%                              | 2%         | 19%        | 37%        | 72%        |
| Southern Africa                           | 21%                                  | 21%        | 21%        | 21%        | 21%        | 33%                                         | 33%        | 33%        | 33%        | 33%        | 42%                                        | 42%        | 42%        | 42%        | 42%        | 50%                              | 50%        | 50%        | 50%        | 50%        |
| Western Africa                            | 2%                                   | 0%         | 17%        | 33%        | 50%        | 6%                                          | 1%         | 17%        | 34%        | 67%        | 8%                                         | 1%         | 18%        | 34%        | 67%        | 11%                              | 1%         | 18%        | 34%        | 67%        |
| <b>Northern Africa &amp; Western Asia</b> | <b>8%</b>                            | <b>8%</b>  | <b>9%</b>  | <b>11%</b> | <b>13%</b> | <b>17%</b>                                  | <b>16%</b> | <b>18%</b> | <b>20%</b> | <b>23%</b> | <b>24%</b>                                 | <b>23%</b> | <b>25%</b> | <b>27%</b> | <b>30%</b> | <b>28%</b>                       | <b>27%</b> | <b>28%</b> | <b>30%</b> | <b>34%</b> |
| Northern Africa                           | 4%                                   | 4%         | 5%         | 6%         | 7%         | 7%                                          | 7%         | 7%         | 8%         | 10%        | 8%                                         | 7%         | 8%         | 9%         | 10%        | 8%                               | 7%         | 8%         | 9%         | 11%        |
| Western Asia                              | 11%                                  | 11%        | 13%        | 16%        | 19%        | 25%                                         | 24%        | 27%        | 29%        | 34%        | 38%                                        | 37%        | 39%        | 42%        | 47%        | 44%                              | 43%        | 45%        | 48%        | 53%        |
| <b>Central &amp; Southern Asia</b>        | <b>3%</b>                            | <b>3%</b>  | <b>4%</b>  | <b>4%</b>  | <b>4%</b>  | <b>5%</b>                                   | <b>5%</b>  | <b>5%</b>  | <b>5%</b>  | <b>6%</b>  | <b>6%</b>                                  | <b>6%</b>  | <b>6%</b>  | <b>7%</b>  | <b>7%</b>  | <b>7%</b>                        | <b>6%</b>  | <b>7%</b>  | <b>7%</b>  | <b>8%</b>  |
| Central Asia                              | 7%                                   | 7%         | 7%         | 7%         | 7%         | 18%                                         | 18%        | 18%        | 18%        | 18%        | 29%                                        | 29%        | 29%        | 29%        | 29%        | 33%                              | 33%        | 33%        | 33%        | 33%        |
| Southern Asia                             | 3%                                   | 3%         | 3%         | 4%         | 4%         | 4%                                          | 4%         | 5%         | 5%         | 6%         | 5%                                         | 5%         | 5%         | 5%         | 6%         | 6%                               | 5%         | 6%         | 6%         | 7%         |
| <b>Eastern &amp; South-Eastern Asia</b>   | <b>12%</b>                           | <b>12%</b> | <b>13%</b> | <b>13%</b> | <b>14%</b> | <b>26%</b>                                  | <b>26%</b> | <b>26%</b> | <b>27%</b> | <b>28%</b> | <b>29%</b>                                 | <b>28%</b> | <b>29%</b> | <b>29%</b> | <b>30%</b> | <b>32%</b>                       | <b>31%</b> | <b>31%</b> | <b>32%</b> | <b>33%</b> |
| Eastern Asia                              | 15%                                  | 15%        | 15%        | 15%        | 16%        | 31%                                         | 30%        | 31%        | 31%        | 32%        | 33%                                        | 32%        | 33%        | 33%        | 34%        | 35%                              | 34%        | 35%        | 35%        | 36%        |
| South-Eastern Asia                        | 6%                                   | 6%         | 6%         | 7%         | 8%         | 14%                                         | 14%        | 15%        | 15%        | 16%        | 19%                                        | 18%        | 19%        | 20%        | 21%        | 22%                              | 22%        | 23%        | 23%        | 24%        |
| <b>Latin America &amp; Caribbean</b>      | <b>29%</b>                           | <b>28%</b> | <b>29%</b> | <b>30%</b> | <b>31%</b> | <b>54%</b>                                  | <b>52%</b> | <b>53%</b> | <b>54%</b> | <b>57%</b> | <b>61%</b>                                 | <b>58%</b> | <b>60%</b> | <b>61%</b> | <b>63%</b> | <b>73%</b>                       | <b>70%</b> | <b>71%</b> | <b>73%</b> | <b>75%</b> |
| Caribbean                                 | 35%                                  | 35%        | 35%        | 35%        | 35%        | 58%                                         | 57%        | 58%        | 58%        | 58%        | 64%                                        | 63%        | 64%        | 64%        | 64%        | 69%                              | 69%        | 69%        | 69%        | 69%        |
| Central America                           | 38%                                  | 37%        | 38%        | 39%        | 39%        | 66%                                         | 65%        | 65%        | 66%        | 67%        | 75%                                        | 73%        | 74%        | 75%        | 76%        | 85%                              | 83%        | 84%        | 85%        | 86%        |
| South America                             | 25%                                  | 23%        | 25%        | 26%        | 28%        | 48%                                         | 46%        | 47%        | 49%        | 52%        | 55%                                        | 52%        | 53%        | 55%        | 58%        | 68%                              | 65%        | 66%        | 68%        | 71%        |

|                                      |            |            |            |            |            |            |            |            |            |            |            |            |            |            |            |            |            |            |            |            |
|--------------------------------------|------------|------------|------------|------------|------------|------------|------------|------------|------------|------------|------------|------------|------------|------------|------------|------------|------------|------------|------------|------------|
| <b>Oceania (Excl. AUS/NZL)</b>       | <b>2%</b>  | <b>2%</b>  | <b>3%</b>  | <b>4%</b>  | <b>5%</b>  | <b>6%</b>  | <b>5%</b>  | <b>6%</b>  | <b>7%</b>  | <b>9%</b>  | <b>8%</b>  | <b>7%</b>  | <b>8%</b>  | <b>9%</b>  | <b>11%</b> | <b>10%</b> | <b>9%</b>  | <b>10%</b> | <b>11%</b> | <b>13%</b> |
| Melanesia                            | 1%         | 1%         | 1%         | 2%         | 3%         | 3%         | 3%         | 4%         | 4%         | 6%         | 5%         | 4%         | 5%         | 6%         | 7%         | 7%         | 7%         | 7%         | 8%         | 9%         |
| Micronesia                           | 12%        | 12%        | 12%        | 12%        | 12%        | 21%        | 21%        | 21%        | 21%        | 21%        | 24%        | 24%        | 24%        | 24%        | 24%        | 29%        | 29%        | 29%        | 29%        | 29%        |
| Polynesia                            | 13%        | 8%         | 16%        | 24%        | 33%        | 34%        | 25%        | 33%        | 41%        | 57%        | 43%        | 31%        | 39%        | 47%        | 64%        | 51%        | 37%        | 45%        | 53%        | 70%        |
| <b>Australia &amp; New Zealand</b>   | <b>26%</b> | <b>26%</b> | <b>26%</b> | <b>26%</b> | <b>26%</b> | <b>71%</b> | <b>71%</b> | <b>71%</b> | <b>71%</b> | <b>71%</b> | <b>84%</b> | <b>84%</b> | <b>84%</b> | <b>84%</b> | <b>84%</b> | <b>95%</b> | <b>95%</b> | <b>95%</b> | <b>95%</b> | <b>95%</b> |
| <b>Europe &amp; Northern America</b> | <b>43%</b> | <b>43%</b> | <b>43%</b> | <b>43%</b> | <b>44%</b> | <b>73%</b> | <b>73%</b> | <b>73%</b> | <b>73%</b> | <b>74%</b> | <b>81%</b> | <b>81%</b> | <b>81%</b> | <b>81%</b> | <b>81%</b> | <b>88%</b> | <b>88%</b> | <b>88%</b> | <b>88%</b> | <b>88%</b> |
| Eastern Europe                       | 39%        | 39%        | 39%        | 39%        | 39%        | 69%        | 69%        | 69%        | 69%        | 69%        | 77%        | 77%        | 77%        | 77%        | 77%        | 85%        | 85%        | 85%        | 85%        | 85%        |
| Northern Europe                      | 34%        | 34%        | 34%        | 34%        | 34%        | 69%        | 69%        | 69%        | 69%        | 69%        | 80%        | 80%        | 80%        | 80%        | 80%        | 91%        | 91%        | 91%        | 91%        | 91%        |
| Southern Europe                      | 43%        | 43%        | 43%        | 44%        | 44%        | 75%        | 74%        | 74%        | 75%        | 76%        | 82%        | 81%        | 81%        | 82%        | 83%        | 89%        | 87%        | 88%        | 88%        | 89%        |
| Western Europe                       | 51%        | 51%        | 51%        | 51%        | 51%        | 76%        | 76%        | 76%        | 76%        | 76%        | 84%        | 84%        | 84%        | 84%        | 84%        | 94%        | 94%        | 94%        | 94%        | 94%        |
| Northern America                     | 47%        | 47%        | 47%        | 47%        | 47%        | 77%        | 77%        | 77%        | 77%        | 77%        | 82%        | 82%        | 82%        | 82%        | 82%        | 88%        | 88%        | 88%        | 88%        | 88%        |

S: Scenario; SDG: Sustainable Development Goals.



**Figure S9.1. Screening coverage estimates for women aged 30-49 years under different assumptions of screening coverages (from 0% to 100%) for missing values, worldwide and by income level.**

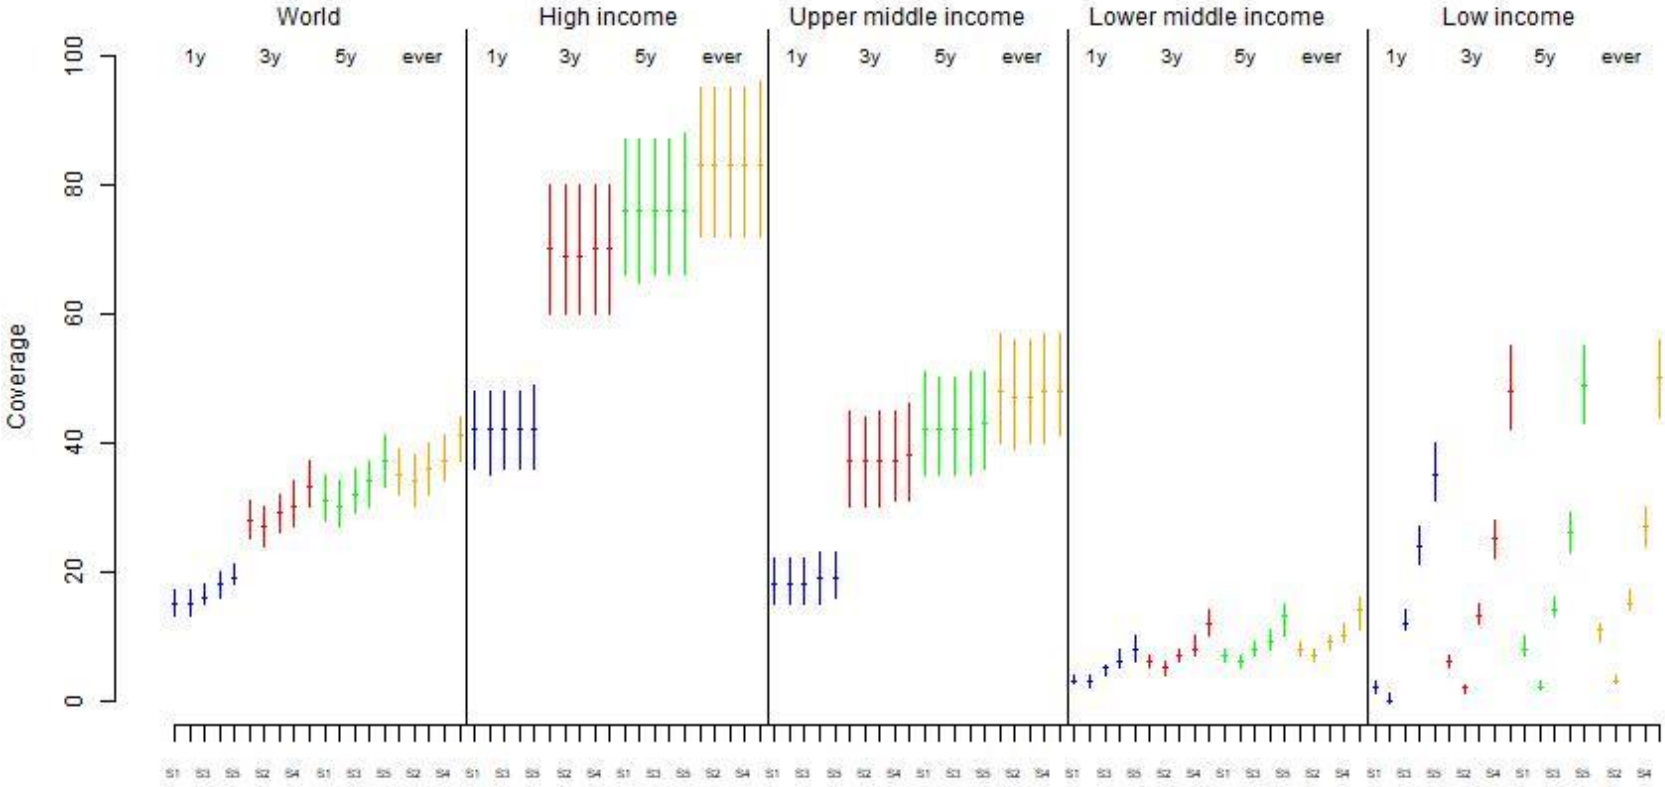

S1: Scenario 1; S2: Scenario 2; S3: Scenario 3; S4: Scenario 4; S5: Scenario 5.

**Table S10. Estimates of cervical cancer screening coverage in women aged 25-65 years by 2019.**

| Area                                      | In the previous year |                 | In the previous three years |                 | In the previous five years |                 | Ever in lifetime |                  |
|-------------------------------------------|----------------------|-----------------|-----------------------------|-----------------|----------------------------|-----------------|------------------|------------------|
|                                           | %                    | (95% CI)        | %                           | (95% CI)        | %                          | (95% CI)        | %                | (95% CI)         |
| <b>World</b>                              | <b>14%</b>           | <b>(13-15%)</b> | <b>27%</b>                  | <b>(25-29%)</b> | <b>31%</b>                 | <b>(28-33%)</b> | <b>35%</b>       | <b>(32-38%)</b>  |
| <b>Income</b>                             |                      |                 |                             |                 |                            |                 |                  |                  |
| High income                               | 38%                  | (34-42%)        | 66%                         | (59-72%)        | 73%                        | (66-80%)        | 83%              | (75-91%)         |
| Low and middle income                     | 9%                   | (8-10%)         | 19%                         | (17-21%)        | 22%                        | (20-25%)        | 26%              | (23-28%)         |
| Upper middle income                       | 16%                  | (14-19%)        | 34%                         | (30-39%)        | 39%                        | (34-44%)        | 45%              | (39-50%)         |
| Lower middle income                       | 3%                   | (3-3%)          | 5%                          | (5-6%)          | 6%                         | (6-7%)          | 8%               | (7-9%)           |
| Low income                                | 2%                   | (1-2%)          | 6%                          | (5-7%)          | 8%                         | (7-9%)          | 10%              | (9-11%)          |
| <b>SGD regions and subregions</b>         |                      |                 |                             |                 |                            |                 |                  |                  |
| <b>Sub-Saharan Africa</b>                 | <b>3%</b>            | <b>(2-4%)</b>   | <b>8%</b>                   | <b>(7-9%)</b>   | <b>10%</b>                 | <b>(9-12%)</b>  | <b>13%</b>       | <b>(11-15%)</b>  |
| Eastern Africa                            | 2%                   | (1-2%)          | 5%                          | (4-6%)          | 7%                         | (6-8%)          | 9%               | (8-11%)          |
| Middle Africa                             | 2%                   | (1-3%)          | 7%                          | (5-9%)          | 9%                         | (7-12%)         | 12%              | (9-15%)          |
| Southern Africa                           | 18%                  | (13-26%)        | 28%                         | (20-37%)        | 35%                        | (25-46%)        | 43%              | (31-56%)         |
| Western Africa                            | 1%                   | (1-2%)          | 6%                          | (4-8%)          | 8%                         | (6-11%)         | 10%              | (8-14%)          |
| <b>Northern Africa &amp; Western Asia</b> | <b>7%</b>            | <b>(6-8%)</b>   | <b>16%</b>                  | <b>(13-18%)</b> | <b>23%</b>                 | <b>(18-27%)</b> | <b>27%</b>       | <b>(22-32%)</b>  |
| Northern Africa                           | 4%                   | (3-5%)          | 7%                          | (6-7%)          | 7%                         | (6-8%)          | 8%               | (7-9%)           |
| Western Asia                              | 10%                  | (8-12%)         | 23%                         | (19-29%)        | 36%                        | (28-45%)        | 43%              | (34-54%)         |
| <b>Central &amp; Southern Asia</b>        | <b>3%</b>            | <b>(2-4%)</b>   | <b>4%</b>                   | <b>(4-5%)</b>   | <b>5%</b>                  | <b>(4-6%)</b>   | <b>6%</b>        | <b>(5-7%)</b>    |
| Central Asia                              | 7%                   | (5-9%)          | 17%                         | (15-20%)        | 28%                        | (24-32%)        | 32%              | (28-37%)         |
| Southern Asia                             | 3%                   | (2-3%)          | 4%                          | (3-4%)          | 4%                         | (3-5%)          | 5%               | (4-6%)           |
| <b>Eastern &amp; South-Eastern Asia</b>   | <b>11%</b>           | <b>(8-13%)</b>  | <b>24%</b>                  | <b>(19-29%)</b> | <b>26%</b>                 | <b>(21-32%)</b> | <b>29%</b>       | <b>(23-35%)</b>  |
| Eastern Asia                              | 13%                  | (9-16%)         | 28%                         | (21-34%)        | 29%                        | (23-36%)        | 32%              | (25-39%)         |
| South-Eastern Asia                        | 5%                   | (4-6%)          | 13%                         | (11-15%)        | 17%                        | (15-20%)        | 21%              | (18-24%)         |
| <b>Latin America &amp; Caribbean</b>      | <b>28%</b>           | <b>(25-31%)</b> | <b>52%</b>                  | <b>(47-58%)</b> | <b>59%</b>                 | <b>(53-66%)</b> | <b>72%</b>       | <b>(64-81%)</b>  |
| Caribbean                                 | 33%                  | (28-39%)        | 56%                         | (47-65%)        | 63%                        | (53-72%)        | 68%              | (59-79%)         |
| Central America                           | 37%                  | (29-45%)        | 64%                         | (51-79%)        | 74%                        | (58-90%)        | 84%              | (66-100%)        |
| South America                             | 24%                  | (21-27%)        | 47%                         | (42-53%)        | 53%                        | (47-60%)        | 68%              | (59-78%)         |
| <b>Oceania (excl. AUS/NZL)</b>            | <b>2%</b>            | <b>(1-3%)</b>   | <b>5%</b>                   | <b>(5-6%)</b>   | <b>7%</b>                  | <b>(6-8%)</b>   | <b>10%</b>       | <b>(9-11%)</b>   |
| Melanesia                                 | 1%                   | (0.0-2%)        | 3%                          | (2-4%)          | 4%                         | (4-5%)          | 7%               | (6-8%)           |
| Micronesia                                | 11%                  | (9-13%)         | 19%                         | (17-21%)        | 23%                        | (21-25%)        | 27%              | (25-29%)         |
| Polynesia                                 | 12%                  | (9-15%)         | 32%                         | (26-39%)        | 40%                        | (32-49%)        | 49%              | (39-60%)         |
| <b>Australia &amp; New Zealand</b>        | <b>27%</b>           | <b>(23-31%)</b> | <b>71%</b>                  | <b>(61-82%)</b> | <b>84%</b>                 | <b>(72-97%)</b> | <b>95%</b>       | <b>(81-100%)</b> |
| <b>Europe &amp; Northern America</b>      | <b>40%</b>           | <b>(35-44%)</b> | <b>69%</b>                  | <b>(62-76%)</b> | <b>77%</b>                 | <b>(69-85%)</b> | <b>87%</b>       | <b>(78-96%)</b>  |
| Eastern Europe                            | 36%                  | (30-42%)        | 66%                         | (56-76%)        | 75%                        | (63-87%)        | 84%              | (71-97%)         |
| Northern Europe                           | 28%                  | (22-34%)        | 62%                         | (50-73%)        | 74%                        | (62-88%)        | 88%              | (73-100%)        |
| Southern Europe                           | 40%                  | (34-47%)        | 71%                         | (60-82%)        | 79%                        | (68-91%)        | 87%              | (75-100%)        |
| Western Europe                            | 46%                  | (39-54%)        | 71%                         | (61-81%)        | 81%                        | (70-93%)        | 93%              | (81-100%)        |
| Northern America                          | 42%                  | (32-53%)        | 72%                         | (55-89%)        | 78%                        | (60-97%)        | 87%              | (67-100%)        |
| <b>WHO region</b>                         |                      |                 |                             |                 |                            |                 |                  |                  |
| AFRO                                      | 3%                   | (3-4%)          | 8%                          | (7-9%)          | 11%                        | (9-12%)         | 13%              | (12-15%)         |
| EURO                                      | 33%                  | (30-36%)        | 61%                         | (56-66%)        | 72%                        | (66-78%)        | 82%              | (76-89%)         |
| EMRO                                      | 6%                   | (5-8%)          | 9%                          | (8-11%)         | 11%                        | (9-13%)         | 13%              | (11-15%)         |
| AMRO                                      | 33%                  | (29-38%)        | 59%                         | (52-67%)        | 66%                        | (58-75%)        | 78%              | (68-88%)         |
| SEARO                                     | 2%                   | (2-3%)          | 5%                          | (4-5%)          | 6%                         | (5-7%)          | 7%               | (6-8%)           |
| WPRO                                      | 12%                  | (9-15%)         | 26%                         | (21-33%)        | 28%                        | (22-35%)        | 31%              | (25-38%)         |

CI: Confidence Interval, SDG: Sustainable Development Goals, AUS/NZL: Australia and New Zealand. The WHO regions include the African Region (AFRO), the European Region (EURO), the Eastern Mediterranean Region (EMRO), the Region of the Americas (AMRO), the South-East Asia Region (SEARO), and the Western Pacific Region (WPRO).

## References

- 1 Pownuk, Andrzej and Kreinovich, Vladik, "Why Linear Interpolation?" (2017). Departmental Technical Reports (CS). 1098
- 2 Rubin, DB. Statistical Matching Using File Concatenation with Adjusted Weights and Multiple Imputations. *Journal of Business & Economic Statistics* 1986; **4** (1): 87–94.
- 3 Little, RJA. Missing-Data Adjustments in Large Surveys. *Journal of Business & Economic Statistics* 1988; **6** (3): 287–296.
- 4 Van Buuren S, Groothuis-Oudshoorn K. mice: Multivariate Imputation by Chained Equations in R. [Internet]. *J. Stat. Soft* 2011; **45**(3):1-67. Available from: <https://www.jstatsoft.org/index.php/jss/article/view/v045i03> (Accessed by December 2021)
- 5 Rubin DB, Schenker N. Multiple imputation in health-care databases: an overview and some applications. *Stat Med.* 1991; **10**(4): 585-98.
- 6 Sinharay S, Stern HS, Russell D. The use of multiple imputation for the analysis of missing data. *Psychol Methods.* 2001; **6**(4): 317-29.
- 7 Shao J, Zhong B. Last observation carry-forward and last observation analysis. *Stat Med.* 2003; **22**(15): 2429-41.
- 8 Lachin JM. Fallacies of last observation carried forward analyses. *Clin Trials.* 2016; **13**(2): 161-8.
- 9 Schomaker M, Heumann C. Bootstrap inference when using multiple imputation. *Stat Med* 2018; **37**(14):2252-2266
